# Supplementary material for: Decreased glutathione reductase2 leads to early leaf senescence in Arabidopsis
Source: PubMed Central journal article supplement — J Integr Plant Biol. 2015 Aug 24;58(1):29–47. doi: 10.1111/jipb.12371 (PMC5049652; doi:10.1111/jipb.12371), 2015-08-24
Supplement: JIPB-58-29-s001.pdf [file JIPB-58-29-s001.pdf]

## Supplementary Data

### Decreased glutathione reductase2 leads to early leaf senescence in *Arabidopsis*

Shunhua Ding, Liang Wang, Zhipan, Yang, Qingtao Lu, Xiaogang Wen and Congming Lu

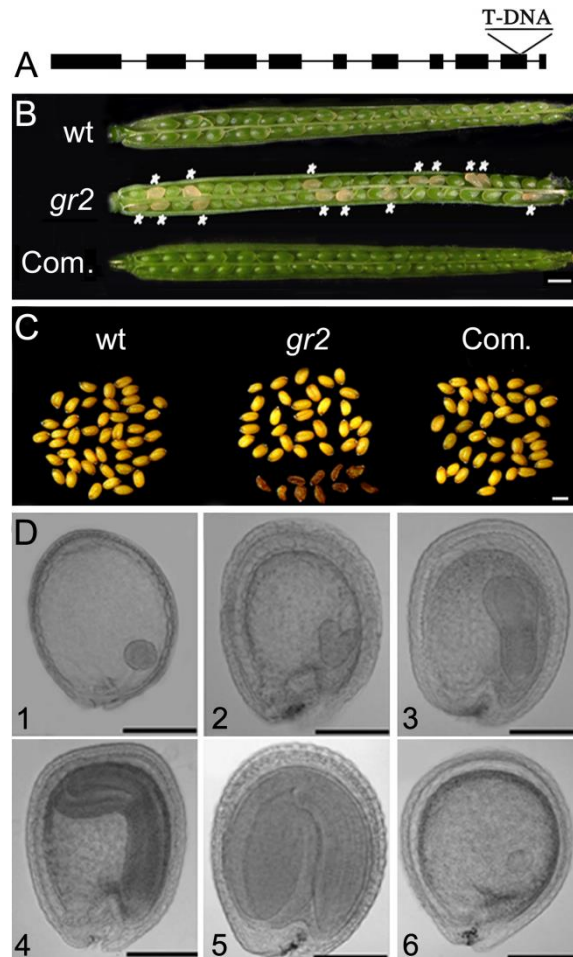

**Figure S1.** Gene structure of At3g54660 and microscopy analysis of developing embryos in the siliques of wild-type and heterozygous *gr2* plants. (A) Schematic diagram of the gene structure of At3g54660 and the insertion positions of T-DNA in At3g54660. The exons are shown as black boxes, and introns are shown as black lines. (B) Opened developing siliques of wild type plants (wt), heterozygous *gr2* plants (*gr2*), and the complemented plant (Comp.). Seeds in the developing siliques of wt are all green, whereas the siliques of heterozygous *gr2* mutant alleles have white (indicated by the asterisks) and green seeds. Bars = 1 mm. (C) Mature seeds from one silique of wt, heterozygous *gr2* plants, and the complemented plants. In the mature siliques of heterozygous *gr2* mutant, homozygous mutant seeds are recognizable as smaller, wrinkled and puce seeds. Bars = 1 mm. (D) Nomarski bright-field microscopy of cleared seeds of the heterozygous *gr2* mutant siliques. Embryo development of wt seeds at the globular (1), heart (2), torpedo (3), walking-stick (4) and cotyledon (5) stages and homozygous *gr2* at the globular (6) stage. Bars = 100  $\mu$ m.

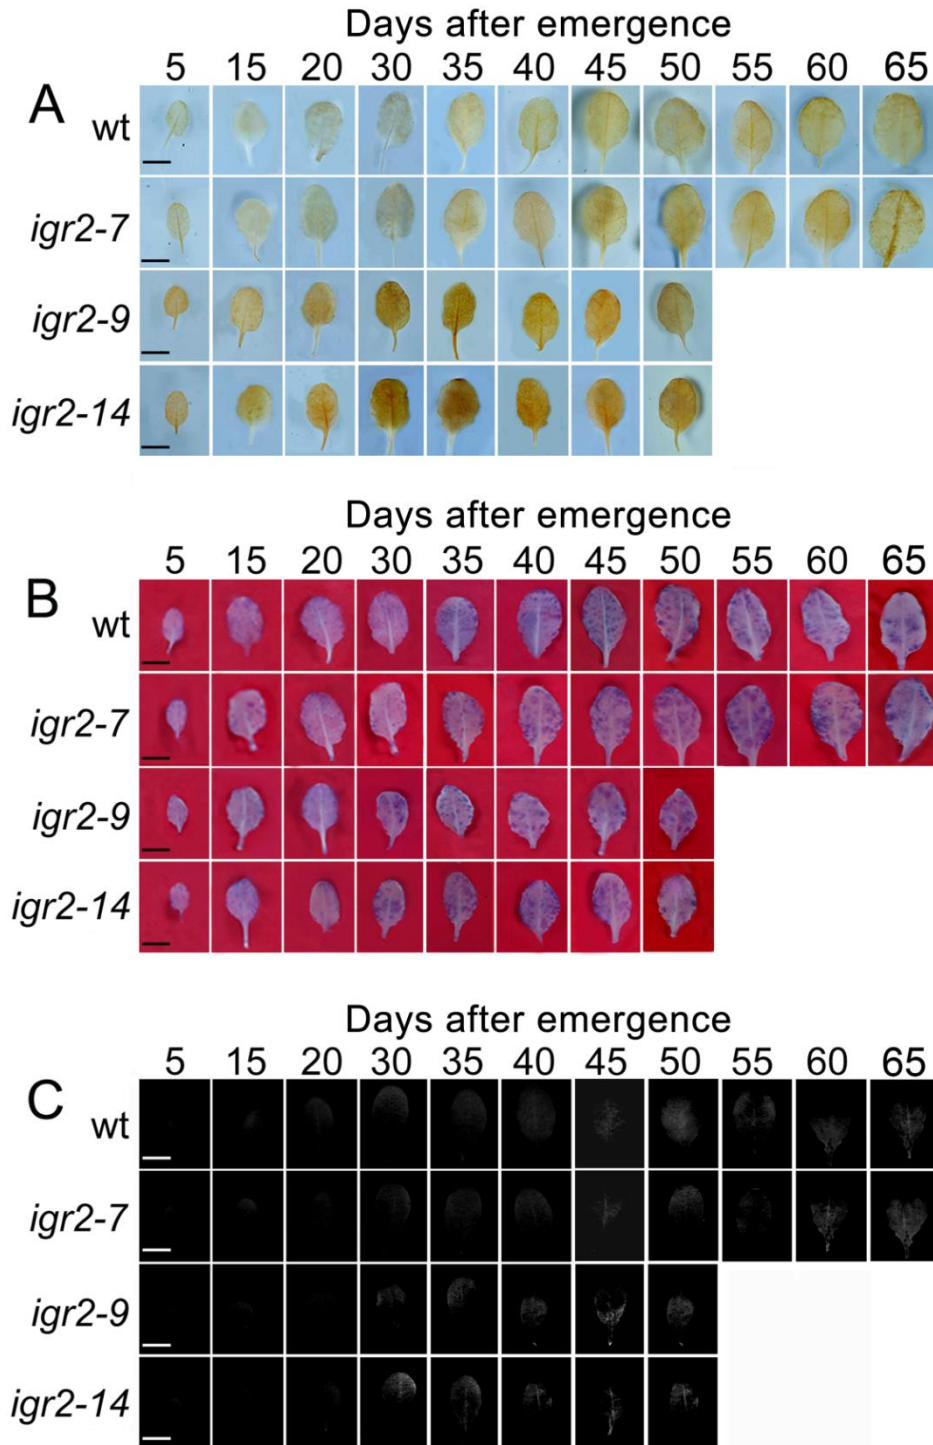

**Figure S2.** ROS levels in wild-type (wt) and *GR2* RNAi (*igr2-7*, *igr2-9*, and *igr2-14*) plants during leaf development. (A)  $\text{H}_2\text{O}_2$  levels detected by DAB staining. (B)  $\text{O}_2^{\cdot -}$  levels detected by NBT staining. (C)  $^1\text{O}_2$  levels detected by SOSG fluorescence imaging. The fourth rosette leaves from wt and transgenic plants grown in soil were harvested at the indicated time points for the experiments, and representative leaves were photographed. Bars = 5 mm.

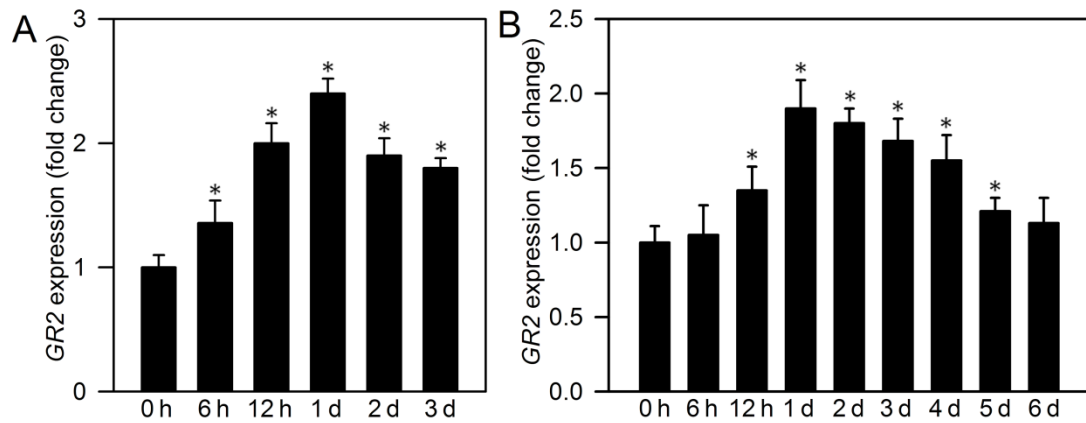

**Figure S3.** Expression of *GR2* is induced by elevated H<sub>2</sub>O<sub>2</sub> levels and continuous darkness. Expression levels of *GR2* induced by 10 mM H<sub>2</sub>O<sub>2</sub> (A) and darkness (B) were quantified by real-time PCR in detached leaves from 3-week-old seedlings of wild type plants. Samples of total RNA were prepared from leaves collected at the indicated time. Data were normalized to the expression of *ACTIN2* (At3g46520). Fold change at 0 h was set as 1. \**P*<0.01 versus wild type plants at 0 h. Data represent means ±SD (n=4).

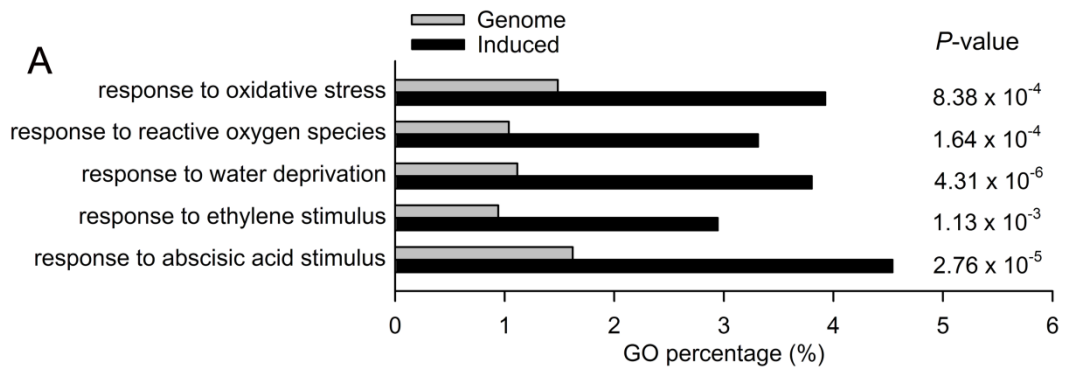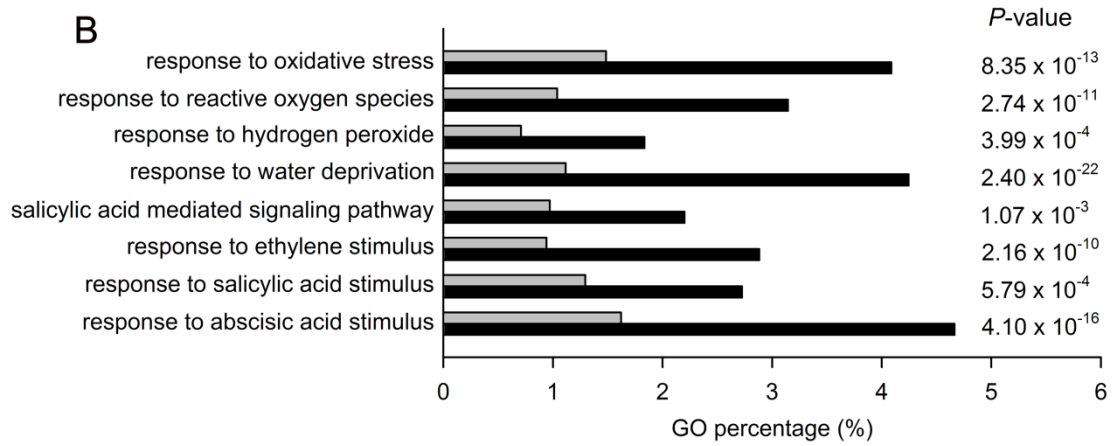

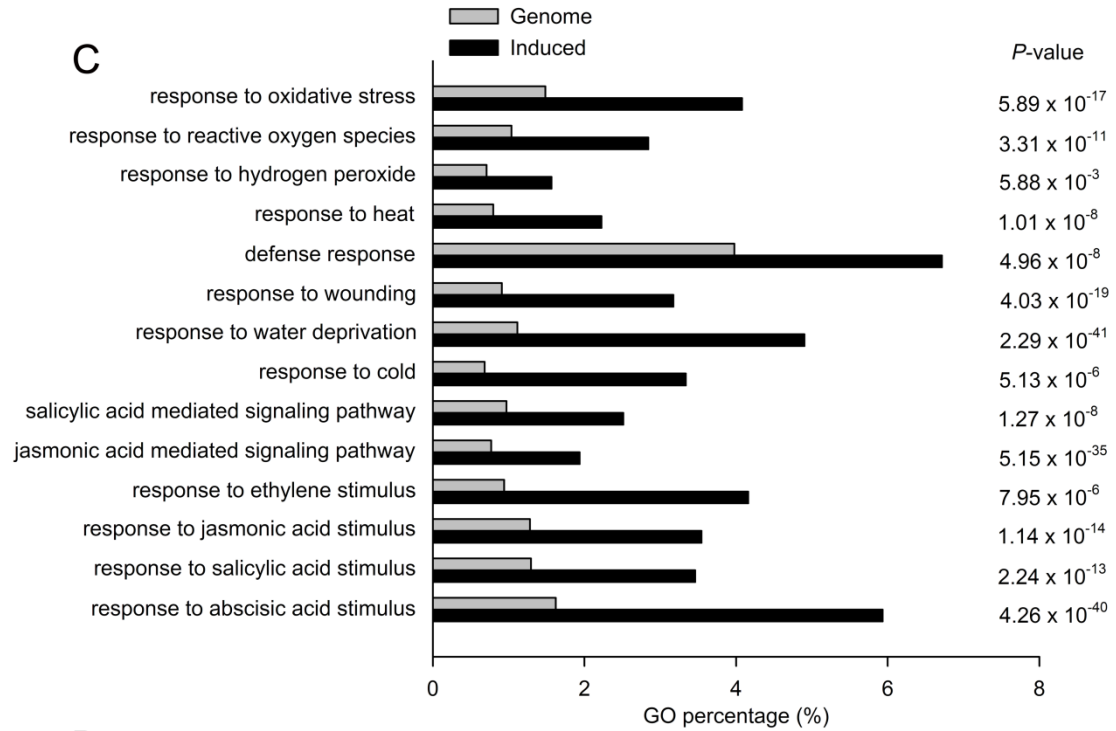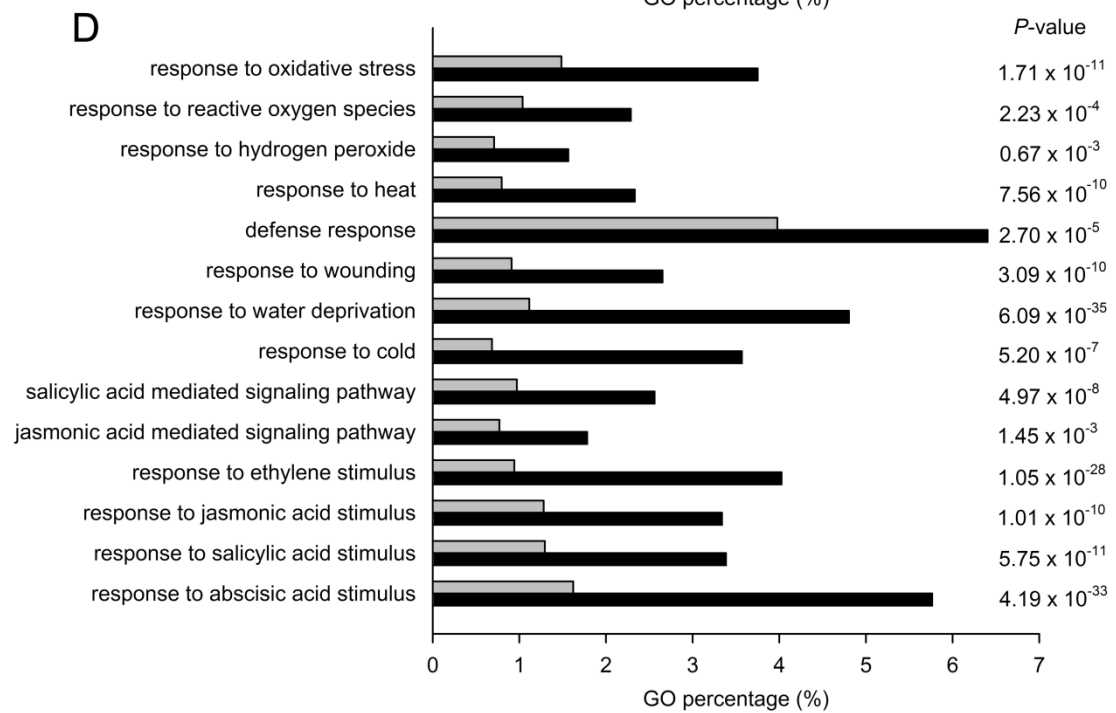

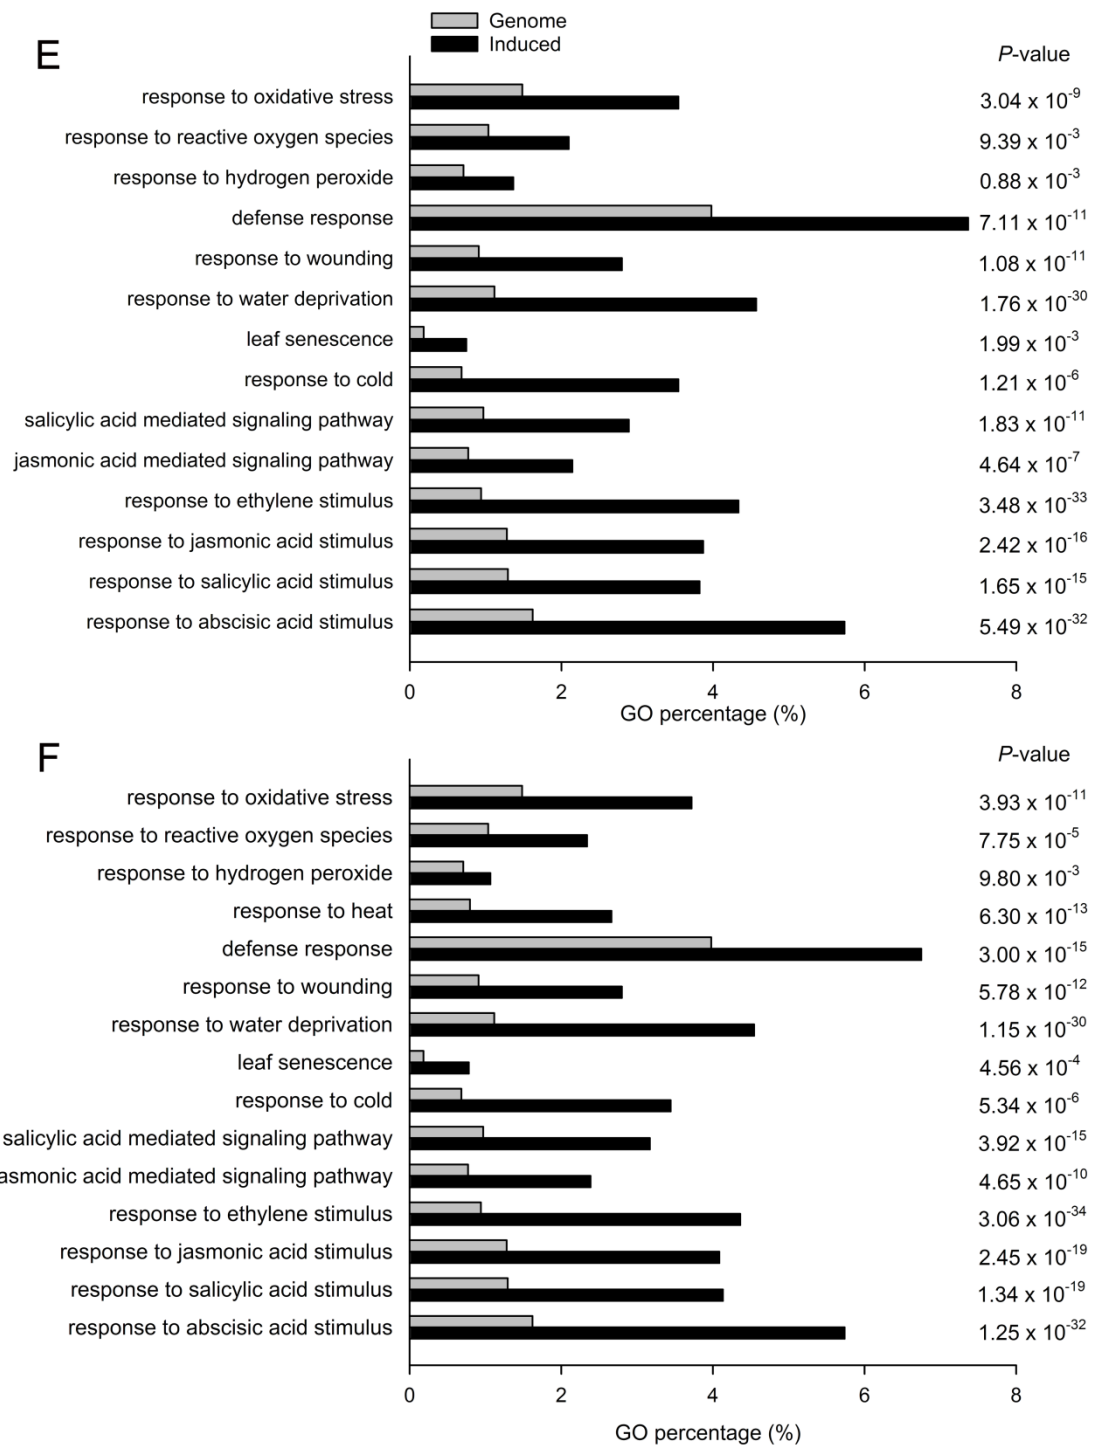

**Figure S4.** Analysis of genes up-regulated during the early stages of leaf development in *Arabidopsis* by specific GO terms. A, B, C, D, E, and F represent the leaf at 19, 21, 23, 25, 27, and 29 days after sowing. *P*-values in A-F were calculated by Fisher's test to compare the percentage distribution of GO annotation from genes induced during early stages of leaf development and the whole genome. Microarray data were from Breeze et al. (2011).

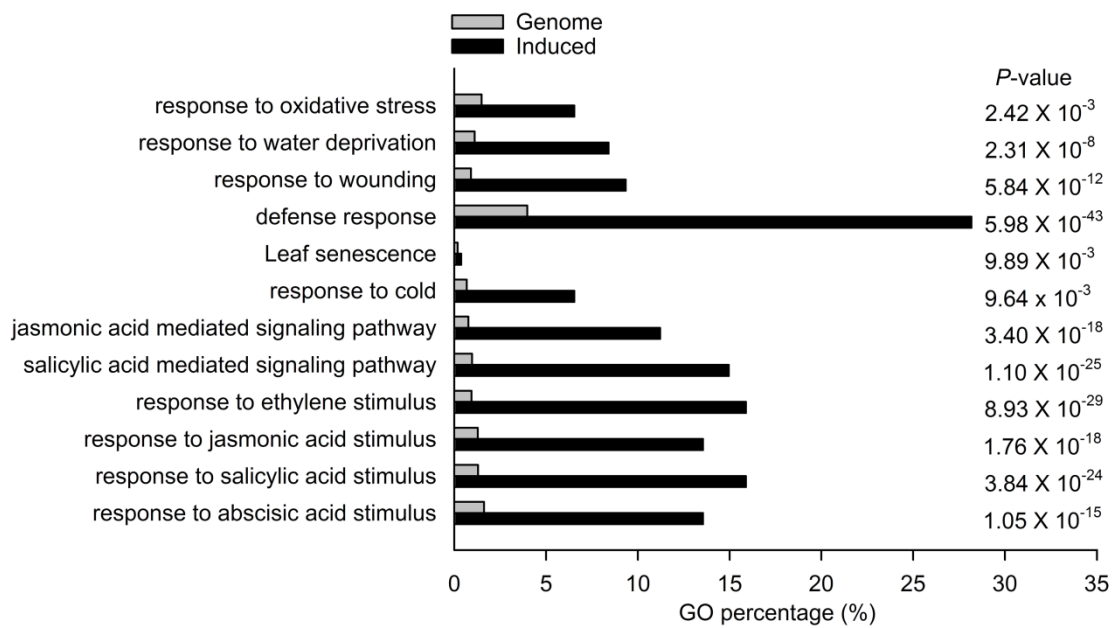

**Figure S5.** Analysis of genes specifically up-regulated after 8 h of H<sub>2</sub>O<sub>2</sub> production in leaf chloroplasts in *Arabidopsis* overexpressing glycolate oxidase in the chloroplast under a 16 h light/8 h dark regime (Fahnenstich et al., 2008). *P*-values were calculated by Fisher's test to compare the percentage distribution of GO annotation from genes induced in *Arabidopsis* overexpressing glycolate oxidase in the chloroplast and the whole genome. Microarray data were from Sewelam et al. (2014).

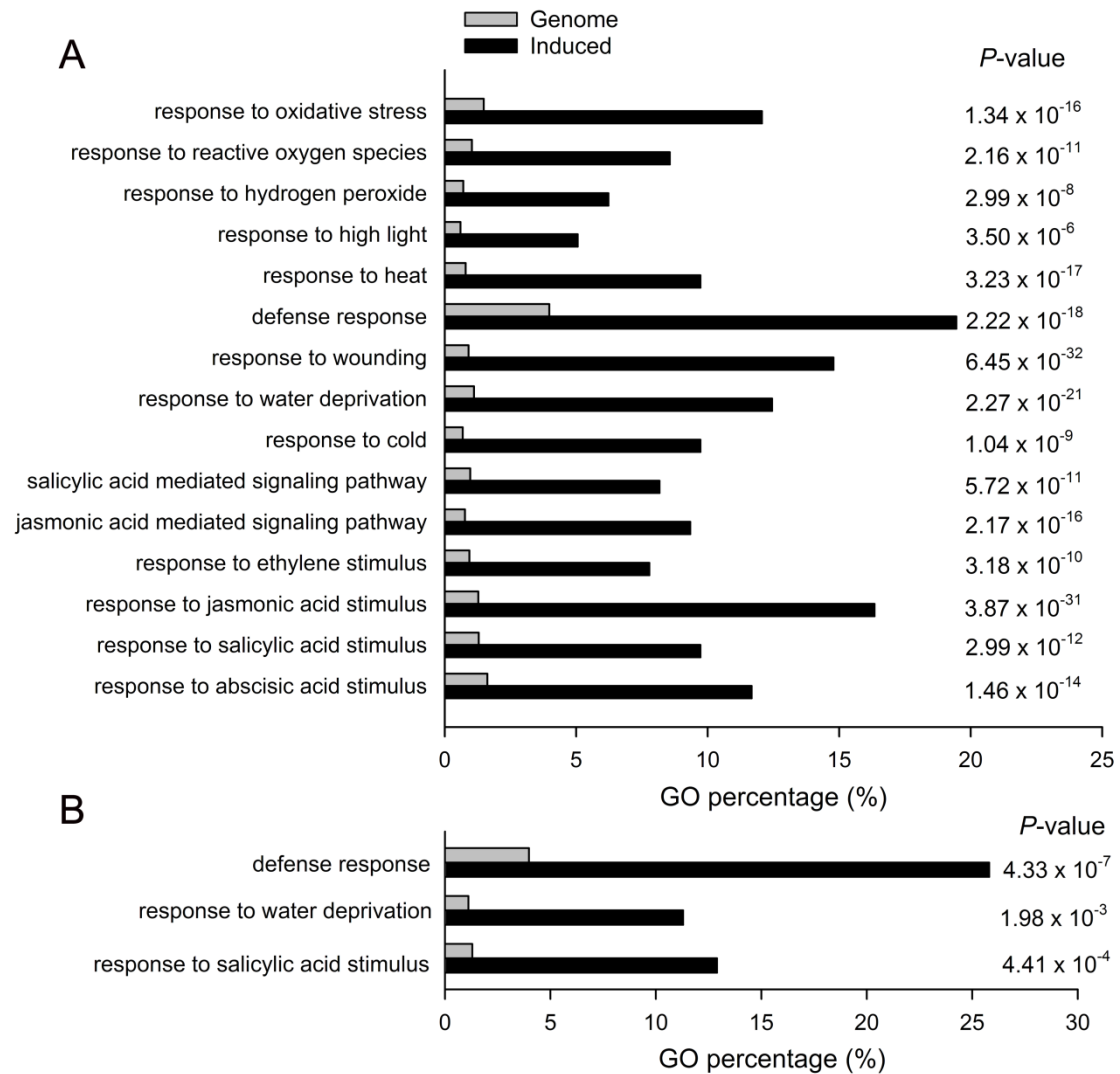

**Figure S6.** Analysis of genes up-regulated in *cat2* following induction of glutathione oxidation after transfer from high CO<sub>2</sub> to ambient air in 8 h (short days, A) and 16 h (long days, B). *P*-values were calculated by Fisher's test to compare the percentage distribution of GO annotation from genes in *cat2* induced after transfer from high CO<sub>2</sub> to air and the whole genome. Microarray data were from Mhamdi et al. (2010).



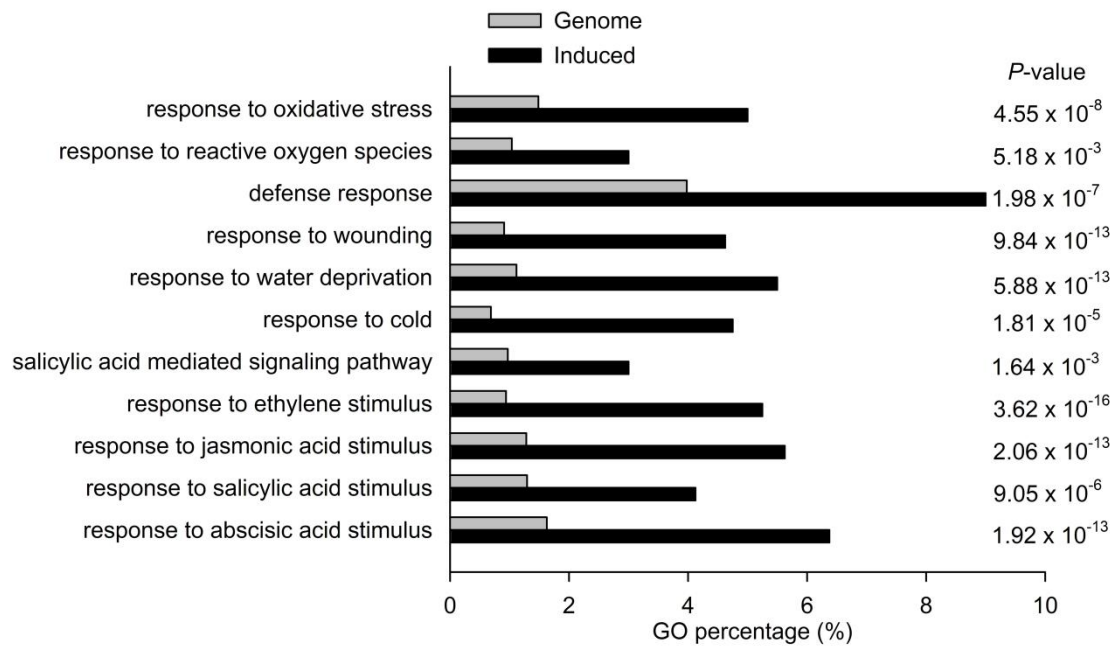

**Figure S7.** Analysis of genes up-regulated in shoots of the 7-day-old *rootmeristemless1-1* (*rml1-1*) mutant. *P*-values were calculated by Fisher's test to compare the percentage distribution of GO annotation from genes in *rml1-1* and the whole genome. Microarray data were from Schnaubelt et al. (2014).

**Table S1.** List of primers used in this study.

| <b>Primer name</b>              | <b>Primer sequence from 5' to 3'</b> |
|---------------------------------|--------------------------------------|
| atgr2 primers- forward          | ATACCATGGTCGTGGAGATGGCTTCGAC         |
| atgr2 primers- reverse          | AGAGGTCACCGCAACCTTCTCTACACCC         |
| igr2 sense primers- forward     | GCTTCTAGACATCTACCATCATCTTCTTCCTCT    |
| igr2 sense primers- reverse     | AGTAAGCTTCTGGAATGTCAGGAATGAAAGGAC    |
| igr2 antisense primers- forward | GCTCTCGAGCATCTACCATCATCTTCTTCCTCT    |
| igr2 antisense primers- reverse | AGTGAATTCCTGGAATGTCAGGAATGAAAGGAC    |
| GR2LP                           | TGACCGAATCAATTTGACTCC                |
| GR2RP                           | TCAAACACCGTTATGGAGGAG                |
| GR2pro1                         | GAATTCGATGGATGTTTGTGTAGTATGTTTGT     |
| GR2pro2                         | GGATCC GAGGAATTGAAGAGATGGAGAAGATG    |
| antiGR2- forward                | TCGAAGCTTGCAATTCATCTACCATCATC        |
| antiGR2- reverse                | ACACTCGAGATCGTAGTGCCGGTCTGATT        |
| <i>SAG12</i> - forward          | TATTACAGGTTATGAGGATGTCCC             |
| <i>SAG12</i> - reverse          | ACCACATAGTCCTTGTTTATCC               |
| <i>SAG13</i> - forward          | GAACTCAAGATGGAGTCTTGG                |
| <i>SAG13</i> - reverse          | ATTGTTGACGAGGATGTTGAG                |
| <i>ACT2</i> - forward           | TTGGGATGAACCAGAAGG                   |
| <i>ACT2</i> - reverse           | AACCCTCGTAGATTGGCA                   |
| AT1G02930- forward              | CAACCTTCTCTCAACTGGCA                 |
| AT1G02930- reverse              | AGCAACCCAAGCACTCACA                  |
| AT1G03850- forward              | AAACGGCTGCTACTGACAC                  |
| AT1G03850- reverse              | GACTGAGAACGACGACCAT                  |
| AT1G76080- forward              | TATGGTGGAAGTACTGAGCAGG               |
| AT1G76080- reverse              | GCAGAGTGTTGTCTCCGTA                  |
| AT2G03760- forward              | CCGACATTATCCTCGTCAC                  |
| AT2G03760- reverse              | GAGAAGGCAAACCTGGAGAAA                |
| AT2G14610- forward              | CGCAGAACAACCTAAGAGGC                 |
| AT2G14610- reverse              | CACATCCGAGTCTCACTGAC                 |
| AT3G09640- forward              | TGATGTGAAGACGAAGACAGG                |
| AT3G09640- reverse              | TGAAATGGAATCTCTGGTCC                 |
| AT3G10500- forward              | GTGTTACCAAGATGCGTT                   |
| AT3G10500- reverse              | CAAAGTAGCCACCAGAGTCC                 |
| AT3G23240- forward              | AGTCCACGCAACAAACCT                   |
| AT3G23240- reverse              | GGAGAACAACCATCCTCGT                  |
| AT3G26830- forward              | CGGAAACTTACACCAACGC                  |
| AT3G26830- reverse              | ATCAGACTCCACTCGTCACC                 |
| AT4G12470- forward              | TCAGTCCCAAGTCCTAATCC                 |
| AT4G12470- reverse              | CATAGACAAATCGCAGCG                   |
| AT4G23810- forward              | CTTCTGCTAAACTGGTCATCC                |
| AT4G23810- reverse              | CTCTCTCTGGGCTTATTCTCA                |

|                    |                        |
|--------------------|------------------------|
| AT4G35770- forward | GAGGAAAGCAACGACAACAA   |
| AT4G35770- reverse | ACCGCTCTCACAACCGATT    |
| AT5G39610- forward | AAGATTGAGCCTTGGGACT    |
| AT5G39610- reverse | GCTGGTTCCATTCCGGTTA    |
| AT5G39580- forward | TGGTGTGTCTCTTGTGCTG    |
| AT5G39580- reverse | ATCGTGTGTCCTCCTCCAA    |
| AT5G44420- forward | AAGTTGTGCGAGAAGCCA     |
| AT5G44420- reverse | GTGTGCTGGGAAGACATAGTT  |
| AT5G46050- forward | GGATGGCTTATTACGGGAT    |
| AT5G46050- reverse | TGGAACATTCTGGTGGCT     |
| AT5G64930- forward | GTTCCTTTGCGACCAACT     |
| AT5G64930- reverse | GTTTGCTCGTGTGTTGCTCT   |
| AT3G57240- forward | GCAGTTGGACAAATCGGA     |
| AT3G57240- reverse | CAGAGATGTAGCGAAATGTGAC |
| AT4G11890- forward | TCATTAGCAGAAGGAAGGCT   |
| AT4G11890- reverse | GACCAGGAGATAAAGATGGC   |
| AT2G13810- forward | TTGATAAGCCTTGGGACTG    |
| AT2G13810- reverse | CGTTGGAGCCTAAGAGTAGC   |
| AT2G44840- forward | ACTCTCCGTGATGCCGTTAG   |
| AT2G44840- reverse | TCGTAAGTCCCGAGCCAAA    |
| AT2G19190- forward | GCTGTTACGATGTTCCGAC    |
| AT2G19190- reverse | GGAGTTCCTGCGTTCTTATC   |
| AT2G35980- forward | TCCCTTATTGTCATCCTCG    |
| AT2G35980- reverse | GTGTGAGAACGTTGTGTTT    |
| AT5G26170- forward | GTGATGTTGCTGGTGCTTT    |
| AT5G26170- reverse | CCATACTTTCTCCACTTGAACC |
| AT4G27410- forward | GGTAAGGCTTTGTTTGGAGA   |
| AT4G27410- reverse | ACCCATTCGTGCTATGCT     |
| AT4G17490- forward | GTTGTAGCAGCAGAGGAGAAG  |
| AT4G17490- reverse | TCTATCGCCGTCAAACCT     |
| AT2G32020- forward | TCCAATCGGCTACATCTTG    |
| AT2G32020- reverse | CTTCCTCATCACACCTTCTCTA |
| AT3G63060- forward | CAGATTCTCCAAGACATCCG   |
| AT3G63060- reverse | ACCTAACCTTCTCCTCCAGC   |
| AT3G10320- forward | TCAGAACACACTCTCCTTCCT  |
| AT3G10320- reverse | CAGCAATCACAAAGACAACC   |
| AT5G12030- forward | CCCTGAAGAACAAACCGA     |
| AT5G12030- reverse | GTCATTACAAGCCGCAGAG    |
| AT5G62480- forward | ACGGTAAACCCATCTCTGAG   |
| AT5G62480- reverse | GGTCTCGTTCGTCACAGTT    |
| AT1G17170- forward | GCGAGTATGTTTGGGATGA    |
| AT1G17170- reverse | TTCTTGCTCCTCACCTTTG    |

**Table S2.** Genes found to be significantly ( $P < 0.01$ ) up-regulated ( $\geq 2$ , A) or down-regulated ( $\leq 2$ , B) in *igr2-9* in a microarray analysis. Data were mean from three biological replicates.

| A  | Probe Name   | Fold change | TAIR Locus | Description                                                  |
|----|--------------|-------------|------------|--------------------------------------------------------------|
| 1  | A_84_P220938 | 2.33        | AT1G02470  | SRPBCC ligand-binding domain-containing protein              |
| 2  | A_84_P812454 | 2.00        | AT1G02930  | glutathione transferase                                      |
| 3  | A_84_P17031  | 2.72        | AT1G03850  | glutaredoxin (GRXS13)                                        |
| 4  | A_84_P22747  | 3.32        | AT1G04150  | C2 domain-containing protein                                 |
| 5  | A_84_P836118 | 4.63        | AT1G04310  | ethylene response sensor 2(ERS2)                             |
| 6  | A_84_P590571 | 2.16        | AT1G04500  | CCT motif-containing protein                                 |
| 7  | A_84_P15370  | 2.74        | AT1G04980  | disulfide isomerase-like protein (PDI10)                     |
| 8  | A_84_P12333  | 3.59        | AT1G05330  | hypothetical protein                                         |
| 9  | A_84_P19923  | 2.63        | AT1G05680  | UDP-glucosyltransferase (UGT74E2)                            |
| 10 | A_84_P829388 | 2.19        | AT1G07150  | mitogen-activated protein kinase kinase kinase 13 (MAPKKK13) |
| 11 | A_84_P15750  | 2.91        | AT1G08100  | nitrate transporter 2.2 (NRT2.2)                             |
| 12 | A_84_P264050 | 2.30        | AT1G08310  | esterase/lipase/thioesterase-like protein                    |
| 13 | A_84_P143569 | 2.09        | AT1G08320  | bZIP transcription factor-like protein                       |
| 14 | A_84_P19883  | 2.11        | AT1G08650  | phosphoenolpyruvate carboxylase kinase 1 (PPCK1)             |
| 15 | A_84_P754066 | 3.85        | AT1G09026  | hypothetical protein                                         |
| 16 | A_84_P593284 | 2.73        | AT1G10455  | B3 domain-containing protein                                 |
| 17 | A_84_P541716 | 3.76        | AT1G11690  | hypothetical protein                                         |
| 18 | A_84_P602209 | 7.63        | AT1G12330  | hypothetical protein                                         |
| 19 | A_84_P12457  | 3.19        | AT1G13420  | sulfotransferase 4B (ST4B)                                   |
| 20 | A_84_P788748 | 2.67        | AT1G13470  | hypothetical protein                                         |
| 21 | A_84_P23721  | 3.33        | AT1G14200  | RING/U-box superfamily protein                               |

|    |              |      |           |                                                           |
|----|--------------|------|-----------|-----------------------------------------------------------|
| 21 | A_84_P16226  | 2.00 | AT1G14540 | peroxidase superfamily protein                            |
| 22 | A_84_P814710 | 2.18 | AT1G14870 | cadmium resistance protein 2 (PCR2)                       |
| 23 | A_84_P145049 | 3.10 | AT1G14880 | cadmium resistance protein 1 (PCR1)                       |
| 24 | A_84_P12394  | 3.47 | AT1G14960 | major latex-related protein                               |
| 25 | A_84_P18989  | 2.43 | AT1G16420 | cysteine-type endopeptidase (MC8)                         |
| 26 | A_84_P612892 | 3.91 | AT1G17665 | hypothetical protein                                      |
| 27 | A_84_P21746  | 3.19 | AT1G17710 | pyridoxal phosphate phosphatase-related protein           |
| 28 | A_84_P811026 | 2.86 | AT1G17860 | Kunitz family trypsin and protease inhibitor protein      |
| 29 | A_84_P20019  | 3.42 | AT1G17960 | threonyl-tRNA synthetase                                  |
| 30 | A_84_P841708 | 3.37 | AT1G18120 | putative myosinase-associated protein                     |
| 31 | A_84_P21916  | 2.56 | AT1G19250 | putative flavin-containing monooxygenase 1 (FMO1)         |
| 32 | A_84_P13909  | 2.01 | AT1G19320 | pathogenesis-related thaumatin-like protein               |
| 33 | A_84_P15258  | 2.10 | AT1G20120 | GDSL esterase/lipase                                      |
| 34 | A_84_P16204  | 2.92 | AT1G20150 | subtilisin-like serine endopeptidase-like protein         |
| 35 | A_84_P13406  | 2.39 | AT1G20350 | translocase inner membrane subunit 17-1 (TIM17-1)         |
| 36 | A_84_P149248 | 2.13 | AT1G21120 | O-methyltransferase family protein                        |
| 37 | A_84_P240035 | 2.83 | AT1G21230 | wall-associated receptor kinase 5 (WAK5)                  |
| 38 | A_84_P751391 | 3.72 | AT1G21525 | unknown protein                                           |
| 39 | A_84_P12797  | 4.14 | AT1G21528 | hypothetical protein                                      |
| 40 | A_84_P788693 | 2.94 | AT1G22090 | hypothetical protein (emb2204)                            |
| 41 | A_84_P19085  | 3.35 | AT1G22290 | 14-3-3 family protein                                     |
| 42 | A_84_P750934 | 4.03 | AT1G22580 | similar to putative AP endonuclease/reverse transcriptase |
| 43 | A_84_P11369  | 4.02 | AT1G23110 | hypothetical protein                                      |
| 44 | A_84_P10408  | 3.02 | AT1G23520 | hypothetical protein                                      |
| 45 | A_84_P16078  | 3.47 | AT1G23660 | hypothetical protein                                      |

|    |              |      |           |                                                          |
|----|--------------|------|-----------|----------------------------------------------------------|
| 46 | A_84_P12298  | 2.39 | AT1G23760 | putative polygalacturonase non-catalytic subunit (JP630) |
| 47 | A_84_P13739  | 2.31 | AT1G24090 | putative thiol-disulfide oxidoreductase (DCC)            |
| 48 | A_84_P14205  | 2.47 | AT1G24260 | developmental protein SEPALLATA 3                        |
| 49 | A_84_P751750 | 2.97 | AT1G24380 | hypothetical protein                                     |
| 50 | A_84_P561285 | 2.97 | AT1G26140 | hypothetical protein                                     |
| 51 | A_84_P21874  | 2.32 | AT1G27730 | cys2/His2-type zinc-finger protein                       |
| 52 | A_84_P21874  | 3.55 | AT1G27730 | salt tolerance zinc finger (ZAT10)                       |
| 53 | A_84_P23823  | 2.76 | AT1G28360 | ERF domain protein 12 (ERF12)                            |
| 54 | A_84_P23740  | 3.38 | AT1G28450 | agamous-like 58 (AGL58)                                  |
| 55 | A_84_P869545 | 2.91 | AT1G29060 | transport protein SFT1                                   |
| 56 | A_84_P10688  | 2.53 | AT1G30070 | SGS domain-containing protein                            |
| 57 | A_84_P18030  | 2.39 | AT1G30720 | FAD-binding and BBE domain-containing protein            |
| 58 | A_84_P14191  | 3.07 | AT1G30920 | F-box domain-containing protein                          |
| 59 | A_84_P753082 | 3.81 | AT1G30972 | plant thionin family protein                             |
| 60 | A_84_P583566 | 2.62 | AT1G31600 | RNA recognition motif-containing protein                 |
| 61 | A_84_P545286 | 3.42 | AT1G33530 | F-box protein                                            |
| 62 | A_84_P525852 | 3.09 | AT1G34910 | unknown protein                                          |
| 63 | A_84_P10558  | 2.91 | AT1G36180 | acetyl-CoA carboxylase 2 (ACC2)                          |
| 64 | A_84_P83359  | 2.68 | AT1G36580 | hypothetical protein                                     |
| 65 | A_84_P737368 | 2.59 | AT1G36622 | hypothetical protein                                     |
| 66 | A_84_P843338 | 4.41 | AT1G36800 | gypsy-like retrotransposon family protein                |
| 67 | A_84_P20196  | 2.34 | AT1G36950 | RING/U-box domain-containing protein                     |
| 68 | A_84_P751597 | 5.36 | AT1G40083 | hypothetical protein                                     |
| 69 | A_84_P604064 | 3.29 | AT1G43630 | hypothetical protein                                     |
| 70 | A_84_P751942 | 4.20 | AT1G43725 | copia-like retrotransposon family protein                |

|    |              |      |           |                                                   |
|----|--------------|------|-----------|---------------------------------------------------|
| 71 | A_84_P552447 | 2.11 | AT1G44414 | unknown protein                                   |
| 72 | A_84_P17122  | 3.30 | AT1G44970 | peroxidase 9                                      |
| 73 | A_84_P797614 | 4.89 | AT1G47565 | retrotransposon gag protein                       |
| 74 | A_84_P20699  | 3.52 | AT1G47730 | putative F-box protein                            |
| 75 | A_84_P11283  | 3.50 | AT1G47980 | hypothetical protein                              |
| 76 | A_84_P16733  | 4.81 | AT1G48130 | 1-Cys peroxiredoxin PER1 (PER1)                   |
| 77 | A_84_P752079 | 3.74 | AT1G48700 | oxidoreductase                                    |
| 78 | A_84_P533868 | 2.27 | AT1G49000 | hypothetical protein                              |
| 79 | A_84_P584493 | 3.91 | AT1G49770 | transcription factor bHLH95 (RGE1)                |
| 80 | A_84_P14059  | 2.77 | AT1G50400 | mitochondrial import receptor subunit TOM40       |
| 81 | A_84_P16080  | 3.70 | AT1G51290 | putative F-box only protein 10                    |
| 82 | A_84_P22854  | 3.42 | AT1G51790 | leucine-rich repeat protein kinase-like protein   |
| 83 | A_84_P10528  | 2.69 | AT1G51800 | putative leucine-rich repeat protein kinase       |
| 84 | A_84_P21942  | 3.65 | AT1G51850 | leucine-rich repeat protein kinase family protein |
| 85 | A_84_P541841 | 2.32 | AT1G51920 | hypothetical protein                              |
| 86 | A_84_P575563 | 3.62 | AT1G51970 | hypothetical protein                              |
| 87 | A_84_P152118 | 3.74 | AT1G52200 | PLAC8 family protein                              |
| 88 | A_84_P115542 | 2.58 | AT1G52940 | purple acid phosphatase 5 (PAP5)                  |
| 89 | A_84_P11501  | 2.13 | AT1G53680 | glutathione transferase                           |
| 90 | A_84_P13294  | 2.94 | AT1G54840 | HSP20-like chaperones superfamily protein         |
| 91 | A_84_P753944 | 3.71 | AT1G55045 | hypothetical protein                              |
| 92 | A_84_P13412  | 2.69 | AT1G55410 | CHP-rich zinc finger protein                      |
| 93 | A_84_P21748  | 2.65 | AT1G55720 | cation exchanger 6 (CAX6)                         |
| 94 | A_84_P750600 | 3.70 | AT1G56480 | pectinesterase                                    |
| 95 | A_84_P544532 | 2.11 | AT1G58225 | hypothetical protein                              |

|     |              |      |           |                                                                                     |
|-----|--------------|------|-----------|-------------------------------------------------------------------------------------|
| 96  | A_84_P16267  | 2.72 | AT1G58430 | GDSL esterase/lipase (RXF26)                                                        |
| 97  | A_84_P148918 | 2.78 | AT1G60830 | RNA recognition motif-containing protein                                            |
| 98  | A_84_P22723  | 3.57 | AT1G61320 | FBD-associated F-box protein                                                        |
| 99  | A_84_P754772 | 2.34 | AT1G61415 | hypothetical protein                                                                |
| 100 | A_84_P20982  | 2.84 | AT1G61950 | calcium-dependent protein kinase 19 (CPK19)                                         |
| 101 | A_84_P22871  | 3.79 | AT1G62170 | putative non-inhibitory serpin-Z5                                                   |
| 102 | A_84_P844414 | 3.06 | AT1G62340 | PA-domain containing subtilase-like protein (ALE1)                                  |
| 103 | A_84_P24111  | 2.97 | AT1G62940 | 4-coumarate--CoA ligase-like 1 (ACOS5)                                              |
| 104 | A_84_P196104 | 4.54 | AT1G64560 | pseudogene of S-adenosylmethionine-dependent methyltransferase                      |
| 105 | A_84_P11420  | 2.94 | AT1G64920 | UDP-glycosyltransferase-like protein                                                |
| 106 | A_84_P610339 | 2.23 | AT1G65040 | homologs of the yeast/human Hrd1 protein (HRD1B)                                    |
| 107 | A_84_P169033 | 2.30 | AT1G65970 | peroxiredoxin-2C (TPX2)                                                             |
| 108 | A_84_P16867  | 4.26 | AT1G66210 | subtilisin-like serine endopeptidase family protein                                 |
| 109 | A_84_P16122  | 2.00 | AT1G66290 | putative F-box/FBD/LRR-repeat protein                                               |
| 110 | A_84_P163133 | 2.15 | AT1G67600 | acid phosphatase/vanadium-dependent haloperoxidase-related protein                  |
| 111 | A_84_P17165  | 3.19 | AT1G67990 | putative caffeoyl-CoA O-methyltransferase (TSM1)                                    |
| 112 | A_84_P22829  | 2.76 | AT1G68290 | endonuclease 2 (ENDO 2)                                                             |
| 113 | A_84_P14181  | 2.37 | AT1G69120 | floral homeotic protein APETALA 1 (AP1)                                             |
| 114 | A_84_P11456  | 2.08 | AT1G69710 | regulator of chromosome condensation and FYVE zinc finger domain-containing protein |
| 115 | A_84_P577399 | 4.06 | AT1G69940 | pectinesterase PPME1 (PPME1)                                                        |
| 116 | A_84_P539253 | 2.88 | AT1G70440 | SRO3-like protein (SRO3)                                                            |
| 117 | A_84_P752131 | 2.76 | AT1G71280 | DEAD-box ATP-dependent RNA helicase 55                                              |
| 118 | A_84_P11333  | 3.59 | AT1G71530 | protein kinase domain-containing protein                                            |
| 119 | A_84_P843906 | 2.63 | AT1G72060 | serine-type endopeptidase inhibitor                                                 |
| 120 | A_84_P10509  | 2.17 | AT1G72330 | alanine aminotransferase 2 (ALAAT2)                                                 |



|     |              |      |           |                                                                                    |
|-----|--------------|------|-----------|------------------------------------------------------------------------------------|
| 121 | A_84_P20004  | 2.14 | AT1G72660 | P-loop containing nucleoside triphosphate hydrolases superfamily protein           |
| 122 | A_84_P869312 | 2.70 | AT1G73010 | phosphate starvation-induced protein 2 (PS2)                                       |
| 123 | A_84_P22839  | 2.12 | AT1G73260 | trypsin inhibitor                                                                  |
| 124 | A_84_P10231  | 2.34 | AT1G73560 | bifunctional inhibitor/lipid-transfer protein/seed storage 2S albumin-like protein |
| 125 | A_84_P19071  | 2.79 | AT1G75290 | a protein similar to an isoflavone reductase                                       |
| 126 | A_84_P20902  | 3.64 | AT1G76080 | thioredoxin (CDSP32)                                                               |
| 127 | A_84_P752743 | 3.61 | AT1G77093 | defensin-like protein 281                                                          |
| 128 | A_84_P242975 | 2.22 | AT1G78410 | VQ motif-containing protein                                                        |
| 129 | A_84_P576539 | 2.58 | AT1G80540 | hypothetical protein                                                               |
| 130 | A_84_P854475 | 2.09 | AT2G01010 | 18SrRNA                                                                            |
| 131 | A_84_P757455 | 2.24 | AT2G01905 | cyclin J18 (CYCJ18)                                                                |
| 132 | A_84_P774108 | 2.70 | AT2G02270 | F-box protein                                                                      |
| 133 | A_84_P15330  | 3.47 | AT2G03130 | large subunit ribosomal protein L7/L12                                             |
| 134 | A_84_P858027 | 2.63 | AT2G03760 | flavonol sulfotransferase-like protein (SOT12)                                     |
| 135 | A_84_P600633 | 2.68 | AT2G04050 | MATE efflux family protein                                                         |
| 136 | A_84_P756195 | 3.55 | AT2G04070 | MATE efflux family protein                                                         |
| 137 | A_84_P840778 | 2.75 | AT2G05950 | unknown protein                                                                    |
| 138 | A_84_P837285 | 3.85 | AT2G06190 | gypsy-like retrotransposon family protein                                          |
| 139 | A_84_P756144 | 3.48 | AT2G06296 | hypothetical protein                                                               |
| 140 | A_84_P756260 | 2.85 | AT2G06570 | hypothetical protein                                                               |
| 141 | A_84_P155875 | 4.10 | AT2G10965 | hypothetical protein                                                               |
| 142 | A_84_P13475  | 3.86 | AT2G11810 | monogalactosyldiacylglycerol synthase 3 (MGDC)                                     |
| 143 | A_84_P754947 | 2.72 | AT2G12730 | mutator-like transposase family protein                                            |
| 144 | A_84_P15434  | 5.15 | AT2G13620 | cation/H(+) antiporter 15 (CHX15)                                                  |
| 145 | A_84_P23968  | 2.66 | AT2G13810 | AGD2-like defense response protein 1 (ALD1)                                        |

|     |              |      |           |                                                                                      |
|-----|--------------|------|-----------|--------------------------------------------------------------------------------------|
| 146 | A_84_P755036 | 2.73 | AT2G13890 | zinc knuckle (CCHC type) protein family                                              |
| 147 | A_84_P518024 | 2.81 | AT2G14000 | retrotransposon ORF-1 protein                                                        |
| 148 | A_84_P17268  | 2.97 | AT2G14610 | pathogenesis-related protein 1 (PR1)                                                 |
| 149 | A_84_P755577 | 3.98 | AT2G15460 | glycoside hydrolase family 28 protein / polygalacturonase (pectinase) family protein |
| 150 | A_84_P755542 | 2.30 | AT2G15470 | polygalacturonase-like protein                                                       |
| 151 | A_84_P538425 | 2.84 | AT2G15710 | TRAF-like family protein                                                             |
| 152 | A_84_P116392 | 3.91 | AT2G15910 | CSL zinc finger domain-containing protein                                            |
| 153 | A_84_P788534 | 3.36 | AT2G16210 | B3 domain-containing protein                                                         |
| 154 | A_84_P511815 | 5.28 | AT2G18193 | P-loop containing nucleoside triphosphate hydrolase-like protein                     |
| 155 | A_84_P23905  | 2.75 | AT2G19070 | spermidine hydroxycinnamoyl transferase (SHT)                                        |
| 156 | A_84_P14446  | 2.72 | AT2G19190 | senescence-induced receptor-like serine/threonine-protein kinase (FRK1)              |
| 157 | A_84_P794967 | 2.54 | AT2G19590 | aminocyclopropanecarboxylate oxidase (ACO1)                                          |
| 158 | A_84_P12526  | 4.79 | AT2G20510 | translocase inner membrane subunit 44-1 (TIM44-1)                                    |
| 159 | A_84_P13464  | 4.73 | AT2G20800 | NAD(P)H dehydrogenase B4 (NDB4)                                                      |
| 160 | A_84_P10627  | 3.04 | AT2G20880 | ethylene-responsive transcription factor ERF053                                      |
| 161 | A_84_P295894 | 3.75 | AT2G20940 | unknown function                                                                     |
| 162 | A_84_P788434 | 3.35 | AT2G21640 | hypothetical protein                                                                 |
| 163 | A_84_P832975 | 4.66 | AT2G23880 | non-LTR retrotransposon family protein                                               |
| 164 | A_84_P793391 | 4.28 | AT2G24420 | ATPase-related DNA repair protein                                                    |
| 165 | A_84_P862159 | 2.90 | AT2G24850 | tyrosine aminotransferase 3 (TAT3)                                                   |
| 166 | A_84_P18293  | 2.74 | AT2G25470 | receptor like protein 21 (RLP21)                                                     |
| 167 | A_84_P611946 | 2.27 | AT2G26160 | putative F-box protein                                                               |
| 168 | A_84_P503876 | 2.10 | AT2G27660 | cysteine/histidine-rich C1 domain-containing protein                                 |
| 169 | A_84_P503880 | 3.99 | AT2G28820 | plant U-box 24 protein (PUB12)                                                       |
| 170 | A_84_P796854 | 2.91 | AT2G29950 | protein ELF4-like 1 (ELF4-L1)                                                        |

|     |              |      |           |                                                                     |
|-----|--------------|------|-----------|---------------------------------------------------------------------|
| 171 | A_84_P822530 | 2.15 | AT2G30360 | CBL-interacting serine/threonine-protein kinase 11 (SIP4)           |
| 172 | A_84_P788262 | 2.12 | AT2G30480 | unknown protein                                                     |
| 173 | A_84_P600694 | 2.65 | AT2G30900 | trichome birefringence-like 43 protein (TBL43)                      |
| 174 | A_84_P99106  | 2.25 | AT2G31081 | protein CLAVATA3/ESR-related 4 (CLE4)                               |
| 175 | A_84_P790237 | 2.62 | AT2G31083 | protein CLAVATA3/ESR-related 5 (CLE5)                               |
| 176 | A_84_P21126  | 3.53 | AT2G32020 | GCN5-related N-acetyltransferase-like protein                       |
| 177 | A_84_P20115  | 3.38 | AT2G32780 | ubiquitin carboxyl-terminal hydrolase 1 (UBP1)                      |
| 178 | A_84_P573078 | 3.04 | AT2G32890 | protein ralf-like 17 (RALFL17)                                      |
| 179 | A_84_P17235  | 2.46 | AT2G34080 | cysteine proteinase-like protein                                    |
| 180 | A_84_P23919  | 2.32 | AT2G35980 | late embryogenesis abundant hydroxyproline-rich glycoprotein (YLS9) |
| 181 | A_84_P757419 | 4.75 | AT2G36255 | putative defensin-like protein 203                                  |
| 182 | A_84_P793801 | 2.41 | AT2G36390 | 1,4-alpha-glucan branching enzyme (SBE2.1)                          |
| 183 | A_84_P539391 | 3.73 | AT2G37370 | hypothetical protein                                                |
| 184 | A_84_P14480  | 2.35 | AT2G38250 | DNA-binding protein                                                 |
| 185 | A_84_P10708  | 4.23 | AT2G38340 | dehydration-responsive element-binding protein 2E                   |
| 186 | A_84_P606057 | 2.48 | AT2G38350 | hypothetical protein                                                |
| 187 | A_84_P836887 | 2.82 | AT2G39200 | MLO-like protein 12 (MLO12)                                         |
| 188 | A_84_P868076 | 2.36 | AT2G39518 | UPF0497 membrane protein                                            |
| 189 | A_84_P19148  | 4.28 | AT2G40210 | protein agamous-like 48 (AGL48)                                     |
| 190 | A_84_P174151 | 2.19 | AT2G40330 | abscisic acid receptor PYL6 (PYL6)                                  |
| 191 | A_84_P179004 | 3.71 | AT2G40470 | LOB domain-containing protein 15 (LBD15)                            |
| 192 | A_84_P816205 | 4.34 | AT2G40940 | ethylene response sensor 1 (ERS1)                                   |
| 193 | A_84_P21103  | 2.43 | AT2G41480 | peroxidase superfamily protein                                      |
| 194 | A_84_P154655 | 3.51 | AT2G41730 | hypothetical protein                                                |
| 195 | A_84_P525206 | 4.77 | AT2G42820 | HVA22-like protein f (HVA22F)                                       |

|     |              |      |           |                                                                        |
|-----|--------------|------|-----------|------------------------------------------------------------------------|
| 196 | A_84_P819816 | 2.35 | AT2G43018 | hypothetical protein (CPuORF17)                                        |
| 197 | A_84_P15331  | 3.13 | AT2G43620 | chitinase-like protein                                                 |
| 198 | A_84_P796962 | 2.99 | AT2G44000 | late embryogenesis abundant hydroxyproline-rich glycoprotein           |
| 199 | A_84_P824802 | 3.66 | AT2G44370 | cysteine/histidine-rich C1 domain-containing protein                   |
| 200 | A_84_P832916 | 2.57 | AT2G44380 | cysteine/histidine-rich C1 domain-containing protein                   |
| 201 | A_84_P112142 | 2.06 | AT2G44420 | protein N-terminal asparagine amidohydrolase family protein            |
| 202 | A_84_P17343  | 2.21 | AT2G44840 | ethylene-responsive transcription factor 13 (ERF13)                    |
| 203 | A_84_P557122 | 3.47 | AT2G45130 | SPX domain-containing protein 3 (SPX3)                                 |
| 204 | A_84_P550912 | 3.58 | AT2G45135 | RING/U-box superfamily protein                                         |
| 205 | A_84_P830119 | 2.12 | AT2G46240 | Bcl-2-associated athanogene protein (BAG6)                             |
| 206 | A_84_P602531 | 4.53 | AT2G46880 | purple acid phosphatase 14 (PAP14)                                     |
| 207 | A_84_P17348  | 3.25 | AT2G47000 | ABC transporter B family member 4 (ABCB4)                              |
| 208 | A_84_P23846  | 2.70 | AT2G47180 | galactinol synthase (GOLS1)                                            |
| 209 | A_84_P23870  | 2.39 | AT2G47520 | ethylene-responsive transcription factor ERF071 (HRE2)                 |
| 210 | A_84_P19142  | 4.04 | AT2G47750 | putative indole-3-acetic acid-amido synthetase GH3.9 (GH3.9)           |
| 211 | A_84_P796180 | 2.91 | AT2G48010 | putative LRR receptor-like serine/threonine-protein kinase RKF3 (RKF3) |
| 212 | A_84_P601268 | 3.58 | AT3G01600 | NAC domain containing protein 44 (NAC044)                              |
| 213 | A_84_P610533 | 2.34 | AT3G02030 | transferase                                                            |
| 214 | A_84_P856982 | 2.64 | AT3G02040 | senescence-related protein (SRG3)                                      |
| 215 | A_84_P598098 | 2.80 | AT3G03270 | adenine nucleotide alpha hydrolases-like protein                       |
| 216 | A_84_P820770 | 2.90 | AT3G03990 | alpha/beta-hydrolase domain-containing protein                         |
| 217 | A_84_P809277 | 2.54 | AT3G04120 | cytosolic GADPH C subunit (GAPC1)                                      |
| 218 | A_84_P608372 | 3.75 | AT3G04410 | no apical meristem-domain containing transcriptional regulator         |
| 219 | A_84_P18331  | 3.32 | AT3G04530 | phosphoenolpyruvate carboxylase kinase 2 (PPCK2)                       |
| 220 | A_84_P19266  | 3.56 | AT3G04690 | receptor-like protein kinase ANXUR1 (ANX1)                             |

|     |              |      |           |                                                                             |
|-----|--------------|------|-----------|-----------------------------------------------------------------------------|
| 221 | A_84_P23982  | 3.49 | AT3G04800 | translocase inner membrane subunit 23-3 (TIM23-3)                           |
| 222 | A_84_P20190  | 2.00 | AT3G05180 | GDSL esterase/lipase                                                        |
| 223 | A_84_P832164 | 2.19 | AT3G05750 | hypothetical protein                                                        |
| 224 | A_84_P22108  | 2.34 | AT3G05790 | lon protease 4 (LON4)                                                       |
| 225 | A_84_P188714 | 4.01 | AT3G06390 | hypothetical protein                                                        |
| 226 | A_84_P793078 | 2.94 | AT3G06455 | ubiquitin family protein                                                    |
| 227 | A_84_P21146  | 3.30 | AT3G07450 | protease inhibitor/seed storage/lipid transfer protein (LTP) family protein |
| 228 | A_84_P17379  | 2.98 | AT3G09640 | L-ascorbate peroxidase (APX2)                                               |
| 229 | A_84_P587419 | 4.28 | AT3G09922 | induced by phosphate starvation1 (IPS1)                                     |
| 230 | A_84_P280890 | 2.20 | AT3G10320 | glycosyltransferase family 61 protein                                       |
| 231 | A_84_P297294 | 2.52 | AT3G10500 | NAC domain containing protein 53 (NAC053)                                   |
| 232 | A_84_P12726  | 2.94 | AT3G11020 | dehydration-responsive element-binding protein 2B (DREB2B)                  |
| 233 | A_84_P74014  | 4.89 | AT3G11340 | UDP-glycosyltransferase-like protein                                        |
| 234 | A_84_P547432 | 2.95 | AT3G11920 | glutaredoxin-related protein                                                |
| 235 | A_84_P849770 | 2.59 | AT3G13110 | serine acetyltransferase 3 (SERAT2)                                         |
| 236 | A_84_P793924 | 3.81 | AT3G14310 | pectinesterase 3 (PME3)                                                     |
| 237 | A_84_P515522 | 4.92 | AT3G14395 | hypothetical protein                                                        |
| 238 | A_84_P18370  | 3.17 | AT3G14490 | terpene cyclase, C1 domain-containing protein                               |
| 239 | A_84_P11721  | 2.00 | AT3G15500 | NAC domain-containing protein 55 (NAC3)                                     |
| 240 | A_84_P762419 | 2.84 | AT3G15518 | hypothetical protein                                                        |
| 241 | A_84_P571397 | 2.27 | AT3G15930 | pentatricopeptide repeat-containing protein                                 |
| 242 | A_84_P18342  | 2.83 | AT3G16050 | pyridocine biosynthesis 1.2 (PDX1.2)                                        |
| 243 | A_84_P21184  | 2.43 | AT3G17790 | expression is upregulated in the shoot of cax1/cax3 mutant (PAP17)          |
| 244 | A_84_P855891 | 3.31 | AT3G18240 | ribosomal protein S24/S35                                                   |
| 245 | A_84_P183584 | 3.27 | AT3G18740 | 60S ribosomal protein L30-3                                                 |

|     |              |      |           |                                                                      |
|-----|--------------|------|-----------|----------------------------------------------------------------------|
| 246 | A_84_P17407  | 2.93 | AT3G19430 | late embryogenesis abundant protein-like protein                     |
| 247 | A_84_P11767  | 3.22 | AT3G21050 | copia-like retrotransposon family protein                            |
| 248 | A_84_P758751 | 3.11 | AT3G22000 | cysteine-rich repeat secretory protein 30                            |
| 249 | A_84_P580314 | 2.97 | AT3G22235 | hypothetical protein                                                 |
| 250 | A_84_P17416  | 2.03 | AT3G23010 | receptor like protein 36 (RLP36)                                     |
| 251 | A_84_P761143 | 3.5  | AT3G23165 | putative defensin-like protein 187 (LCR42)                           |
| 252 | A_84_P21194  | 3.77 | AT3G23240 | ethylene response factor 1 (ERF1)                                    |
| 253 | A_84_P762442 | 2.97 | AT3G23326 | unknown protein                                                      |
| 254 | A_84_P508448 | 2.38 | AT3G23870 | hypothetical protein                                                 |
| 255 | A_84_P13631  | 3.42 | AT3G25190 | nodulin-like protein 21                                              |
| 256 | A_84_P17413  | 2.28 | AT3G25230 | FK506 binding protein (FKBP62)                                       |
| 257 | A_84_P791120 | 4.01 | AT3G25240 | hypothetical protein                                                 |
| 258 | A_84_P18359  | 2.31 | AT3G25250 | serine/threonine-protein kinase OXII (AGC2-1)                        |
| 259 | A_84_P15531  | 2.16 | AT3G26500 | plant intracellular ras group-related LRR 2 (PIRL2)                  |
| 260 | A_84_P851910 | 3.12 | AT3G26510 | octicosapeptide/Phox/Bem1p domain-containing protein                 |
| 261 | A_84_P13615  | 3.07 | AT3G26820 | esterase/lipase/thioesterase family protein                          |
| 262 | A_84_P14560  | 2.25 | AT3G26830 | cytochrome P450 71B15 (PAD3)                                         |
| 263 | A_84_P604401 | 2.21 | AT3G27630 | hypothetical protein                                                 |
| 264 | A_84_P22181  | 2.01 | AT3G28210 | zinc finger AN1 domain-containing stress-associated protein 12 (PMZ) |
| 265 | A_84_P12725  | 4.39 | AT3G28510 | AAA-type ATPase family protein                                       |
| 266 | A_84_P582125 | 2.52 | AT3G28570 | AAA-type ATPase family protein                                       |
| 267 | A_84_P84999  | 3.02 | AT3G28580 | AAA-type ATPase family protein                                       |
| 268 | A_84_P22146  | 4.14 | AT3G29250 | rossmann-fold NAD(P)-binding domain-containing protein               |
| 269 | A_84_P506690 | 2.66 | AT3G29265 | similar to zinc knuckle (CCHC-type) family protein                   |
| 270 | A_84_P574116 | 3.04 | AT3G29610 | unknown protein                                                      |

|     |              |      |           |                                                                    |
|-----|--------------|------|-----------|--------------------------------------------------------------------|
| 271 | A_84_P842786 | 3.04 | AT3G29634 | unknown protein                                                    |
| 272 | A_84_P759506 | 4.01 | AT3G30746 | CACTA-like transposase family protein                              |
| 273 | A_84_P758996 | 3.05 | AT3G32360 | non-LTR retrotransposon family protein                             |
| 274 | A_84_P762591 | 2.81 | AT3G42047 | unknown protein                                                    |
| 275 | A_84_P760582 | 2.87 | AT3G42220 | CACTA-like transposase family protein                              |
| 276 | A_84_P759333 | 2.95 | AT3G42320 | unknown protein                                                    |
| 277 | A_84_P573240 | 3.12 | AT3G43110 | hypothetical protein                                               |
| 278 | A_84_P761085 | 3.86 | AT3G43833 | hypothetical protein                                               |
| 279 | A_84_P790714 | 2.90 | AT3G44510 | alpha/beta-hydrolases family protein                               |
| 280 | A_84_P16522  | 3.12 | AT3G45640 | mitogen-activated protein kinase 3 (MPK3)                          |
| 281 | A_84_P840283 | 2.17 | AT3G46250 | similar to leaf senescence-associated receptor-like protein kinase |
| 282 | A_84_P11802  | 2.47 | AT3G46690 | UDP-glycosyltransferase-like protein                               |
| 283 | A_84_P810552 | 3.70 | AT3G48360 | BTB and TAZ domain protein 2 (BT2)                                 |
| 284 | A_84_P569671 | 2.00 | AT3G48640 | hypothetical protein                                               |
| 285 | A_84_P15590  | 3.28 | AT3G48850 | phosphate transporter 3;2 (PHT3;2)                                 |
| 286 | A_84_P533343 | 2.68 | AT3G49307 | hypothetical protein                                               |
| 287 | A_84_P20325  | 4.53 | AT3G50060 | MYB domain protein 77 (MYB77)                                      |
| 288 | A_84_P591083 | 4.67 | AT3G51410 | hypothetical protein                                               |
| 289 | A_84_P10877  | 5.01 | AT3G51590 | non-specific lipid-transfer protein 12 (LTP12)                     |
| 290 | A_84_P23171  | 2.12 | AT3G51910 | heat stress transcription factor                                   |
| 291 | A_84_P24129  | 3.32 | AT3G54340 | floral homeotic protein APETALA 3 (AP3)                            |
| 292 | A_84_P717824 | 2.43 | AT3G54925 | self-incompatibility S1 family protein                             |
| 293 | A_84_P760665 | 2.42 | AT3G55310 | rossmann-fold NAD(P)-binding domain-containing protein             |
| 294 | A_84_P760391 | 2.24 | AT3G55650 | pyruvate kinase                                                    |
| 295 | A_84_P797685 | 2.05 | AT3G55950 | putative serine/threonine-protein kinase-like protein CCR3 (CCR3)  |

|     |              |      |           |                                                                                         |
|-----|--------------|------|-----------|-----------------------------------------------------------------------------------------|
| 296 | A_84_P19408  | 4.96 | AT3G56280 | kinase family protein                                                                   |
| 297 | A_84_P13736  | 2.72 | AT3G56540 | putative serine carboxypeptidase-like 53                                                |
| 298 | A_84_P15628  | 4.58 | AT3G57240 | beta-1,3-glucanase 3 (BG3)                                                              |
| 299 | A_84_P608003 | 4.74 | AT3G58150 | optic atrophy 3 protein (OPA3)                                                          |
| 300 | A_84_P832328 | 3.03 | AT3G58590 | pentatricopeptide repeat-containing protein                                             |
| 301 | A_84_P760632 | 2.81 | AT3G59930 | defensin-like protein 206                                                               |
| 302 | A_84_P761115 | 5.19 | AT3G60966 | protein binding / zinc ion binding protein                                              |
| 303 | A_84_P557300 | 3.63 | AT3G62380 | hypothetical protein                                                                    |
| 304 | A_84_P778821 | 3.85 | AT3G62770 | protein required for autophagosome formation during nutrient deprivation and senescence |
| 305 | A_84_P786422 | 2.03 | AT3G63060 | F-box protein (EDL3)                                                                    |
| 306 | A_84_P787728 | 4.13 | AT4G01350 | cysteine/histidine-rich C1 domain-containing protein                                    |
| 307 | A_84_P13773  | 2.65 | AT4G01830 | ABC transporter B family member 5 (PGP5)                                                |
| 308 | A_84_P868011 | 2.23 | AT4G02380 | late embryogenesis abundant like protein (SAG21)                                        |
| 309 | A_84_P24179  | 2.29 | AT4G02390 | poly [ADP-ribose] polymerase 2 (PP)                                                     |
| 310 | A_84_P16615  | 2.25 | AT4G03320 | translocon at the inner envelope membrane of chloroplasts 20-IV (Tic20-IV)              |
| 311 | A_84_P506777 | 3.69 | AT4G03360 | ubiquitin family protein                                                                |
| 312 | A_84_P529840 | 4.07 | AT4G04480 | hypothetical protein                                                                    |
| 313 | A_84_P10002  | 2.13 | AT4G04810 | methionine sulfoxide reductase B 4 (MSRB4)                                              |
| 314 | A_84_P16622  | 5.08 | AT4G05380 | AAA-type ATPase family protein                                                          |
| 315 | A_84_P763795 | 2.13 | AT4G05616 | unknown protein                                                                         |
| 316 | A_84_P764232 | 2.86 | AT4G08136 | similar to purple acid phosphatase                                                      |
| 317 | A_84_P598283 | 4.53 | AT4G08730 | RNA-binding protein                                                                     |
| 318 | A_84_P15681  | 3.65 | AT4G08970 | mutator-like transposase family protein                                                 |
| 319 | A_84_P12851  | 2.12 | AT4G10500 | oxidoreductase, 2OG-Fe(II) oxygenase family protein                                     |
| 320 | A_84_P55910  | 3.26 | AT4G11070 | putative WRKY transcription factor 41 (WRKY41)                                          |



|     |              |      |           |                                                                                      |
|-----|--------------|------|-----------|--------------------------------------------------------------------------------------|
| 321 | A_84_P15691  | 2.11 | AT4G11460 | putative cysteine-rich receptor-like protein kinase 30 (CRK30)                       |
| 322 | A_84_P827314 | 2.07 | AT4G11890 | protein kinase family protein                                                        |
| 323 | A_84_P20423  | 2.04 | AT4G12090 | cornichon family protein                                                             |
| 324 | A_84_P784501 | 3.08 | AT4G12350 | myb domain protein 42 (MYB42)                                                        |
| 325 | A_84_P826776 | 3.32 | AT4G12400 | carboxylate clamp-tetratricopeptide repeat proteins                                  |
| 326 | A_84_P18533  | 2.62 | AT4G12470 | azelaic acid induced 1 (AZI1)                                                        |
| 327 | A_84_P505907 | 4.35 | AT4G12735 | hypothetical protein                                                                 |
| 328 | A_84_P19482  | 4.93 | AT4G13300 | terpenoid synthase 13 (TPS13)                                                        |
| 329 | A_84_P16645  | 3.23 | AT4G13480 | myb domain protein 79 (MYB79)                                                        |
| 330 | A_84_P595614 | 2.40 | AT4G14390 | ankyrin repeat-containing protein                                                    |
| 331 | A_84_P243495 | 4.21 | AT4G15660 | monothiol glutaredoxin-S8                                                            |
| 332 | A_84_P53340  | 3.80 | AT4G15670 | monothiol glutaredoxin-S7                                                            |
| 333 | A_84_P127561 | 3.28 | AT4G15680 | monothiol glutaredoxin-S4                                                            |
| 334 | A_84_P178304 | 3.27 | AT4G15690 | monothiol glutaredoxin-S5                                                            |
| 335 | A_84_P278800 | 2.94 | AT4G15700 | monothiol glutaredoxin-S3                                                            |
| 336 | A_84_P791730 | 4.19 | AT4G16230 | carboxylesterase/ hydrolase                                                          |
| 337 | A_84_P18639  | 2.84 | AT4G16270 | peroxidase 40                                                                        |
| 338 | A_84_P290684 | 2.54 | AT4G17490 | ethylene response factor subfamily B-3 of ERF/AP2 transcription factor family (ERF6) |
| 339 | A_84_P763867 | 3.00 | AT4G17587 | hAT-like transposase family protein                                                  |
| 340 | A_84_P14860  | 3.49 | AT4G17690 | peroxidase 41                                                                        |
| 341 | A_84_P572459 | 2.71 | AT4G18335 | hypothetical protein                                                                 |
| 342 | A_84_P22325  | 2.08 | AT4G18450 | ethylene response factor subfamily B-3 of ERF/AP2 transcription factor family (ERF)  |
| 343 | A_84_P587613 | 3.28 | AT4G18540 | hypothetical protein                                                                 |
| 344 | A_84_P226889 | 4.39 | AT4G20000 | VQ motif-containing protein                                                          |
| 345 | A_84_P529887 | 3.64 | AT4G20190 | hypothetical protein                                                                 |

|     |              |      |           |                                                                                         |
|-----|--------------|------|-----------|-----------------------------------------------------------------------------------------|
| 346 | A_84_P11935  | 4.90 | AT4G21490 | NADH dehydrogenase (NDB3)                                                               |
| 347 | A_84_P12882  | 2.27 | AT4G22020 | hypothetical protein                                                                    |
| 348 | A_84_P15720  | 2.14 | AT4G22620 | SAUR-like auxin-responsive protein                                                      |
| 349 | A_84_P764039 | 2.57 | AT4G22960 | hypothetical protein                                                                    |
| 350 | A_84_P188254 | 2.13 | AT4G23140 | cysteine-rich receptor-like protein kinase 6 (CRK6)                                     |
| 351 | A_84_P13831  | 2.08 | AT4G23150 | cysteine-rich receptor-like protein kinase 7 (CRK7)                                     |
| 352 | A_84_P556490 | 2.00 | AT4G23493 | unknown protein                                                                         |
| 353 | A_84_P763290 | 2.27 | AT4G23810 | putative WRKY transcription factor 53 (WRKY53)                                          |
| 354 | A_84_P10055  | 2.71 | AT4G24240 | Ca-dependent calmodulin binding protein (WRKY7)                                         |
| 355 | A_84_P513046 | 2.22 | AT4G25110 | metacaspase 2 (MC2)                                                                     |
| 356 | A_84_P13841  | 2.43 | AT4G25380 | stress-associated protein 10 (SAP10)                                                    |
| 357 | A_84_P263290 | 4.14 | AT4G25400 | transcription factor bHLH118                                                            |
| 358 | A_84_P575144 | 2.37 | AT4G25510 | hypothetical protein                                                                    |
| 359 | A_84_P15733  | 3.96 | AT4G25590 | actin depolymerizing factor 7 (ADF7)                                                    |
| 360 | A_84_P510398 | 2.91 | AT4G25930 | hypothetical protein                                                                    |
| 361 | A_84_P860589 | 2.34 | AT4G26700 | fimbrin 1 (FIM1)                                                                        |
| 362 | A_84_P11959  | 2.68 | AT4G26930 | myb domain protein 97 (MYB97)                                                           |
| 363 | A_84_P11961  | 2.33 | AT4G27410 | NAC domain-containing protein 72 (RD26)                                                 |
| 364 | A_84_P860489 | 3.11 | AT4G27440 | protochlorophyllide oxidoreductase B (PORB)                                             |
| 365 | A_84_P599242 | 2.61 | AT4G28395 | bifunctional inhibitor/lipid-transfer protein/seed storage 2S albumin-like protein (A7) |
| 366 | A_84_P837229 | 2.21 | AT4G28790 | transcription factor bHLH23                                                             |
| 367 | A_84_P135955 | 4.14 | AT4G29980 | hypothetical protein                                                                    |
| 368 | A_84_P12918  | 3.16 | AT4G30120 | cadmium/zinc-transporting ATPase 4 (HMA3)                                               |
| 369 | A_84_P11034  | 3.08 | AT4G31370 | FASCICLIN-like arabinogalactan protein 5 precursor (FLA5)                               |
| 370 | A_84_P55550  | 2.61 | AT4G32280 | auxin-responsive protein IAA29 (IAA29)                                                  |

|     |              |      |           |                                                             |
|-----|--------------|------|-----------|-------------------------------------------------------------|
| 371 | A_84_P11987  | 3.21 | AT4G33420 | peroxidase superfamily protein                              |
| 372 | A_84_P11046  | 3.11 | AT4G34410 | redox responsive transcription factor 1 (RRTF1)             |
| 373 | A_84_P826278 | 2.55 | AT4G34520 | 3-ketoacyl-CoA synthase 18 (KCS18)                          |
| 374 | A_84_P13883  | 2.71 | AT4G34850 | chalcone and stilbene synthase family protein (LAP5)        |
| 375 | A_84_P12940  | 2.71 | AT4G35180 | LYS/HIS transporter 7 (LHT7)                                |
| 376 | A_84_P613474 | 2.92 | AT4G35210 | hypothetical protein                                        |
| 377 | A_84_P612444 | 2.12 | AT4G35770 | senescence 1 (SEN1)                                         |
| 378 | A_84_P14864  | 3.67 | AT4G37260 | MYB domain protein 73 (MYB73)                               |
| 379 | A_84_P12956  | 2.90 | AT4G39830 | putative L-ascorbate oxidase                                |
| 380 | A_84_P13921  | 2.56 | AT5G01330 | pyruvate decarboxylase-3 (PDC3)                             |
| 381 | A_84_P22436  | 2.45 | AT5G01900 | putative WRKY transcription factor 62 (WRKY62)              |
| 382 | A_84_P793290 | 2.61 | AT5G02540 | rossmann-fold NAD(P)-binding domain-containing protein      |
| 383 | A_84_P21717  | 2.54 | AT5G04210 | CCCH-type zinc fingerfamily protein with RNA-binding domain |
| 384 | A_84_P14878  | 3.22 | AT5G04950 | nicotianamine synthase 1 (NAS1)                             |
| 385 | A_84_P16771  | 2.06 | AT5G05290 | expansin A2 (EXPA2)                                         |
| 386 | A_84_P822865 | 2.65 | AT5G05410 | dehydration-responsive element-binding protein 2A (DREB2A)  |
| 387 | A_84_P194044 | 2.38 | AT5G07330 | unknown protein                                             |
| 388 | A_84_P232289 | 3.94 | AT5G09570 | Cox19-like CHCH family protein                              |
| 389 | A_84_P769325 | 4.70 | AT5G11412 | RNA-binding (RRM/RBD/RNP motifs) family protein             |
| 390 | A_84_P227239 | 2.33 | AT5G13210 | hypothetical protein                                        |
| 391 | A_84_P17744  | 4.42 | AT5G13380 | auxin-responsive GH3 family protein                         |
| 392 | A_84_P264370 | 2.86 | AT5G14000 | NAC domain containing protein 84 (NAC084)                   |
| 393 | A_84_P11129  | 2.63 | AT5G14180 | triacylglycerol lipase 2 (MPL1)                             |
| 394 | A_84_P174131 | 2.47 | AT5G14730 | hypothetical protein                                        |
| 395 | A_84_P818199 | 4.08 | AT5G15800 | developmental protein SEPALLATA 1                           |

|     |              |      |           |                                                                                  |
|-----|--------------|------|-----------|----------------------------------------------------------------------------------|
| 396 | A_84_P18704  | 4.40 | AT5G18990 | putative pectinesterase 55                                                       |
| 397 | A_84_P785492 | 2.13 | AT5G20230 | blue copper binding protein (SAG14)                                              |
| 398 | A_84_P767270 | 3.85 | AT5G20240 | floral homeotic protein PISTILLATA (PI)                                          |
| 399 | A_84_P130356 | 3.02 | AT5G20790 | hypothetical protein                                                             |
| 400 | A_84_P262640 | 4.78 | AT5G22430 | pollen Ole e 1 allergen and extensin family protein                              |
| 401 | A_84_P845967 | 4.32 | AT5G22570 | putative WRKY transcription factor 38 (WRKY38)                                   |
| 402 | A_84_P600237 | 3.11 | AT5G23700 | hypothetical protein                                                             |
| 403 | A_84_P769153 | 3.33 | AT5G23908 | hypothetical protein                                                             |
| 404 | A_84_P76184  | 3.48 | AT5G24110 | WRKY DNA-binding protein 30 (WRKY30)                                             |
| 405 | A_84_P592228 | 2.22 | AT5G24280 | gamma-irradiation and mitomycin c induced 1 (GMI1)                               |
| 406 | A_84_P181424 | 4.32 | AT5G24640 | hypothetical protein                                                             |
| 407 | A_84_P14930  | 2.15 | AT5G24820 | aspartyl protease family protein                                                 |
| 408 | A_84_P13041  | 3.15 | AT5G24960 | cytochrome P450 71A14 (CYP71A14)                                                 |
| 409 | A_84_P766473 | 2.63 | AT5G25260 | flotillin-like protein 2                                                         |
| 410 | A_84_P826815 | 3.03 | AT5G25390 | a member of the ERF subfamily B-6 of ERF/AP2 transcription factor family (SHN3)  |
| 411 | A_84_P17772  | 3.67 | AT5G25810 | a member of the DREB subfamily A-4 of ERF/AP2 transcription factor family (TINY) |
| 412 | A_84_P787266 | 3.62 | AT5G26170 | putative WRKY transcription factor 50 (WRKY50)                                   |
| 413 | A_84_P577950 | 2.86 | AT5G26640 | hypothetical protein                                                             |
| 414 | A_84_P515865 | 2.08 | AT5G26690 | heavy-metal-associated domain-containing protein                                 |
| 415 | A_84_P121472 | 4.08 | AT5G26700 | putative germin-like protein subfamily 2 member 5                                |
| 416 | A_84_P196974 | 3.01 | AT5G26730 | fasciclin-like arabinogalactan family protein                                    |
| 417 | A_84_P768264 | 3.98 | AT5G27495 | defensin-like protein 113                                                        |
| 418 | A_84_P517787 | 2.62 | AT5G28590 | DNA-binding family protein                                                       |
| 419 | A_84_P580626 | 3.38 | AT5G28720 | hypothetical protein                                                             |
| 420 | A_84_P569042 | 2.66 | AT5G28810 | hypothetical protein                                                             |

|     |              |      |           |                                                                          |
|-----|--------------|------|-----------|--------------------------------------------------------------------------|
| 421 | A_84_P767369 | 2.17 | AT5G33355 | defensin-like protein 207                                                |
| 422 | A_84_P154985 | 3.21 | AT5G34358 | hypothetical protein                                                     |
| 423 | A_84_P283810 | 3.12 | AT5G34560 | similar to uridine kinase/uracil phosphoribosyl transferas               |
| 424 | A_84_P141219 | 2.73 | AT5G35320 | unknown protein                                                          |
| 425 | A_84_P766066 | 4.46 | AT5G36275 | gypsy-like retrotransposon family protein                                |
| 426 | A_84_P834366 | 2.47 | AT5G37415 | protein agamous-like 105 (AGL105)                                        |
| 427 | A_84_P17787  | 2.01 | AT5G37670 | HSP20-like chaperones superfamily protein                                |
| 428 | A_84_P610036 | 4.97 | AT5G38310 | hypothetical protein                                                     |
| 429 | A_84_P842018 | 3.49 | AT5G38870 | hypothetical protein                                                     |
| 430 | A_84_P569955 | 4.15 | AT5G39560 | F-box/kelch-repeat protein                                               |
| 431 | A_84_P16848  | 2.97 | AT5G39580 | peroxidase 62                                                            |
| 432 | A_84_P17794  | 2.17 | AT5G39610 | NAC-domain transcription factor (NAC2)                                   |
| 433 | A_84_P841049 | 4.00 | AT5G40050 | putative F-box protein                                                   |
| 434 | A_84_P14962  | 2.87 | AT5G40890 | chloride channel protein CLC-a (CLC-A)                                   |
| 435 | A_84_P547046 | 2.45 | AT5G41315 | transcription factor GLABRA 3 (GL3)                                      |
| 436 | A_84_P268790 | 2.42 | AT5G43350 | inorganic phosphate transporter 1-1 (PHT1;1)                             |
| 437 | A_84_P248373 | 3.34 | AT5G44420 | plant defensin 1.2 (PDF1.2)                                              |
| 438 | A_84_P22542  | 4.56 | AT5G44540 | tapetum specific protein TAP35/TAP44                                     |
| 439 | A_84_P830096 | 2.87 | AT5G44575 | hypothetical protein                                                     |
| 440 | A_84_P769565 | 3.39 | AT5G44585 | hypothetical protein                                                     |
| 441 | A_84_P767595 | 3.07 | AT5G44690 | hypothetical protein                                                     |
| 442 | A_84_P769053 | 4.29 | AT5G44894 | hypothetical protein                                                     |
| 443 | A_84_P20656  | 2.27 | AT5G46050 | peptide transporter PTR3-A (PTR3)                                        |
| 444 | A_84_P23495  | 3.93 | AT5G46360 | putative calcium-activated outward-rectifying potassium channel 3 (KCO3) |
| 445 | A_84_P810056 | 2.27 | AT5G46730 | glycine-rich protein                                                     |

|     |              |      |           |                                                                           |
|-----|--------------|------|-----------|---------------------------------------------------------------------------|
| 446 | A_84_P523886 | 2.23 | AT5G46960 | plant invertase/pectin methylesterase inhibitor domain-containing protein |
| 447 | A_84_P14045  | 2.25 | AT5G48430 | aspartyl protease family protein                                          |
| 448 | A_84_P241903 | 2.04 | AT5G50200 | nitrate transmembrane transporter (WR3)                                   |
| 449 | A_84_P15944  | 2.39 | AT5G50790 | nodulin MtN3-like protein                                                 |
| 450 | A_84_P567322 | 3.66 | AT5G50880 | hypothetical protein                                                      |
| 451 | A_84_P607405 | 2.16 | AT5G51090 | hypothetical protein                                                      |
| 452 | A_84_P296724 | 2.67 | AT5G51190 | ethylene response factor 105 (ERF105)                                     |
| 453 | A_84_P15946  | 2.02 | AT5G51440 | HSP20-like chaperones superfamily protein                                 |
| 454 | A_84_P525660 | 3.78 | AT5G52940 | hypothetical protein                                                      |
| 455 | A_84_P769609 | 2.70 | AT5G53048 | hypothetical protein                                                      |
| 456 | A_84_P521243 | 5.98 | AT5G53230 | hypothetical protein                                                      |
| 457 | A_84_P159285 | 4.67 | AT5G53240 | hypothetical protein                                                      |
| 458 | A_84_P832719 | 3.75 | AT5G53950 | protein CUP-SHAPED COTYLEDON 2 (CUC2)                                     |
| 459 | A_84_P12174  | 4.43 | AT5G54010 | glycosyltransferase domain-containing protein                             |
| 460 | A_84_P14064  | 2.59 | AT5G54030 | cysteine/histidine-rich C1 domain-containing protein                      |
| 461 | A_84_P834298 | 3.23 | AT5G54190 | protochlorophyllide reductase A (PORA)                                    |
| 462 | A_84_P165123 | 2.87 | AT5G54420 | hypothetical protein                                                      |
| 463 | A_84_P561123 | 3.48 | AT5G54450 | hypothetical protein                                                      |
| 464 | A_84_P548728 | 4.42 | AT5G54550 | hypothetical protein                                                      |
| 465 | A_84_P505286 | 3.47 | AT5G55110 | stigma-specific Stig1 family protein                                      |
| 466 | A_84_P75404  | 4.76 | AT5G55150 | hypothetical protein                                                      |
| 467 | A_84_P606546 | 3.98 | AT5G55270 | hypothetical protein                                                      |
| 468 | A_84_P540757 | 4.22 | AT5G55490 | gamete expressed protein 1 (GEX1)                                         |
| 469 | A_84_P830570 | 4.89 | AT5G56370 | FBD-associated F-box protein                                              |
| 470 | A_84_P16913  | 2.27 | AT5G57550 | xyloglucan:xyloglucosyl transferase (XTH25)                               |

|     |              |      |           |                                                                             |
|-----|--------------|------|-----------|-----------------------------------------------------------------------------|
| 471 | A_84_P557599 | 3.32 | AT5G57640 | GCK domain-containing protein                                               |
| 472 | A_84_P766510 | 2.98 | AT5G57770 | hypothetical protein                                                        |
| 473 | A_84_P10297  | 3.19 | AT5G57980 | RNA polymerase II fifth largest subunit, C (RPB5C)                          |
| 474 | A_84_P503599 | 2.10 | AT5G58610 | putative PHD finger transcription factor                                    |
| 475 | A_84_P132675 | 2.77 | AT5G58780 | dehydrodolichyl diphosphate synthase 3                                      |
| 476 | A_84_P10303  | 2.78 | AT5G59390 | XH/XS domain-containing protein                                             |
| 477 | A_84_P10306  | 4.79 | AT5G59930 | cysteine/histidine-rich C1 domain-containing protein                        |
| 478 | A_84_P19762  | 2.74 | AT5G60080 | protein kinase family protein                                               |
| 479 | A_84_P582506 | 2.78 | AT5G60480 | homeobox protein 26 (HB26)                                                  |
| 480 | A_84_P580715 | 2.71 | AT5G61490 | hypothetical protein                                                        |
| 481 | A_84_P11260  | 2.26 | AT5G61610 | oleosin-like protein                                                        |
| 482 | A_84_P842395 | 4.35 | AT5G62080 | protease inhibitor/seed storage/lipid transfer protein (LTP) family protein |
| 483 | A_84_P11264  | 4.25 | AT5G62480 | glutathione S-transferase tau 9 (GSTU9)                                     |
| 484 | A_84_P228049 | 2.32 | AT5G63160 | BTB and TAZ domain protein.                                                 |
| 485 | A_84_P13160  | 2.78 | AT5G64060 | NAC domain containing protein 103 (NAC103)                                  |
| 486 | A_84_P15050  | 3.45 | AT5G64100 | peroxidase 69                                                               |
| 487 | A_84_P16942  | 2.63 | AT5G64120 | peroxidase 71                                                               |
| 488 | A_84_P577170 | 2.19 | AT5G64190 | hypothetical protein                                                        |
| 489 | A_84_P784671 | 2.70 | AT5G64370 | beta-ureidopropionase (BETA-UP)                                             |
| 490 | A_84_P541664 | 3.02 | AT5G64905 | elicitor peptide 3 (PROPEP3)                                                |
| 491 | A_84_P541669 | 2.66 | AT5G64930 | regulator of pathogenesis-related (PR) genes (HYS1)                         |
| 492 | A_84_P11274  | 4.46 | AT5G65080 | K-box region and MADS-box transcription factor family protein (MAF5)        |
| 493 | A_84_P768988 | 3.89 | AT5G65533 | hypothetical protein                                                        |
| 494 | A_84_P21685  | 2.43 | AT5G67450 | zinc-finger protein 1 (ZF1)                                                 |

| <b>B</b> | <b>Probe Name</b> | <b>Fold change</b> | <b>TAIR Locus</b> | <b>Description</b>                                             |
|----------|-------------------|--------------------|-------------------|----------------------------------------------------------------|
| 1        | A_84_P299940      | -2.18              | AT1G01355         | putative endonuclease or glycosyl hydrolase                    |
| 2        | A_84_P12740       | -2.89              | AT1G02630         | nucleoside transporter-like protein                            |
| 3        | A_84_P24081       | -2.38              | AT1G02800         | endoglucanase 1 (CEL2)                                         |
| 4        | A_84_P535484      | -2.62              | AT1G03010         | phototropic-responsive NPH3 family protein                     |
| 5        | A_84_P20780       | -3.45              | AT1G03495         | HXXXD-type acyl-transferase-like protein                       |
| 6        | A_84_P21760       | -3.69              | AT1G03940         | HXXXD-type acyl-transferase family protein                     |
| 7        | A_84_P23653       | -2.49              | AT1G03990         | long-chain fatty alcohol dehydrogenase-like protein            |
| 8        | A_84_P16627       | -2.10              | AT1G06090         | delta-9 desaturase-like 1 protein                              |
| 9        | A_84_P11901       | -5.75              | AT1G06100         | delta-9 desaturase-like 2 protein                              |
| 10       | A_84_P540848      | -2.33              | AT1G06350         | delta-9 desaturase-like 4 protein                              |
| 11       | A_84_P832057      | -2.24              | AT1G06420         | hypothetical protein                                           |
| 12       | A_84_P754636      | -2.06              | AT1G07175         | hypothetical protein                                           |
| 13       | A_84_P14491       | -4.31              | AT1G07460         | putative concanavalin A-like lectin                            |
| 14       | A_84_P13512       | -2.29              | AT1G07650         | putative LRR receptor-like serine/threonine-protein kinase     |
| 15       | A_84_P16132       | -2.30              | AT1G08430         | aluminum-activated malate transporter 1 (ALMT1)                |
| 16       | A_84_P22749       | -3.80              | AT1G09260         | chaperone DnaJ-domain-containing protein                       |
| 17       | A_84_P838625      | -2.10              | AT1G10410         | hypothetical protein                                           |
| 18       | A_84_P12357       | -3.80              | AT1G10480         | zinc finger protein 5 (ZFP5)                                   |
| 19       | A_84_P16179       | -3.29              | AT1G10980         | lung seven transmembrane receptor-containing protein           |
| 20       | A_84_P15234       | -3.97              | AT1G11080         | carboxypeptidase C                                             |
| 21       | A_84_P555923      | -2.17              | AT1G11120         | hypothetical protein                                           |
| 21       | A_84_P529333      | -2.41              | AT1G11420         | agenet domain-containing protein (DUF2)                        |
| 22       | A_84_P18040       | -2.98              | AT1G11600         | cytochrome P450, family 77, subfamily B, polypeptide (CYP77B1) |



|    |              |       |           |                                                                  |
|----|--------------|-------|-----------|------------------------------------------------------------------|
| 23 | A_84_P829384 | -2.21 | AT1G11765 | self-incompatibility protein S1 family                           |
| 24 | A_84_P19444  | -2.30 | AT1G12160 | flavin-binding monooxygenase family protein                      |
| 25 | A_84_P754046 | -2.37 | AT1G12451 | hypothetical protein                                             |
| 26 | A_84_P562094 | -2.45 | AT1G13200 | putative F-box/kelch-repeat protein                              |
| 27 | A_84_P23806  | -2.81 | AT1G13600 | basic leucine-zipper 58 (bZIP58)                                 |
| 28 | A_84_P15293  | -5.59 | AT1G13710 | cytochrome P450, family 78, subfamily A, polypeptide 5 (CYP78A5) |
| 29 | A_84_P23635  | -2.82 | AT1G14070 | fucosyltransferase 7 (FUT7)                                      |
| 30 | A_84_P18992  | -2.07 | AT1G15210 | ABC transporter G family member 35 (PDR7)                        |
| 31 | A_84_P837201 | -2.33 | AT1G16530 | LOB domain-containing protein 3 (ASL9)                           |
| 32 | A_84_P585313 | -2.77 | AT1G16705 | p300/CBP acetyltransferase-related protein                       |
| 33 | A_84_P21833  | -2.52 | AT1G17020 | protein SRG1                                                     |
| 34 | A_84_P18126  | -2.00 | AT1G18250 | thaumatin-like protein (ATLP-1)                                  |
| 35 | A_84_P795916 | -2.14 | AT1G18835 | mini zinc finger (MIF3)                                          |
| 36 | A_84_P20976  | -3.65 | AT1G19210 | ethylene-responsive transcription factor ERF017                  |
| 37 | A_84_P845705 | -2.69 | AT1G19630 | cytochrome P450, family 722, subfamily A, polypeptide (CYP722A1) |
| 38 | A_84_P12569  | -2.81 | AT1G19830 | SAUR-like auxin-responsive protein                               |
| 39 | A_84_P750377 | -3.31 | AT1G21220 | copia-like retrotransposon family protein                        |
| 40 | A_84_P16206  | -3.90 | AT1G21340 | dof zinc finger protein DOF1.2                                   |
| 41 | A_84_P14793  | -2.83 | AT1G21890 | nodulin MtN21 /EamA-like transporter-like protein                |
| 42 | A_84_P14346  | -2.49 | AT1G22150 | sulfate transporter 1.3 (SULTR1;3)                               |
| 43 | A_84_P590665 | -2.59 | AT1G22220 | F-box protein                                                    |
| 44 | A_84_P18059  | -3.02 | AT1G22480 | plastocyanin-like domain-containing protein                      |
| 45 | A_84_P21770  | -2.85 | AT1G23060 | hypothetical protein                                             |
| 46 | A_84_P22490  | -3.39 | AT1G23380 | homeobox protein knotted-1-like 6 (KNAT6)                        |
| 47 | A_84_P830332 | -3.91 | AT1G23520 | hypothetical protein                                             |

|    |              |       |           |                                                         |
|----|--------------|-------|-----------|---------------------------------------------------------|
| 48 | A_84_P14672  | -2.21 | AT1G23850 | hypothetical protein                                    |
| 49 | A_84_P17520  | -2.03 | AT1G24070 | putative mannan synthase 10 (CSLA10)                    |
| 50 | A_84_P23663  | -2.94 | AT1G24220 | paired amphipathic helix repeat-containing protein      |
| 51 | A_84_P13408  | -2.80 | AT1G25460 | rossmann-fold NAD(P)-binding domain-containing protein  |
| 52 | A_84_P19081  | -2.55 | AT1G25530 | lysine histidine transporter-like 6                     |
| 53 | A_84_P22656  | -3.21 | AT1G28290 | arabinogalactan protein 31 (AGP31)                      |
| 54 | A_84_P852475 | -2.56 | AT1G28390 | serine/threonine-protein kinase-like protein            |
| 55 | A_84_P12872  | -4.78 | AT1G29270 | hypothetical protein                                    |
| 56 | A_84_P752986 | -2.69 | AT1G30040 | gibberellin 2-beta-dioxygenase 2 (GA2OX2)               |
| 57 | A_84_P588887 | -2.07 | AT1G30140 | hypothetical protein                                    |
| 58 | A_84_P14247  | -4.53 | AT1G30650 | putative WRKY transcription factor 14 (WRKY14)          |
| 59 | A_84_P22675  | -4.88 | AT1G30760 | FAD-binding and BBE domain-containing protein           |
| 60 | A_84_P21757  | -2.70 | AT1G31040 | PLATZ transcription factor family protein               |
| 61 | A_84_P11538  | -4.53 | AT1G31490 | HXXXD-type acyl-transferase-like protein                |
| 62 | A_84_P14372  | -3.74 | AT1G31710 | putative copper amine oxidase                           |
| 63 | A_84_P159635 | -2.97 | AT1G31840 | tetratricopeptide repeat (TPR)-like superfamily protein |
| 64 | A_84_P752958 | -4.92 | AT1G32337 | hypothetical protein                                    |
| 65 | A_84_P751199 | -2.33 | AT1G33740 | similar to chaperonin 60 beta precursor                 |
| 66 | A_84_P16068  | -2.18 | AT1G33790 | jacalin lectin family protein                           |
| 67 | A_84_P13351  | -4.93 | AT1G33910 | putative avirulence-responsive protein                  |
| 68 | A_84_P10523  | -3.17 | AT1G34040 | pyridoxal phosphate -dependent transferase-like protein |
| 69 | A_84_P750745 | -4.05 | AT1G34095 | hypothetical protein                                    |
| 70 | A_84_P837120 | -3.5  | AT1G34650 | homeobox-leucine zipper protein (HDG10)                 |
| 71 | A_84_P842584 | -2.72 | AT1G35030 | hypothetical protein                                    |
| 72 | A_84_P821712 | -2.14 | AT1G35140 | phosphate-responsive 1-like protein (PHI-1)             |

|    |              |       |           |                                                                           |
|----|--------------|-------|-----------|---------------------------------------------------------------------------|
| 73 | A_84_P752095 | -2.03 | AT1G35270 | hypothetical protein                                                      |
| 74 | A_84_P835109 | -2.13 | AT1G35625 | RING/U-box domain-containing protein                                      |
| 75 | A_84_P753580 | -3.05 | AT1G36078 | hypothetical protein                                                      |
| 76 | A_84_P304940 | -3.38 | AT1G43330 | myb family protein-like protein                                           |
| 77 | A_84_P804310 | -2.22 | AT1G43800 | stearoyl-acyl-carrier protein desaturase-like protein                     |
| 78 | A_84_P13367  | -2.00 | AT1G48660 | auxin-responsive GH3-like protein                                         |
| 79 | A_84_P22781  | -2.96 | AT1G49390 | 2-oxoglutarate (2OG) and Fe(II)-dependent oxygenase-like protein          |
| 80 | A_84_P752771 | -3.56 | AT1G49715 | defensin-like protein 175                                                 |
| 81 | A_84_P23487  | -3.08 | AT1G49860 | glutathione S-transferase (class phi) 14 (GSTF14)                         |
| 82 | A_84_P838510 | -2.26 | AT1G50140 | P-loop containing NTPase domain-containing protein                        |
| 83 | A_84_P753871 | -2.51 | AT1G50325 | plant invertase/pectin methylesterase inhibitor domain-containing protein |
| 84 | A_84_P150938 | -2.15 | AT1G51055 | FBD-like domain family protein                                            |
| 85 | A_84_P18915  | -2.48 | AT1G51460 | ABC transporter G family member 13                                        |
| 86 | A_84_P787018 | -2.89 | AT1G51670 | hypothetical protein                                                      |
| 87 | A_84_P10415  | -2.58 | AT1G52030 | myrosinase-binding protein 2 (MBP2)                                       |
| 88 | A_84_P11360  | -2.48 | AT1G52040 | myrosinase-binding protein 1 (MBP1)                                       |
| 89 | A_84_P868891 | -3.38 | AT1G52400 | beta glucosidase 18 (BGLU18)                                              |
| 90 | A_84_P24006  | -2.50 | AT1G53010 | putative RING-H2 finger protein ATL19                                     |
| 91 | A_84_P22112  | -2.74 | AT1G53070 | legume lectin-like protein                                                |
| 92 | A_84_P208818 | -2.13 | AT1G53180 | hypothetical protein                                                      |
| 93 | A_84_P519677 | -2.48 | AT1G53860 | remorin-like protein                                                      |
| 94 | A_84_P223359 | -4.73 | AT1G54000 | GDSL esterase/lipase                                                      |
| 95 | A_84_P15194  | -2.47 | AT1G54020 | GDSL esterase/lipase                                                      |
| 96 | A_84_P563999 | -2.29 | AT1G54930 | GRF zinc finger / Zinc knuckle protein                                    |
| 97 | A_84_P16982  | -3.54 | AT1G55010 | defensin-like protein 18 (PDF1.5)                                         |

|     |              |       |           |                                                                                    |
|-----|--------------|-------|-----------|------------------------------------------------------------------------------------|
| 98  | A_84_P19680  | -2.54 | AT1G55940 | cytochrome P450, family 708, subfamily A, polypeptide 1 (CYP708A1)                 |
| 99  | A_84_P20991  | -2.05 | AT1G57650 | ATP binding protein                                                                |
| 100 | A_84_P235603 | -2.57 | AT1G58190 | receptor like protein 9 (RLP9)                                                     |
| 101 | A_84_P17213  | -2.54 | AT1G58410 | putative disease resistance protein RXW24L                                         |
| 102 | A_84_P23712  | -2.30 | AT1G59860 | HSP20-like chaperone                                                               |
| 103 | A_84_P206348 | -2.67 | AT1G60060 | serine/threonine-protein kinase WNK (With No lysine)-related protein               |
| 104 | A_84_P753079 | -2.52 | AT1G60815 | RALF-like 7 protein (RALFL7)                                                       |
| 105 | A_84_P555153 | -4.06 | AT1G60985 | defensin-like protein 247 (SCRL6)                                                  |
| 106 | A_84_P595204 | -2.32 | AT1G61090 | hypothetical protein                                                               |
| 107 | A_84_P551607 | -3.86 | AT1G61810 | beta-glucosidase 45 (BGLU45)                                                       |
| 108 | A_84_P853675 | -2.15 | AT1G61820 | beta glucosidase 46 (BGLU46)                                                       |
| 109 | A_84_P19094  | -5.71 | AT1G62360 | homeobox protein SHOOT MERISTEMLESS (STM)                                          |
| 110 | A_84_P11357  | -3.00 | AT1G62500 | bifunctional inhibitor/lipid-transfer protein/seed storage 2S albumin-like protein |
| 111 | A_84_P596994 | -2.92 | AT1G62610 | rossmann-fold NAD(P)-binding domain-containing protein                             |
| 112 | A_84_P14874  | -2.27 | AT1G62770 | plant invertase/pectin methylesterase inhibitor domain-containing protein          |
| 113 | A_84_P21276  | -4.07 | AT1G62980 | expansin A18 (EXPA18)                                                              |
| 114 | A_84_P525908 | -2.52 | AT1G63055 | hypothetical protein                                                               |
| 115 | A_84_P588958 | -2.62 | AT1G63630 | pentatricopeptide (PPR) repeat-containing protein                                  |
| 116 | A_84_P218238 | -2.94 | AT1G65450 | HXXXD-type acyl-transferase-like protein                                           |
| 117 | A_84_P827875 | -3.02 | AT1G65880 | benzoyloxyglucosinolate 1 (BZO1)                                                   |
| 118 | A_84_P10495  | -2.59 | AT1G65890 | acyl activating enzyme 12 (AAE12)                                                  |
| 119 | A_84_P96746  | -2.23 | AT1G66045 | hypothetical protein                                                               |
| 120 | A_84_P15425  | -2.09 | AT1G67750 | putative pectate lyase 5                                                           |
| 121 | A_84_P17020  | -2.69 | AT1G67760 | TCP-1/cpn60 chaperonin family protein                                              |
| 122 | A_84_P274410 | -3.00 | AT1G68330 | hypothetical protein                                                               |

|     |              |       |           |                                                                    |
|-----|--------------|-------|-----------|--------------------------------------------------------------------|
| 123 | A_84_P17766  | -3.45 | AT1G68640 | transcription factor perIANTHIA (PAN)                              |
| 124 | A_84_P11481  | -3.17 | AT1G68850 | peroxidase 11                                                      |
| 125 | A_84_P839208 | -2.24 | AT1G70260 | nodulin MtN21 /EamA-like transporter protein                       |
| 126 | A_84_P18075  | -4.77 | AT1G70510 | homeobox protein knotted-1-like 2 (KNAT2)                          |
| 127 | A_84_P808187 | -2.54 | AT1G70850 | MLP-like protein 34 (MLP34)                                        |
| 128 | A_84_P20786  | -2.75 | AT1G71692 | agamous-like MADS-box protein (AGL12)                              |
| 129 | A_84_P553411 | -2.58 | AT1G71870 | protein novel ion carrier-2                                        |
| 130 | A_84_P704762 | -2.72 | AT1G72131 | pseudogene of proton-dependent oligopeptide transporter            |
| 131 | A_84_P21584  | -2.61 | AT1G72210 | transcription factor bHLH96                                        |
| 132 | A_84_P22839  | -3.07 | AT1G73260 | kunitz trypsin inhibitor 1 (KTI1)                                  |
| 133 | A_84_P856876 | -3.91 | AT1G73330 | drought-repressed 4 protein (DR4)                                  |
| 134 | A_84_P20631  | -2.31 | AT1G73580 | C2 domain-containing protein                                       |
| 135 | A_84_P11463  | -3.31 | AT1G73620 | pathogenesis-related thaumatin-like protein                        |
| 136 | A_84_P536610 | -2.36 | AT1G73850 | hypothetical protein                                               |
| 137 | A_84_P107472 | -2.07 | AT1G73880 | UDP-glucosyl transferase 89B1 (UGT89B1)                            |
| 138 | A_84_P16209  | -2.04 | AT1G74110 | cytochrome P450, family 78, subfamily A, polypeptide 10 (CYP78A10) |
| 139 | A_84_P18470  | -4.06 | AT1G74140 | rhomboid-related intramembrane serine protease family protein      |
| 140 | A_84_P12431  | -2.65 | AT1G74420 | fucosyltransferase 3 (FUT3)                                        |
| 141 | A_84_P15266  | -2.36 | AT1G74460 | GDSL esterase/lipase                                               |
| 142 | A_84_P750006 | -3.45 | AT1G75250 | RAD-like 6 protein (RL6)                                           |
| 143 | A_84_P10530  | -2.31 | AT1G75780 | tubulin beta (TUB1)                                                |
| 144 | A_84_P17176  | -2.62 | AT1G75920 | GDSL esterase/lipase EXL5                                          |
| 145 | A_84_P23757  | -2.18 | AT1G76420 | protein CUP-SHAPED COTYLEDON 3 (CUC3)                              |
| 146 | A_84_P610382 | -2.20 | AT1G78430 | ROP interactive partner 2 (RIP2)                                   |
| 147 | A_84_P19093  | -2.01 | AT1G78490 | cytochrome P450, family 708, subfamily A, polypeptide 3 (CYP708A3) |

|     |              |       |           |                                                            |
|-----|--------------|-------|-----------|------------------------------------------------------------|
| 148 | A_84_P532174 | -3.06 | AT1G78815 | hypothetical protein (LSH7)                                |
| 149 | A_84_P18076  | -2.18 | AT1G80340 | gibberellin 3-beta-dioxygenase 2 (GA3OX2)                  |
| 150 | A_84_P22056  | -2.00 | AT2G01770 | vacuolar iron transporter 1 (VIT1)                         |
| 151 | A_84_P737916 | -2.75 | AT2G01818 | PLATZ transcription factor family protein                  |
| 152 | A_84_P88649  | -2.12 | AT2G02850 | plantacyanin (ARPN)                                        |
| 153 | A_84_P756328 | -4.04 | AT2G03920 | hypothetical protein                                       |
| 154 | A_84_P516247 | -4.14 | AT2G04480 | hypothetical protein                                       |
| 155 | A_84_P611298 | -2.56 | AT2G04515 | hypothetical protein                                       |
| 156 | A_84_P758645 | -3.15 | AT2G04622 | hypothetical protein                                       |
| 157 | A_84_P75644  | -6.01 | AT2G05440 | glycine-rich protein 9 (GRP9)                              |
| 158 | A_84_P843585 | -2.56 | AT2G06980 | hypothetical protein                                       |
| 159 | A_84_P601261 | -2.37 | AT2G07140 | F-box and associated interaction domain-containing protein |
| 160 | A_84_P18281  | -2.07 | AT2G07330 | mutator-like transposase family protein                    |
| 161 | A_84_P756180 | -2.44 | AT2G14890 | arabinogalactan protein 9 (AGP9)                           |
| 162 | A_84_P755788 | -2.12 | AT2G15940 | hAT-like transposase family protein                        |
| 163 | A_84_P157745 | -2.55 | AT2G16365 | F-box protein                                              |
| 164 | A_84_P10668  | -2.11 | AT2G16580 | SAUR-like auxin-responsive protein                         |
| 165 | A_84_P755941 | -2.12 | AT2G16905 | similar to putative MATE efflux membrane protein           |
| 166 | A_84_P800917 | -2.00 | AT2G17230 | protein exordium like 5 (EXL5)                             |
| 167 | A_84_P612207 | -2.43 | AT2G18196 | heavy-metal-associated domain-containing protein           |
| 168 | A_84_P235483 | -3.74 | AT2G18360 | esterase/lipase domain-containing protein                  |
| 169 | A_84_P19149  | -2.61 | AT2G18370 | non-specific lipid-transfer protein 8                      |
| 170 | A_84_P18265  | -2.84 | AT2G18480 | putative polyol transporter 3                              |
| 171 | A_84_P269540 | -3.06 | AT2G18500 | ovate family protein 7 (OFP7)                              |
| 172 | A_84_P834894 | -2.59 | AT2G18550 | homeobox-leucine zipper protein ATHB-21 (HB21)             |

|     |              |       |           |                                                                   |
|-----|--------------|-------|-----------|-------------------------------------------------------------------|
| 173 | A_84_P565889 | -2.94 | AT2G19910 | RNA-dependent RNA polymerase-like protein                         |
| 174 | A_84_P559688 | -2.94 | AT2G19920 | RNA-dependent RNA polymerase family protein                       |
| 175 | A_84_P18172  | -4.00 | AT2G19970 | putative pathogenesis-related protein                             |
| 176 | A_84_P757414 | -4.14 | AT2G20208 | defensin-like protein 172 (LCR60)                                 |
| 177 | A_84_P520692 | -2.16 | AT2G20970 | putative lipid binding protein                                    |
| 178 | A_84_P107712 | -2.47 | AT2G21100 | disease resistance-responsive, dirigent domain-containing protein |
| 179 | A_84_P757218 | -2.12 | AT2G21465 | defensin-like protein 291                                         |
| 180 | A_84_P19215  | -2.62 | AT2G21510 | DNAJ heat shock N-terminal domain-containing protein              |
| 181 | A_84_P288260 | -3.01 | AT2G21730 | cinnamyl alcohol dehydrogenase 2 (CAD2)                           |
| 182 | A_84_P275560 | -2.34 | AT2G21800 | essential meiotic endonuclease 1A (EME1A)                         |
| 183 | A_84_P551717 | -2.25 | AT2G21980 | hypothetical protein                                              |
| 184 | A_84_P20138  | -2.72 | AT2G23060 | acyl-CoA N-acyltransferases-like protein                          |
| 185 | A_84_P15349  | -2.77 | AT2G24010 | carboxypeptidase D (SCPL23)                                       |
| 186 | A_84_P188374 | -2.19 | AT2G24650 | transcriptional factor B3 family protein                          |
| 187 | A_84_P560603 | -2.45 | AT2G24700 | B3 domain-containing protein REM10                                |
| 188 | A_84_P596218 | -2.75 | AT2G25130 | armadillo/beta-catenin-like repeats-containing protein            |
| 189 | A_84_P600681 | -4.99 | AT2G27320 | hypothetical protein                                              |
| 190 | A_84_P570378 | -2.50 | AT2G28690 | hypothetical protein                                              |
| 191 | A_84_P297814 | -3.44 | AT2G28780 | hypothetical protein                                              |
| 192 | A_84_P22017  | -2.88 | AT2G28790 | pathogenesis-related thaumatin-like protein                       |
| 193 | A_84_P557066 | -3.10 | AT2G29125 | ROTUNDIFOLIA like 2 (RTFL2)                                       |
| 194 | A_84_P21064  | -2.72 | AT2G29220 | concanavalin A-like lectin protein kinase-like protein            |
| 195 | A_84_P11606  | -3.10 | AT2G29480 | glutathione S-transferase (GSTU2)                                 |
| 196 | A_84_P10660  | -2.26 | AT2G29490 | glutathione S-transferase (GSTU1)                                 |
| 197 | A_84_P12504  | -2.04 | AT2G29750 | UDP-glucosyl transferase 71C1 (UGT71C1)                           |

|     |              |       |           |                                                                                        |
|-----|--------------|-------|-----------|----------------------------------------------------------------------------------------|
| 198 | A_84_P15345  | -3.67 | AT2G30210 | laccase 3 (LAC3)                                                                       |
| 199 | A_84_P312043 | -2.92 | AT2G31220 | transcription factor bHLH10                                                            |
| 200 | A_84_P10376  | -2.72 | AT2G31955 | molybdopterin biosynthesis protein (CNX2)                                              |
| 201 | A_84_P824811 | -2.24 | AT2G32870 | TRAF-like family protein                                                               |
| 202 | A_84_P21973  | -3.91 | AT2G33260 | tryptophan/tyrosine permease                                                           |
| 203 | A_84_P526051 | -2.67 | AT2G33775 | ralf-like 19 protein (RALFL19)                                                         |
| 204 | A_84_P565043 | -2.17 | AT2G33845 | OB-fold nucleic acid binding domain-containing protein                                 |
| 205 | A_84_P284670 | -2.54 | AT2G33850 | hypothetical protein                                                                   |
| 206 | A_84_P15394  | -3.55 | AT2G34830 | putative WRKY transcription factor 35 (WRKY35)                                         |
| 207 | A_84_P758119 | -3.80 | AT2G35208 | hypothetical protein                                                                   |
| 208 | A_84_P21018  | -2.04 | AT2G35580 | serine protease inhibitor-like protein                                                 |
| 209 | A_84_P19195  | -2.23 | AT2G36570 | leucine-rich repeat protein kinase-like protein                                        |
| 210 | A_84_P515434 | -3.50 | AT2G36940 | hypothetical protein                                                                   |
| 211 | A_84_P577535 | -2.43 | AT2G36985 | DVL family protein (ROT4)                                                              |
| 212 | A_84_P832442 | -2.70 | AT2G37520 | acyl-CoA acyltransferase with RING/FYVE/PHD-type zinc finger domain-containing protein |
| 213 | A_84_P108532 | -2.03 | AT2G37880 | hypothetical protein                                                                   |
| 214 | A_84_P21101  | -5.45 | AT2G38100 | proton-dependent oligopeptide transport-like protein                                   |
| 215 | A_84_P584689 | -2.14 | AT2G38160 | hypothetical protein                                                                   |
| 216 | A_84_P22055  | -5.36 | AT2G38380 | peroxidase 22                                                                          |
| 217 | A_84_P807916 | -2.69 | AT2G38390 | peroxidase 23                                                                          |
| 218 | A_84_P21047  | -2.49 | AT2G38530 | non-specific lipid-transfer protein 2 (LTP2)                                           |
| 219 | A_84_P817628 | -2.51 | AT2G39330 | myrosinase-binding protein-like protein (JAL23)                                        |
| 220 | A_84_P14494  | -2.64 | AT2G39430 | disease resistance-responsive (dirigent-like protein) family protein                   |
| 221 | A_84_P20167  | -2.90 | AT2G39510 | nodulin MtN21-like protein                                                             |
| 222 | A_84_P10642  | -2.24 | AT2G39850 | subtilisin-like serine protease                                                        |



|     |              |       |           |                                                     |
|-----|--------------|-------|-----------|-----------------------------------------------------|
| 223 | A_84_P591826 | -4.45 | AT2G40440 | BTB/POZ domain-containing protein                   |
| 224 | A_84_P178774 | -3.81 | AT2G41240 | transcription factor bHLH100 (BHLH100)              |
| 225 | A_84_P160753 | -4.00 | AT2G41800 | hypothetical protein                                |
| 226 | A_84_P23852  | -2.11 | AT2G42540 | cold-regulated protein 15a (COR15A)                 |
| 227 | A_84_P102416 | -3.10 | AT2G42610 | hypothetical protein (LSH10)                        |
| 228 | A_84_P248025 | -2.46 | AT2G42800 | receptor like protein 29 (RLP29)                    |
| 229 | A_84_P843757 | -3.41 | AT2G43660 | carbohydrate-binding X8 domain-containing protein   |
| 230 | A_84_P843750 | -2.25 | AT2G43670 | carbohydrate-binding X8 domain-containing protein   |
| 231 | A_84_P10606  | -2.08 | AT2G43830 | NPK1-related protein kinase 3                       |
| 232 | A_84_P22966  | -2.37 | AT2G44480 | beta glucosidase 17 (BGLU17)                        |
| 233 | A_84_P175924 | -2.23 | AT2G44745 | putative WRKY transcription factor 12               |
| 234 | A_84_P17343  | -2.28 | AT2G44840 | ethylene-responsive transcription factor 13 (ERF13) |
| 235 | A_84_P17298  | -2.13 | AT2G45080 | cyclin-U2-1                                         |
| 236 | A_84_P157385 | -2.17 | AT2G45410 | LOB domain-containing protein 19 (LBD19)            |
| 237 | A_84_P788026 | -2.41 | AT2G45480 | growth-regulating factor 9 (GRF9)                   |
| 238 | A_84_P258460 | -2.68 | AT2G47560 | RING-H2 finger protein ATL64                        |
| 239 | A_84_P551808 | -6.92 | AT3G01345 | hypothetical protein                                |
| 240 | A_84_P798714 | -2.27 | AT3G01930 | major facilitator protein                           |
| 241 | A_84_P540304 | -4.74 | AT3G02500 | hypothetical protein                                |
| 242 | A_84_P168853 | -3.53 | AT3G02550 | LOB domain-containing protein 41 (LBD41)            |
| 243 | A_84_P14553  | -2.01 | AT3G02610 | acyl-[acyl-carrier-protein] desaturase              |
| 244 | A_84_P607864 | -2.77 | AT3G02885 | GAST1 protein homolog 5 (GASA5)                     |
| 245 | A_84_P78785  | -2.62 | AT3G03650 | exostosin-like protein (EDA5)                       |
| 246 | A_84_P14515  | -5.00 | AT3G03910 | glutamate dehydrogenase (NAD(P)+) (GDH3)            |
| 247 | A_84_P511053 | -4.48 | AT3G04510 | hypothetical protein                                |

|     |              |       |           |                                                                   |
|-----|--------------|-------|-----------|-------------------------------------------------------------------|
| 248 | A_84_P554487 | -3.20 | AT3G04990 | hypothetical protein                                              |
| 249 | A_84_P761298 | -7.26 | AT3G05727 | defensin-like protein 204                                         |
| 250 | A_84_P562958 | -2.21 | AT3G06220 | AP2/B3 domain-containing protein                                  |
| 251 | A_84_P596321 | -2.25 | AT3G06435 | hypothetical protein                                              |
| 252 | A_84_P13606  | -4.36 | AT3G06560 | poly(A) polymerase 3 (PAPS3)                                      |
| 253 | A_84_P14537  | -2.03 | AT3G07260 | SMAD/FHA domain-containing protein                                |
| 254 | A_84_P523480 | -2.12 | AT3G07730 | hypothetical protein                                              |
| 255 | A_84_P571367 | -2.85 | AT3G08490 | hypothetical protein                                              |
| 256 | A_84_P12638  | -2.08 | AT3G08860 | pyrimidine 4 (PYD4)                                               |
| 257 | A_84_P13601  | -2.55 | AT3G09910 | RAB GTPase-like protein C2B                                       |
| 258 | A_84_P19274  | -3.96 | AT3G09930 | GDSL esterase/lipase                                              |
| 259 | A_84_P15477  | -3.97 | AT3G10000 | embryo sac development arrest 31 protein (EDA31)                  |
| 260 | A_84_P312153 | -2.37 | AT3G11430 | glycerol-3-phosphate acyltransferase 5 (GPAT5)                    |
| 261 | A_84_P505748 | -2.20 | AT3G11640 | hypothetical protein                                              |
| 262 | A_84_P811808 | -2.03 | AT3G12145 | polygalacturonase inhibitory protein-like protein (FLR1)          |
| 263 | A_84_P834809 | -2.27 | AT3G12220 | serine carboxypeptidase-like 16                                   |
| 264 | A_84_P20293  | -2.23 | AT3G12500 | chitinase                                                         |
| 265 | A_84_P788429 | -3.41 | AT3G12890 | protein activator of spomin::LUC2                                 |
| 266 | A_84_P17429  | -2.12 | AT3G13170 | meiotic recombination protein (SPO11-1)                           |
| 267 | A_84_P607017 | -3.34 | AT3G13175 | hypothetical protein                                              |
| 268 | A_84_P827406 | -2.17 | AT3G13227 | serine-rich protein-like protein                                  |
| 269 | A_84_P18365  | -2.77 | AT3G13270 | unknown protein                                                   |
| 270 | A_84_P19339  | -2.78 | AT3G13650 | disease resistance-responsive, dirigent domain-containing protein |
| 271 | A_84_P760333 | -2.52 | AT3G13855 | LOB domain-containing protein 22 (LBD22)                          |
| 272 | A_84_P225239 | -2.39 | AT3G13960 | growth-regulating factor 5 (GRF5)                                 |

|     |              |        |           |                                                                                    |
|-----|--------------|--------|-----------|------------------------------------------------------------------------------------|
| 273 | A_84_P173081 | -2.48  | AT3G14510 | geranylgeranyl diphosphate synthase, type II                                       |
| 274 | A_84_P22172  | -2.45  | AT3G15200 | pentatricopeptide repeat-containing protein                                        |
| 275 | A_84_P15504  | -2.26  | AT3G15990 | putative sulfate transporter 3.4                                                   |
| 276 | A_84_P520839 | -2.14  | AT3G16070 | hypothetical protein                                                               |
| 277 | A_84_P758863 | -4.24  | AT3G16390 | nitrile-specifier protein 3 (NSP3)                                                 |
| 278 | A_84_P500433 | -5.73  | AT3G16410 | nitrile-specifier protein 4 (NSP4)                                                 |
| 279 | A_84_P219878 | -2.20  | AT3G16450 | jacalin-like lectin domain-containing protein                                      |
| 280 | A_84_P17428  | -2.101 | AT3G16490 | protein IQ-domain 26                                                               |
| 281 | A_84_P531488 | -2.51  | AT3G16900 | LURP-one-related 13 protein                                                        |
| 282 | A_84_P187174 | -2.13  | AT3G17520 | late embryogenesis abundant domain-containing protein                              |
| 283 | A_84_P13635  | -2.86  | AT3G18400 | NAC domain containing protein 58 (NAC058)                                          |
| 284 | A_84_P762878 | -2.28  | AT3G18550 | transcription factor TCP18                                                         |
| 285 | A_84_P831705 | -3.86  | AT3G18900 | hypothetical protein                                                               |
| 286 | A_84_P18382  | -2.56  | AT3G19160 | adenylate isopentenyltransferase 8 (IPT8)                                          |
| 287 | A_84_P761070 | -2.05  | AT3G19184 | AP2/B3 domain-containing transcription factor                                      |
| 288 | A_84_P517322 | -3.15  | AT3G19200 | hypothetical protein                                                               |
| 289 | A_84_P784688 | -2.31  | AT3G19680 | hypothetical protein                                                               |
| 290 | A_84_P16489  | -2.57  | AT3G19700 | receptor-like protein kinase (IKU2)                                                |
| 291 | A_84_P10802  | -3.76  | AT3G20380 | TRAF-like family protein                                                           |
| 292 | A_84_P19301  | -2.54  | AT3G21770 | peroxidase 30                                                                      |
| 293 | A_84_P759230 | -2.93  | AT3G21933 | similar to receptor-like protein kinase homolog RK20-1                             |
| 294 | A_84_P17426  | -2.93  | AT3G22040 | cysteine-rich repeat secretory protein 34                                          |
| 295 | A_84_P838159 | -3.03  | AT3G22560 | GCN5-related N-acetyltransferase (GNAT) family protein                             |
| 296 | A_84_P50790  | -5.10  | AT3G22620 | bifunctional inhibitor/lipid-transfer protein/seed storage 2S albumin-like protein |
| 297 | A_84_P796248 | -2.11  | AT3G22790 | kinase interacting KIP1-like protein                                               |

|     |              |       |           |                                                        |
|-----|--------------|-------|-----------|--------------------------------------------------------|
| 298 | A_84_P21200  | -4.52 | AT3G23060 | putative E3 ubiquitin protein ligase DRIPH             |
| 299 | A_84_P777695 | -4.81 | AT3G23290 | hypothetical protein                                   |
| 300 | A_84_P560759 | -2.02 | AT3G23430 | phosphate transporter (PHO1)                           |
| 301 | A_84_P841353 | -2.34 | AT3G23955 | F-box family protein                                   |
| 302 | A_84_P20263  | -3.02 | AT3G24130 | putative pectinesterase 29                             |
| 303 | A_84_P11760  | -2.25 | AT3G24340 | chromatin remodeling 40                                |
| 304 | A_84_P800077 | -2.87 | AT3G24517 | hypothetical protein                                   |
| 305 | A_84_P785389 | -3.10 | AT3G24650 | B3 domain-containing transcription factor (ABI3)       |
| 306 | A_84_P15115  | -3.24 | AT3G24982 | receptor like protein 40 (RLP40)                       |
| 307 | A_84_P12686  | -2.63 | AT3G25180 | cytochrome P450, family 82, subfamily G, polypeptide 1 |
| 308 | A_84_P13631  | -3.49 | AT3G25190 | vacuolar iron transporter-like protein                 |
| 309 | A_84_P18388  | -3.29 | AT3G26330 | cytochrome P450 71B37 (CYP71B37)                       |
| 310 | A_84_P568745 | -2.23 | AT3G27250 | hypothetical protein                                   |
| 311 | A_84_P277340 | -4.10 | AT3G27650 | LOB domain-containing protein 25 (LBD25)               |
| 312 | A_84_P22129  | -4.61 | AT3G27660 | oleosin 4                                              |
| 313 | A_84_P10810  | -4.50 | AT3G27920 | trichome differentiation protein GL1                   |
| 314 | A_84_P549255 | -2.24 | AT3G28600 | AAA-type ATPase family protein                         |
| 315 | A_84_P24073  | -3.47 | AT3G28740 | cytochrome P450 (CYP81D11)                             |
| 316 | A_84_P502242 | -2.61 | AT3G28770 | hypothetical protein                                   |
| 317 | A_84_P11776  | -2.53 | AT3G29410 | terpene cyclase class C1 domain-containing protein     |
| 318 | A_84_P13657  | -4.96 | AT3G29590 | HXXXD-type acyl-transferase-like protein               |
| 319 | A_84_P759810 | -2.06 | AT3G29727 | non-LTR retrotransposon family protein                 |
| 320 | A_84_P521787 | -3.91 | AT3G30340 | nodulin MtN21 /EamA-like transporter family protein    |
| 321 | A_84_P10779  | -2.23 | AT3G30530 | basic leucine-zipper 42 (bZIP42)                       |
| 322 | A_84_P759907 | -2.57 | AT3G32445 | putative ribonucleotide reductase                      |

|     |              |       |           |                                                         |
|-----|--------------|-------|-----------|---------------------------------------------------------|
| 323 | A_84_P807217 | -2.53 | AT3G32980 | peroxidase 32                                           |
| 324 | A_84_P762117 | -3.65 | AT3G42385 | hypothetical protein                                    |
| 325 | A_84_P828509 | -3.40 | AT3G43190 | sucrose synthase 4 (SUS4)                               |
| 326 | A_84_P762161 | -2.56 | AT3G43291 | hypothetical protein                                    |
| 327 | A_84_P198514 | -2.09 | AT3G43715 | hypothetical protein                                    |
| 328 | A_84_P518239 | -3.79 | AT3G43990 | bromo-adjacent homology (BAH) domain-containing protein |
| 329 | A_84_P761512 | -2.09 | AT3G44212 | maternally expressed gene (MEG) family protein          |
| 330 | A_84_P245685 | -2.60 | AT3G44300 | nitrilase 2 (NIT2)                                      |
| 331 | A_84_P19356  | -2.87 | AT3G44540 | putative fatty acyl-CoA reductase 4 (FAR4)              |
| 332 | A_84_P740321 | -2.95 | AT3G44550 | putative fatty acyl-CoA reductase 5 (FAR5)              |
| 333 | A_84_P11794  | -2.38 | AT3G45080 | sulfotransferase family protein                         |
| 334 | A_84_P286710 | -2.10 | AT3G45160 | putative membrane lipoprotein                           |
| 335 | A_84_P759856 | -2.08 | AT3G45460 | IBR domain containing protein                           |
| 336 | A_84_P22199  | -2.18 | AT3G45940 | alpha-glucosidase                                       |
| 337 | A_84_P838660 | -2.44 | AT3G47740 | ABC transporter A family member 3                       |
| 338 | A_84_P21263  | -4.08 | AT3G48010 | cyclic nucleotide gated channel (CNGC16)                |
| 339 | A_84_P205218 | -2.38 | AT3G48340 | putative cysteine proteinase                            |
| 340 | A_84_P840181 | -2.10 | AT3G48450 | RPM1-interacting protein 4 (RIN4)                       |
| 341 | A_84_P583050 | -2.69 | AT3G48630 | unknown protein                                         |
| 342 | A_84_P521810 | -2.25 | AT3G48810 | pentatricopeptide repeat-containing protein             |
| 343 | A_84_P20320  | -2.13 | AT3G48920 | myb domain protein 45 (MYB45)                           |
| 344 | A_84_P19375  | -6.65 | AT3G49110 | peroxidase 33                                           |
| 345 | A_84_P15594  | -3.76 | AT3G49700 | 1-aminocyclopropane-1-carboxylate synthase 9 (ACS9)     |
| 346 | A_84_P14650  | -2.08 | AT3G49960 | peroxidase 35                                           |
| 347 | A_84_P21272  | -2.38 | AT3G50230 | leucine-rich repeat protein kinase-like protein         |

|     |              |        |           |                                                                                    |
|-----|--------------|--------|-----------|------------------------------------------------------------------------------------|
| 348 | A_84_P760516 | -4.80  | AT3G50290 | HXXXD-type acyl-transferase family protein                                         |
| 349 | A_84_P22221  | -2.27  | AT3G50940 | cytochrome BC1 synthesis-like protein                                              |
| 350 | A_84_P845665 | -4.13  | AT3G51350 | aspartyl protease family protein                                                   |
| 351 | A_84_P18443  | -2.10  | AT3G52440 | dof zinc finger protein DOF3.5                                                     |
| 352 | A_84_P591086 | -2.53  | AT3G52550 | hypothetical protein                                                               |
| 353 | A_84_P22228  | -2.10  | AT3G52700 | hypothetical protein                                                               |
| 354 | A_84_P19393  | -2.37  | AT3G53200 | myb domain protein 27 (MYB27)                                                      |
| 355 | A_84_P16557  | -2.14  | AT3G53510 | ABC transporter G family member 20                                                 |
| 356 | A_84_P607989 | -2.00  | AT3G54550 | hypothetical protein                                                               |
| 357 | A_84_P21292  | -14.56 | AT3G54660 | glutathione reductase (GR2)                                                        |
| 358 | A_84_P19403  | -2.47  | AT3G55230 | disease resistance-responsive, dirigent domain-containing protein                  |
| 359 | A_84_P760611 | -2.48  | AT3G55300 | copia-like retrotransposon family protein                                          |
| 360 | A_84_P761387 | -3.15  | AT3G55515 | protein rotundifolia like 7                                                        |
| 361 | A_84_P295824 | -5.10  | AT3G56970 | transcription factor ORG2                                                          |
| 362 | A_84_P57900  | -3.62  | AT3G56980 | transcription factor ORG3                                                          |
| 363 | A_84_P23195  | -3.40  | AT3G57130 | ankyrin repeat and BTB/POZ domain-containing protein (BOP1)                        |
| 364 | A_84_P525365 | -3.30  | AT3G57500 | hypothetical protein                                                               |
| 365 | A_84_P570603 | -2.48  | AT3G58370 | TRAF-like family protein                                                           |
| 366 | A_84_P295514 | -2.10  | AT3G58550 | bifunctional inhibitor/lipid-transfer protein/seed storage 2S albumin-like protein |
| 367 | A_84_P538694 | -2.89  | AT3G58770 | hypothetical protein                                                               |
| 368 | A_84_P12803  | -2.02  | AT3G59730 | concanavalin A-like lectin kinase-like protein                                     |
| 369 | A_84_P790736 | -3.59  | AT3G60670 | PLATZ transcription factor family protein                                          |
| 370 | A_84_P591116 | -5.11  | AT3G60890 | protein little zipper 2 (ZPR2)                                                     |
| 371 | A_84_P24156  | -3.07  | AT3G60900 | fasciclin-like arabinogalactan protein 10                                          |
| 372 | A_84_P21323  | -4.21  | AT3G62170 | pectinesterase (VGDH2)                                                             |

|     |              |       |           |                                                      |
|-----|--------------|-------|-----------|------------------------------------------------------|
| 373 | A_84_P137289 | -2.40 | AT3G62230 | F-box protein                                        |
| 374 | A_84_P24163  | -3.45 | AT3G62730 | hypothetical protein                                 |
| 375 | A_84_P18490  | -2.42 | AT3G63280 | serine/threonine-protein kinase (NEK4)               |
| 376 | A_84_P587560 | -2.60 | AT4G00416 | methyl-CPG-binding domain 3 protein (MBD3)           |
| 377 | A_84_P281390 | -2.67 | AT4G01140 | hypothetical protein                                 |
| 378 | A_84_P10935  | -2.74 | AT4G01380 | plastocyanin-like domain-containing protein          |
| 379 | A_84_P592920 | -2.43 | AT4G01390 | TRAF-like family protein                             |
| 380 | A_84_P542240 | -4.04 | AT4G01525 | sadhu non-coding retrotransposon family protein      |
| 381 | A_84_P763949 | -2.88 | AT4G01595 | protein kinase-like protein                          |
| 382 | A_84_P847684 | -4.03 | AT4G02290 | endoglucanase 17                                     |
| 383 | A_84_P14722  | -2.59 | AT4G02700 | sulfate transporter 3.2                              |
| 384 | A_84_P586693 | -2.97 | AT4G03590 | cystatin-related domain-containing protein           |
| 385 | A_84_P14725  | -4.98 | AT4G03610 | metallo-hydrolase/oxidoreductase superfamily protein |
| 386 | A_84_P763002 | -2.25 | AT4G03816 | copla-like retrotransposon family protein            |
| 387 | A_84_P838983 | -2.66 | AT4G03830 | hypothetical protein                                 |
| 388 | A_84_P763953 | -2.04 | AT4G04100 | CACTA-like transposase family protein                |
| 389 | A_84_P763895 | -2.32 | AT4G04405 | non-LTR retrotransposon family protein               |
| 390 | A_84_P172203 | -2.19 | AT4G04635 | unknown protein                                      |
| 391 | A_84_P16621  | -2.85 | AT4G05170 | basic helix-loop-helix domain-containing protein     |
| 392 | A_84_P763524 | -3.44 | AT4G06493 | similar to putative reverse transcriptase            |
| 393 | A_84_P763212 | -2.40 | AT4G06614 | similar to putative transposase                      |
| 394 | A_84_P764250 | -2.66 | AT4G06652 | CACTA-like transposase family protein                |
| 395 | A_84_P763409 | -3.44 | AT4G07454 | gypsy-like retrotransposon family protein            |
| 396 | A_84_P763662 | -3.84 | AT4G07738 | gypsy-like retrotransposon family protein            |
| 397 | A_84_P765811 | -2.61 | AT4G07812 | unknown protein                                      |

|     |              |       |           |                                                                                    |
|-----|--------------|-------|-----------|------------------------------------------------------------------------------------|
| 398 | A_84_P22299  | -3.15 | AT4G07960 | putative xyloglucan glycosyltransferase 12 (CSLC12)                                |
| 399 | A_84_P802670 | -2.08 | AT4G08150 | homeobox protein knotted-1-like 1 (KNAT1)                                          |
| 400 | A_84_P106116 | -2.34 | AT4G08680 | mutator-like transposase family protein                                            |
| 401 | A_84_P82119  | -3.09 | AT4G08895 | inorganic phosphate transporter family protein                                     |
| 402 | A_84_P811890 | -2.19 | AT4G08950 | phosphate-responsive 1 family protein                                              |
| 403 | A_84_P10013  | -2.51 | AT4G09940 | AIG1-like protein                                                                  |
| 404 | A_84_P14740  | -2.19 | AT4G10240 | B-box type zinc finger-containing protein                                          |
| 405 | A_84_P17578  | -2.85 | AT4G10270 | putative wound-responsive protein                                                  |
| 406 | A_84_P10964  | -4.38 | AT4G11190 | disease resistance-responsive, dirigent domain-containing protein                  |
| 407 | A_84_P18528  | -5.59 | AT4G11290 | peroxidase 39                                                                      |
| 408 | A_84_P20420  | -2.47 | AT4G11320 | putative cysteine proteinase                                                       |
| 409 | A_84_P23259  | -3.98 | AT4G11580 | putative F-box protein                                                             |
| 410 | A_84_P812535 | -3.00 | AT4G11650 | osmotin-like protein (OSM34)                                                       |
| 411 | A_84_P592948 | -2.29 | AT4G11911 | hypothetical protein                                                               |
| 412 | A_84_P580438 | -2.29 | AT4G11930 | hypothetical protein                                                               |
| 413 | A_84_P528968 | -2.97 | AT4G12450 | hypothetical protein                                                               |
| 414 | A_84_P11916  | -3.38 | AT4G12870 | gamma interferon responsive lysosomal thiol (GILT) reductase family protein        |
| 415 | A_84_P13806  | -2.36 | AT4G12890 | gamma interferon responsive lysosomal thiol (GILT) reductase family protein        |
| 416 | A_84_P23265  | -2.19 | AT4G13090 | xyloglucan endotransglucosylase/hydrolase protein 2 (XTH2)                         |
| 417 | A_84_P764224 | -3.61 | AT4G13261 | hypothetical protein                                                               |
| 418 | A_84_P548483 | -2.18 | AT4G14250 | structural constituent of ribosome                                                 |
| 419 | A_84_P298854 | -5.44 | AT4G14465 | AT-hook motif nuclear-localized protein 20 (AHL20)                                 |
| 420 | A_84_P835822 | -2.11 | AT4G14590 | integrator complex subunit 3                                                       |
| 421 | A_84_P800959 | -3.51 | AT4G15160 | bifunctional inhibitor/lipid-transfer protein/seed storage 2S albumin-like protein |
| 422 | A_84_P567982 | -2.58 | AT4G15210 | beta-amylase 5                                                                     |



|     |              |       |           |                                                                                    |
|-----|--------------|-------|-----------|------------------------------------------------------------------------------------|
| 423 | A_84_P609850 | -2.18 | AT4G16550 | HSP20-like chaperone                                                               |
| 424 | A_84_P174401 | -2.39 | AT4G16820 | lipase class 3 family protein                                                      |
| 425 | A_84_P155385 | -3.73 | AT4G17280 | putative auxin-responsive protein                                                  |
| 426 | A_84_P183974 | -3.22 | AT4G17480 | palmitoyl protein thioesterase family protein                                      |
| 427 | A_84_P765645 | -2.08 | AT4G17914 | ubiquitin-specific protease                                                        |
| 428 | A_84_P10980  | -2.14 | AT4G19000 | transcription elongation factor (TFIIS) family protein                             |
| 429 | A_84_P260800 | -3.62 | AT4G19430 | hypothetical protein                                                               |
| 430 | A_84_P21386  | -4.19 | AT4G20230 | terpene cyclase, C1 domain-containing protein                                      |
| 431 | A_84_P763975 | -2.01 | AT4G20240 | cytochrome P450, family 71, subfamily A, polypeptide 27 (CYP71A27)                 |
| 432 | A_84_P518362 | -4.07 | AT4G20290 | hypothetical protein                                                               |
| 433 | A_84_P847533 | -2.82 | AT4G20970 | basic helix-loop-helix domain-containing protein                                   |
| 434 | A_84_P10042  | -2.49 | AT4G21020 | late embryogenesis abundant domain-containing protein                              |
| 435 | A_84_P21392  | -2.01 | AT4G21650 | subtilase family protein                                                           |
| 436 | A_84_P13826  | -3.28 | AT4G21760 | beta-glucosidase 47                                                                |
| 437 | A_84_P763342 | -3.86 | AT4G22185 | hypothetical protein                                                               |
| 438 | A_84_P555590 | -2.54 | AT4G22212 | defensin-like protein 98                                                           |
| 439 | A_84_P607208 | -2.23 | AT4G22217 | defensin-like protein 100                                                          |
| 440 | A_84_P823257 | -2.29 | AT4G22235 | defensin-like protein 95                                                           |
| 441 | A_84_P764941 | -6.72 | AT4G22485 | bifunctional inhibitor/lipid-transfer protein/seed storage 2S albumin-like protein |
| 442 | A_84_P20449  | -6.24 | AT4G22490 | bifunctional inhibitor/lipid-transfer protein/seed storage 2S albumin-like protein |
| 443 | A_84_P764946 | -7.43 | AT4G22505 | bifunctional inhibitor/lipid-transfer protein/seed storage 2S albumin-like protein |
| 444 | A_84_P764933 | -6.81 | AT4G22513 | bifunctional inhibitor/lipid-transfer protein/seed storage 2S albumin-like protein |
| 445 | A_84_P764950 | -6.67 | AT4G22517 | bifunctional inhibitor/lipid-transfer protein/seed storage 2S albumin-like protein |
| 446 | A_84_P798916 | -2.10 | AT4G22520 | bifunctional inhibitor/lipid-transfer protein/seed storage 2S albumin-like protein |
| 447 | A_84_P516606 | -3.47 | AT4G22600 | hypothetical protein                                                               |

|     |              |       |           |                                                           |
|-----|--------------|-------|-----------|-----------------------------------------------------------|
| 448 | A_84_P197194 | -4.93 | AT4G22870 | leucoanthocyanidin dioxygenase                            |
| 449 | A_84_P12885  | -4.87 | AT4G22880 | leucoanthocyanidin dioxygenase (LDOX)                     |
| 450 | A_84_P822012 | -2.66 | AT4G24000 | cellulose synthase-like protein G2 (CSLG2)                |
| 451 | A_84_P765436 | -2.39 | AT4G24231 | hypothetical protein                                      |
| 452 | A_84_P20460  | -2.47 | AT4G25090 | putative respiratory burst oxidase-like protein protein G |
| 453 | A_84_P96816  | -3.61 | AT4G25760 | glutamine dumper 2 (GDU2)                                 |
| 454 | A_84_P12898  | -2.77 | AT4G25790 | allergen V5/Tpx-1-related family protein                  |
| 455 | A_84_P13844  | -2.35 | AT4G25980 | peroxidase 43                                             |
| 456 | A_84_P13845  | -4.61 | AT4G26170 | hypothetical protein                                      |
| 457 | A_84_P765054 | -2.11 | AT4G26255 | hypothetical protein                                      |
| 458 | A_84_P284290 | -3.53 | AT4G26380 | cysteine/histidine-rich C1 domain-containing protein      |
| 459 | A_84_P10392  | -2.40 | AT4G28560 | ROP-interactive CRIB motif-containing protein 7 (RIC7)    |
| 460 | A_84_P831659 | -2.64 | AT4G28680 | tyrosine decarboxylase (TYRDC)                            |
| 461 | A_84_P808742 | -2.92 | AT4G29030 | putative membrane lipoprotein                             |
| 462 | A_84_P161803 | -2.57 | AT4G29150 | protein IQ-domain 25                                      |
| 463 | A_84_P515742 | -4.07 | AT4G29280 | putative defensin-like protein 157                        |
| 464 | A_84_P824302 | -2.08 | AT4G29310 | hypothetical protein                                      |
| 465 | A_84_P16698  | -3.44 | AT4G29700 | alkaline-phosphatase-like protein                         |
| 466 | A_84_P548542 | -3.00 | AT4G30090 | protein embryo defective 1353                             |
| 467 | A_84_P14808  | -6.36 | AT4G30140 | GDSL esterase/lipase                                      |
| 468 | A_84_P17646  | -2.05 | AT4G30170 | peroxidase 45                                             |
| 469 | A_84_P21430  | -4.53 | AT4G30250 | AAA domain-containing protein                             |
| 470 | A_84_P119612 | -2.59 | AT4G31620 | B3 domain-containing protein REM3                         |
| 471 | A_84_P22386  | -3.20 | AT4G32540 | YUCCA family monooxygenase                                |
| 472 | A_84_P511310 | -2.24 | AT4G32785 | hypothetical protein                                      |

|     |              |       |           |                                                                    |
|-----|--------------|-------|-----------|--------------------------------------------------------------------|
| 473 | A_84_P592126 | -2.66 | AT4G32810 | carotenoid cleavage dioxygenase 8 (CCD8)                           |
| 474 | A_84_P22392  | -3.86 | AT4G34170 | putative F-box/kelch-repeat protein                                |
| 475 | A_84_P830495 | -2.48 | AT4G34400 | AP2/B3 domain-containing protein                                   |
| 476 | A_84_P11046  | -3.99 | AT4G34410 | ethylene-responsive transcription factor (ERF109)                  |
| 477 | A_84_P576971 | -3.11 | AT4G35810 | oxidoreductase, 2OG-Fe(II) oxygenase family protein                |
| 478 | A_84_P17671  | -2.78 | AT4G35900 | protein FD                                                         |
| 479 | A_84_P21483  | -3.12 | AT4G36590 | MADS-box transcription factor family protein                       |
| 480 | A_84_P235233 | -2.34 | AT4G36610 | hydrolase, alpha/beta fold family protein                          |
| 481 | A_84_P16754  | -2.22 | AT4G36740 | homeobox protein 40                                                |
| 482 | A_84_P23376  | -2.61 | AT4G36880 | cysteine proteinase1 (CP1)                                         |
| 483 | A_84_P505118 | -2.05 | AT4G37270 | myb domain protein 73                                              |
| 484 | A_84_P814616 | -3.26 | AT4G37410 | cytochrome P450, family 81, subfamily F, polypeptide 4 (CYP81F4)   |
| 485 | A_84_P524641 | -2.20 | AT4G39675 | hypothetical protein                                               |
| 486 | A_84_P542371 | -2.40 | AT5G01140 | hypothetical protein                                               |
| 487 | A_84_P17705  | -2.16 | AT5G01660 | hypothetical protein                                               |
| 488 | A_84_P17706  | -5.10 | AT5G01870 | non-specific lipid-transfer protein 10                             |
| 489 | A_84_P22437  | -2.81 | AT5G02140 | pathogenesis-related thaumatin-like protein                        |
| 490 | A_84_P537948 | -2.18 | AT5G03010 | kelch repeat-containing protein                                    |
| 491 | A_84_P18659  | -3.27 | AT5G03840 | protein TERMINAL FLOWER 1                                          |
| 492 | A_84_P512226 | -2.09 | AT5G04130 | DNA gyrase subunit B                                               |
| 493 | A_84_P20558  | -2.48 | AT5G06250 | AP2/B3 domain-containing protein                                   |
| 494 | A_84_P12995  | -2.91 | AT5G06940 | probably inactive leucine-rich repeat receptor-like protein kinase |
| 495 | A_84_P17723  | -2.07 | AT5G07030 | aspartyl protease family protein                                   |
| 496 | A_84_P102376 | -2.29 | AT5G08000 | glucan endo-1,3-beta-glucosidase-like protein 3                    |
| 497 | A_84_P14142  | -2.31 | AT5G09480 | hydroxyproline-rich glycoprotein family protein                    |

|     |              |       |           |                                                                |
|-----|--------------|-------|-----------|----------------------------------------------------------------|
| 498 | A_84_P13948  | -2.24 | AT5G09520 | hydroxyproline-rich glycoprotein family protein                |
| 499 | A_84_P861864 | -2.98 | AT5G09530 | hydroxyproline-rich glycoprotein family protein                |
| 500 | A_84_P580770 | -2.13 | AT5G09750 | transcription factor (HEC3)                                    |
| 501 | A_84_P570783 | -4.25 | AT5G10100 | haloacid dehalogenase-like hydrolase domain-containing protein |
| 502 | A_84_P200714 | -3.55 | AT5G10580 | hypothetical protein                                           |
| 503 | A_84_P13010  | -2.82 | AT5G11190 | ethylene-responsive transcription factor SHINE 2               |
| 504 | A_84_P767924 | -2.37 | AT5G11320 | flavin-binding monooxygenase family protein                    |
| 505 | A_84_P768330 | -2.29 | AT5G11510 | myb domain protein 3r-4                                        |
| 506 | A_84_P23416  | -4.00 | AT5G11820 | self-incompatibility S1 family protein                         |
| 507 | A_84_P231259 | -4.05 | AT5G12330 | lateral root primordium protein-like protein (LRP1)            |
| 508 | A_84_P15851  | -2.76 | AT5G12940 | leucine-rich repeat-containing protein                         |
| 509 | A_84_P274830 | -2.37 | AT5G12990 | protein CLAVATA3/ESR-related 40                                |
| 510 | A_84_P23420  | -2.43 | AT5G13580 | ABC transporter G family member 6                              |
| 511 | A_84_P595747 | -2.52 | AT5G13900 | lipid transfer-like protein VAS                                |
| 512 | A_84_P834918 | -3.17 | AT5G14230 | hypothetical protein                                           |
| 513 | A_84_P19794  | -2.17 | AT5G14750 | transcription factor WER (MYB66)                               |
| 514 | A_84_P17749  | -4.55 | AT5G15120 | hypothetical protein                                           |
| 515 | A_84_P515827 | -2.68 | AT5G15340 | pentatricopeptide repeat-containing protein                    |
| 516 | A_84_P728426 | -4.22 | AT5G15995 | mutator-like transposase family protein                        |
| 517 | A_84_P13968  | -2.34 | AT5G16410 | HXXXD-type acyl-transferase-like protein                       |
| 518 | A_84_P769226 | -3.01 | AT5G17795 | hypothetical protein                                           |
| 519 | A_84_P18699  | -3.17 | AT5G17800 | myb domain protein 56 (MYB56)                                  |
| 520 | A_84_P23434  | -2.74 | AT5G19040 | adenylate isopentenyltransferase 5 (IPT5)                      |
| 521 | A_84_P286080 | -2.09 | AT5G19410 | ABC transporter G family member 23                             |
| 522 | A_84_P177214 | -4.89 | AT5G19600 | putative sulfate transporter 3.5                               |

|     |              |       |           |                                                                                |
|-----|--------------|-------|-----------|--------------------------------------------------------------------------------|
| 523 | A_84_P541541 | -2.39 | AT5G20640 | hypothetical protein                                                           |
| 524 | A_84_P272600 | -4.86 | AT5G21960 | ethylene-responsive transcription factor ERF016                                |
| 525 | A_84_P824908 | -2.37 | AT5G22460 | esterase/lipase/thioesterase family protein                                    |
| 526 | A_84_P16815  | -2.27 | AT5G22810 | GDSL esterase/lipase                                                           |
| 527 | A_84_P787281 | -3.13 | AT5G23260 | protein TRANSPARENT TESTA 16 (TT16)                                            |
| 528 | A_84_P16819  | -2.64 | AT5G23940 | BAHD acyltransferase DCR (PEL3)                                                |
| 529 | A_84_P20603  | -2.13 | AT5G23990 | ferric reduction oxidase 5 (FRO5)                                              |
| 530 | A_84_P19658  | -7.79 | AT5G24240 | phosphatidylinositol 3- and 4-kinase family protein / ubiquitin family protein |
| 531 | A_84_P511413 | -2.05 | AT5G24250 | hypothetical protein                                                           |
| 532 | A_84_P18713  | -2.20 | AT5G24510 | large subunit ribosomal protein LP1                                            |
| 533 | A_84_P867371 | -2.21 | AT5G25090 | early nodulin-like protein 3 (ENODL13)                                         |
| 534 | A_84_P10206  | -3.81 | AT5G25160 | zinc finger protein 3 (ZFP3)                                                   |
| 535 | A_84_P23446  | -2.03 | AT5G25390 | ethylene-responsive transcription factor SHINE 3 (SHN2)                        |
| 536 | A_84_P11153  | -4.28 | AT5G25420 | putative nucleobase-ascorbate transporter 9                                    |
| 537 | A_84_P20610  | -3.85 | AT5G25880 | malate dehydrogenase (oxaloacetate-decarboxylating)(NADP+) (NADP-ME3)          |
| 538 | A_84_P574390 | -2.46 | AT5G26050 | self-incompatibility S1 family protein                                         |
| 539 | A_84_P838601 | -3.25 | AT5G26090 | self-incompatibility S1 family protein                                         |
| 540 | A_84_P66934  | -2.26 | AT5G26630 | MADS-box protein AGL35                                                         |
| 541 | A_84_P87749  | -2.21 | AT5G27570 | cell division cycle 20, cofactor of APC complex                                |
| 542 | A_84_P527390 | -2.61 | AT5G28490 | hypothetical protein (LSH1)                                                    |
| 543 | A_84_P767466 | -2.42 | AT5G28525 | hypothetical protein                                                           |
| 544 | A_84_P765990 | -2.55 | AT5G28712 | hypothetical protein                                                           |
| 545 | A_84_P766917 | -2.53 | AT5G28888 | similar to terpenoid cyclase/protein prenyltransferase alpha-alpha toroid      |
| 546 | A_84_P16836  | -2.65 | AT5G35390 | leucine-rich repeat protein kinase-like protein                                |
| 547 | A_84_P198944 | -4.23 | AT5G36000 | hypothetical protein                                                           |

|     |              |       |           |                                                                      |
|-----|--------------|-------|-----------|----------------------------------------------------------------------|
| 548 | A_84_P593141 | -2.29 | AT5G36280 | hypothetical protein                                                 |
| 549 | A_84_P840966 | -4.75 | AT5G36870 | callose synthase (GSL09)                                             |
| 550 | A_84_P556641 | -2.12 | AT5G36960 | hypothetical protein                                                 |
| 551 | A_84_P839463 | -2.65 | AT5G37478 | TPX2 (targeting protein for Xklp2) family protein                    |
| 552 | A_84_P767553 | -4.07 | AT5G37940 | 2-alkenal reductase                                                  |
| 553 | A_84_P549559 | -2.44 | AT5G38100 | putative S-adenosylmethionine-dependent methyltransferase            |
| 554 | A_84_P767563 | -2.45 | AT5G38320 | hypothetical protein                                                 |
| 555 | A_84_P18737  | -3.75 | AT5G38710 | proline dehydrogenase 2                                              |
| 556 | A_84_P216298 | -2.93 | AT5G38930 | germin-like protein subfamily 1 member 10                            |
| 557 | A_84_P287700 | -4.36 | AT5G38940 | germin-like protein subfamily 1 member 11                            |
| 558 | A_84_P20630  | -2.05 | AT5G38970 | brassinosteroid-6-oxidase 1 (BR6OX1)                                 |
| 559 | A_84_P841984 | -2.81 | AT5G39220 | hydrolase, alpha/beta fold family protein                            |
| 560 | A_84_P14955  | -3.36 | AT5G39220 | hydrolase, alpha/beta fold family protein                            |
| 561 | A_84_P206178 | -2.92 | AT5G39420 | cyclin-dependent kinase (CDC2C)                                      |
| 562 | A_84_P23470  | -2.17 | AT5G39720 | avirulence induced protein 2 like protein (AIG2L)                    |
| 563 | A_84_P128141 | -3.44 | AT5G39890 | hypothetical protein                                                 |
| 564 | A_84_P80109  | -2.80 | AT5G40630 | ubiquitin family protein                                             |
| 565 | A_84_P841998 | -2.74 | AT5G40645 | RPM1-interacting protein 4 (RIN4)                                    |
| 566 | A_84_P595814 | -2.94 | AT5G40800 | hypothetical protein                                                 |
| 567 | A_84_P768200 | -2.53 | AT5G41663 | a microRNA                                                           |
| 568 | A_84_P525626 | -4.20 | AT5G42610 | hypothetical protein                                                 |
| 569 | A_84_P551331 | -3.76 | AT5G42655 | disease resistance-responsive (dirigent-like protein) family protein |
| 570 | A_84_P17806  | -5.06 | AT5G42800 | dihydroflavonol-4-reductase (DFR)                                    |
| 571 | A_84_P507895 | -2.03 | AT5G43240 | hypothetical protein                                                 |
| 572 | A_84_P22538  | -4.21 | AT5G43530 | helicase protein with RING/U-box domain                              |

|     |              |       |           |                                                                                |
|-----|--------------|-------|-----------|--------------------------------------------------------------------------------|
| 573 | A_84_P150218 | -3.75 | AT5G43935 | flavonol synthase 6 (FLS6)                                                     |
| 574 | A_84_P20649  | -2.60 | AT5G44350 | ethylene-responsive nuclear protein -like protein                              |
| 575 | A_84_P21595  | -3.30 | AT5G44360 | FAD-binding and BBE domain-containing protein                                  |
| 575 | A_84_P766117 | -2.88 | AT5G44418 | hypothetical protein                                                           |
| 576 | A_84_P18762  | -2.64 | AT5G45580 | transcription factor                                                           |
| 577 | A_84_P13089  | -2.87 | AT5G45730 | cysteine/histidine-rich C1 domain-containing protein                           |
| 578 | A_84_P833384 | -2.00 | AT5G45830 | delay of germination 1 protein (DOG1)                                          |
| 579 | A_84_P552230 | -2.81 | AT5G46090 | hypothetical protein                                                           |
| 580 | A_84_P21605  | -3.30 | AT5G46830 | transcription factor bHLH28 (NIG1)                                             |
| 581 | A_84_P10259  | -2.12 | AT5G47160 | YDG/SRA domain-containing protein                                              |
| 582 | A_84_P10265  | -3.79 | AT5G48650 | nuclear transport factor 2 and RNA recognition motif domain-containing protein |
| 583 | A_84_P768175 | -3.54 | AT5G48953 | defensin-like protein 76 (LCR86)                                               |
| 584 | A_84_P585163 | -2.74 | AT5G49120 | hypothetical protein                                                           |
| 585 | A_84_P245725 | -2.73 | AT5G50010 | transcription factor bHLH145                                                   |
| 586 | A_84_P18780  | -2.45 | AT5G50120 | transducin/WD40 domain-containing protein                                      |
| 587 | A_84_P192414 | -2.37 | AT5G51790 | transcription factor bHLH120                                                   |
| 588 | A_84_P15948  | -4.49 | AT5G51900 | cytochrome P450 family protein                                                 |
| 589 | A_84_P858221 | -2.16 | AT5G51950 | glucose-methanol-choline (GMC) oxidoreductase family protein                   |
| 590 | A_84_P582478 | -2.28 | AT5G52330 | meprin and TRAF homology domain-containing protein                             |
| 591 | A_84_P14060  | -2.52 | AT5G52860 | ABC transporter G family member 8                                              |
| 592 | A_84_P573586 | -2.08 | AT5G53260 | seed maturation protein                                                        |
| 593 | A_84_P590512 | -2.72 | AT5G53660 | growth-regulating factor 7 (GRF7)                                              |
| 594 | A_84_P251745 | -2.84 | AT5G53840 | F-box/FBD/LRR-repeat protein                                                   |
| 595 | A_84_P22576  | -3.01 | AT5G53950 | protein CUP-SHAPED COTYLEDON 2 (CUC2)                                          |
| 596 | A_84_P16901  | -2.94 | AT5G54060 | UDP-glucose:flavonoid 3-o-glucosyltransferase (UF3GT)                          |

|     |              |       |           |                                                                  |
|-----|--------------|-------|-----------|------------------------------------------------------------------|
| 597 | A_84_P521249 | -3.40 | AT5G54400 | S-adenosyl-L-methionine-dependent methyltransferase-like protein |
| 598 | A_84_P13124  | -2.26 | AT5G55340 | putative long-chain-alcohol O-fatty-acyltransferase 5            |
| 599 | A_84_P15960  | -2.47 | AT5G55370 | putative long-chain-alcohol O-fatty-acyltransferase 2            |
| 600 | A_84_P10289  | -2.03 | AT5G55720 | pectate lyase                                                    |
| 601 | A_84_P583397 | -2.06 | AT5G55893 | hypothetical protein                                             |
| 602 | A_84_P829753 | -2.49 | AT5G56230 | PRA1 family protein G2 (PRA1.G2)                                 |
| 603 | A_84_P787112 | -2.14 | AT5G56490 | D-arabinono-1,4-lactone oxidase family protein                   |
| 604 | A_84_P11239  | -2.81 | AT5G56840 | myb-like transcription factor family protein                     |
| 605 | A_84_P14075  | -2.71 | AT5G57240 | OSBP(oxysterol binding protein)-related protein 4C (ORP4C)       |
| 606 | A_84_P522226 | -2.92 | AT5G57420 | auxin-responsive protein IAA33 (IAA33)                           |
| 607 | A_84_P14076  | -2.10 | AT5G57520 | zinc finger protein 2 (ZFP2)                                     |
| 608 | A_84_P19829  | -4.37 | AT5G58390 | peroxidase 67                                                    |
| 609 | A_84_P17864  | -3.55 | AT5G58860 | cytochrome P450 86A1 (CYP86A1)                                   |
| 610 | A_84_P583408 | -3.85 | AT5G59305 | hypothetical protein                                             |
| 611 | A_84_P767554 | -3.88 | AT5G59330 | lipid binding protein                                            |
| 612 | A_84_P298084 | -2.64 | AT5G60180 | pumilio 19 (PUM19)                                               |
| 613 | A_84_P134445 | -3.02 | AT5G60760 | 2-phosphoglycerate kinase-related protein                        |
| 614 | A_84_P23549  | -3.42 | AT5G60830 | basic leucine-zipper 70 (bZIP70)                                 |
| 615 | A_84_P531900 | -2.18 | AT5G61050 | histone deacetylase-like protein                                 |
| 616 | A_84_P869736 | -3.02 | AT5G62165 | protein agamous-like 42 (AGL42)                                  |
| 617 | A_84_P843385 | -4.01 | AT5G63090 | protein LATERAL ORGAN BOUNDARIES (LOB)                           |
| 618 | A_84_P67354  | -2.13 | AT5G63580 | flavonol synthase 2 (FLS2)                                       |
| 619 | A_84_P21669  | -2.11 | AT5G63590 | flavonol synthase 3 (FLS3)                                       |
| 620 | A_84_P859664 | -2.06 | AT5G63600 | flavonol synthase 5 (FLS5)                                       |
| 621 | A_84_P15996  | -2.12 | AT5G64110 | peroxidase 70                                                    |



|     |              |       |           |                                                                  |
|-----|--------------|-------|-----------|------------------------------------------------------------------|
| 622 | A_84_P597689 | -3.45 | AT5G65340 | hypothetical protein                                             |
| 623 | A_84_P88939  | -2.77 | AT5G65510 | AINTEGUMENTA-like 7 protein (AIL7)                               |
| 624 | A_84_P20731  | -2.47 | AT5G65530 | protein kinase family protein                                    |
| 625 | A_84_P501762 | -2.03 | AT5G66340 | hypothetical protein                                             |
| 626 | A_84_P20735  | -2.19 | AT5G66430 | S-adenosyl-L-methionine-dependent methyltransferase-like protein |
| 627 | A_84_P20736  | -2.17 | AT5G66700 | homeobox-leucine zipper protein ATHB-53 (HB53)                   |
| 628 | A_84_P21683  | -2.22 | AT5G66940 | dof zinc finger protein DOF5.8                                   |
| 629 | A_84_P513341 | -4.32 | AT5G66980 | putative B3 domain-containing protein                            |

**Table S3.** Comparative analysis of the genes enriched in specific GO terms between the transcriptomes of leaves of *igr2-9* and wild-type *Arabidopsis* at 29 days after sowing (DAS). The specific GO terms were those cited in Fig. S3F. The obtained data sets of the leaves at 29 DAS were referred to the report by Breeze et al. (2011).

| <b>Response to oxidative stress</b> |                                                 |             |                                                                                     |                          |                                                            |
|-------------------------------------|-------------------------------------------------|-------------|-------------------------------------------------------------------------------------|--------------------------|------------------------------------------------------------|
| <b>Leaves at 29 DAS</b>             |                                                 | <i>igr2</i> |                                                                                     | <b>Overlapping genes</b> |                                                            |
| AT1G13340                           | Unknown protein                                 | AT1G72660   | P-loop containing nucleoside triphosphate hydrolases superfamily protein            | AT1G65040                | Homologs of the yeast/human Hrd1 protein (HRD1B)           |
| AT1G11210                           | Unknown protein                                 | AT2G21640   | Hypothetical protein                                                                | AT5G24110                | WRKY transcription factor 30 (WRKY30)                      |
| AT2G19310                           | HSP20-like chaperones superfamily protein       | AT1G44414   | Unknown protein                                                                     | AT5G64930                | Constitutive expression of pr genes 5 (CPR5)               |
| AT4G00940                           | Dof-type zinc finger DNA-binding family protein | AT1G17860   | Kunitz family trypsin and protease inhibitor protein                                | AT5G05410                | Dehydration-responsive element-binding protein 2A (DREB2A) |
| AT2G46600                           | Calcium-binding EF-hand family protein          | AT5G07330   | Unknown protein                                                                     | AT5G35320                | Unknown protein                                            |
| AT1G78420                           | RING/U-box superfamily protein                  | AT1G54840   | HSP20-like chaperones superfamily protein                                           | AT1G03850                | Glutaredoxin 13 (GRXS13)                                   |
| AT3G14430                           | Unknown protein                                 | AT4G18450   | Ethylene response factor subfamily B-3 of ERF/AP2 transcription factor family (ERF) | AT4G25380                | Stress-associated protein 10 (SAP10)                       |
| AT4G16190                           | Papain family cysteine protease                 | AT1G72060   | Serine-type endopeptidase inhibitors                                                | AT2G47000                | ABC transporter B family member 4 (ABCB4)                  |

|           |                                          |           |                                               |           |                                                                                         |
|-----------|------------------------------------------|-----------|-----------------------------------------------|-----------|-----------------------------------------------------------------------------------------|
| AT5G59080 | Unknown protein                          | AT1G78410 | VQ motif-containing protein                   | AT1G78410 | VQ motif-containing protein                                                             |
| AT1G78410 | VQ motif-containing protein              | AT5G51440 | HSP20-like chaperones superfamily protein     | AT5G39610 | NAC domain containing protein 2 (NAC2)                                                  |
| AT4G33940 | RING/U-box superfamily protein           | AT3G25190 | Vacuolar iron transporter-like protein        | AT4G23493 | Unknown protein                                                                         |
| AT1G19020 | unknown protein                          | AT1G14200 | RING/U-box superfamily protein                | AT1G52200 | PLAC8 family protein                                                                    |
| AT1G14200 | RING/U-box superfamily protein           | AT1G52200 | PLAC8 family protein                          | AT1G14870 | Plant cadmium resistance 2 (PCR2)                                                       |
| AT3G10020 | Unknown protein                          | AT2G20940 | Unknown function                              | AT4G02380 | Late embryogenesis abundant like protein (SAG21)                                        |
| AT5G47830 | Unknown protein                          | AT5G37670 | HSP20-like chaperones superfamily protein     | AT3G17790 | Expression is upregulated in the shoot of <i>cax1/cax3</i> mutant (PAP17)               |
| AT5G19875 | Unknown protein                          | AT5G35320 | Unknown protein                               | AT1G27730 | Cys2/His2-type zinc-finger protein                                                      |
| AT1G52200 | PLAC8 family protein                     | AT2G30480 | Unknown protein                               | AT4G35770 | Senescence 1 (SEN1)                                                                     |
| AT4G13820 | Leucine-rich repeat (LRR) family protein | AT4G23493 | Unknown protein                               | AT3G51910 | Heat shock transcription factor a7a (HSFA7A)                                            |
| AT1G64360 | Unknown protein                          | AT1G30070 | SGS domain-containing protein                 | AT1G14200 | RING/U-box superfamily protein                                                          |
| AT1G50290 | Unknown protein                          | AT3G25250 | Serine/threonine-protein kinase OXI1 (AGC2-1) | AT3G62770 | protein required for autophagosome formation during nutrient deprivation and senescence |

|           |                                                         |           |                                                                                         |  |  |
|-----------|---------------------------------------------------------|-----------|-----------------------------------------------------------------------------------------|--|--|
| AT4G01280 | Homeodomain-like superfamily protein                    | AT4G23810 | Putative WRKY transcription factor 53 (WRKY53)                                          |  |  |
| AT1G64610 | Transducin/WD40 repeat-like superfamily protein         | AT2G19590 | Aminocyclopropanecarboxylate oxidase (ACO1)                                             |  |  |
| AT5G39730 | AIG2-like family protein                                | AT2G47000 | ABC transporter B family member 4 (ABCB4)                                               |  |  |
| AT4G11170 | Disease resistance protein (TIR-NBS-LRR class) family   | AT3G62770 | Protein required for autophagosome formation during nutrient deprivation and senescence |  |  |
| AT5G35320 | Unknown protein                                         | AT2G46240 | Bcl-2-associated athanogene protein (BAG6)                                              |  |  |
| AT1G80130 | Tetratricopeptide repeat (TPR)-like superfamily protein | AT5G20230 | Blue copper binding protein (SAG14)                                                     |  |  |
| AT4G23493 | Unknown protein                                         | AT5G63160 | BTB and TAZ domain protein.                                                             |  |  |
| AT3G01420 | Alpha-dioxygenase(DOX1)                                 | AT3G48360 | BTB and TAZ domain protein 2 (BT2)                                                      |  |  |
| AT5G02490 | Heat shock protein 70 (Hsp 70) family protein(Hsp70-2)  | AT1G76080 | Thioredoxin (CDSP32)                                                                    |  |  |
| AT2G06530 | VPS2.1                                                  | AT5G64930 | Regulator of pathogenesis-related (PR) genes (HYS1)                                     |  |  |
| AT4G26080 | ABA insensitive 1 (ABI1)                                | AT5G05410 | Dehydration-responsive element-binding protein 2A (DREB2A)                              |  |  |
| AT5G59880 | Actin depolymerizing factor 3 (ADF3)                    | AT3G63060 | F-box protein (EDL3)                                                                    |  |  |

|           |                                                                                         |           |                                                                                      |  |  |
|-----------|-----------------------------------------------------------------------------------------|-----------|--------------------------------------------------------------------------------------|--|--|
| AT2G47000 | ABC transporter B family member 4 (ABCB4)                                               | AT4G17490 | Ethylene response factor subfamily B-3 of ERF/AP2 transcription factor family (ERF6) |  |  |
| AT3G62770 | Protein required for autophagosome formation during nutrient deprivation and senescence | AT2G47180 | Galactinol synthase (GOLS1)                                                          |  |  |
| AT5G53400 | Bobber1 (BOB1)                                                                          | AT1G03850 | Glutaredoxin 13 (GRXS13)                                                             |  |  |
| AT5G42380 | Calmodulin like 37 (CML37)                                                              | AT1G02930 | Glutathione transferase                                                              |  |  |
| AT1G10500 | Chloroplast-localized ischa-like protein (CPISCA)                                       | AT3G04120 | Cytosolic GADPH C subunit (GAPC1)                                                    |  |  |
| AT5G64930 | Constitutive expression of pr genes 5 (CPR5)                                            | AT3G51910 | Heat stress transcription factor                                                     |  |  |
| AT2G40880 | Cystatin a (CYSA)                                                                       | AT1G65040 | Homologs of the yeast/human Hrd1 protein (HRD1B)                                     |  |  |
| AT5G05410 | Dehydration-responsive element-binding protein 2A (DREB2A)                              | AT4G12400 | Carboxylate clamp-tetratricopeptide repeat proteins                                  |  |  |
| AT3G20770 | Ethylene-insensitive3 (EIN3)                                                            | AT1G73260 | Kunitz trypsin inhibitor 1 (KTI1)                                                    |  |  |
| AT1G73730 | Ethylene-insensitive3-like 3 (EIL3)                                                     | AT3G05790 | Lon protease 4 (LON4)                                                                |  |  |
| AT2G26300 | G protein alpha subunit 1 (GP alpha 1)                                                  | AT1G16420 | Cysteine-type endopeptidase (MC8)                                                    |  |  |
| AT2G46270 | G-box binding factor 3 (GBF3)                                                           | AT5G39610 | NAC domain containing protein 2 (NAC2)                                               |  |  |

|           |                                              |           |                                                                    |  |  |
|-----------|----------------------------------------------|-----------|--------------------------------------------------------------------|--|--|
| AT3G63010 | GA insensitive dwarf1b (GID1b)               | AT5G04950 | Nicotianamine synthase 1 (NAS1)                                    |  |  |
| AT1G56600 | Galactinol synthase 2 (GOLS2)                | AT1G04980 | Disulfide isomerase-like protein (PDI10)                           |  |  |
| AT1G03850 | Glutaredoxin 13 (GRXS13)                     | AT1G14870 | Cadmium resistance protein 2 (PCR2)                                |  |  |
| AT5G02790 | Glutathione transferase I3 (GSTI3)           | AT3G17790 | Expression is upregulated in the shoot of cax1/cax3 mutant (PAP17) |  |  |
| AT3G51910 | Heat shock transcription factor A7A (HSFA7A) | AT3G16050 | Pyridocine biosynthesis 1.2 (PDX1.2)                               |  |  |
| AT1G65040 | Homolog of yeast hrd1 (HRD1B)                | AT3G25230 | FK506 binding protein (FKBP62)                                     |  |  |
| AT4G20380 | Lesion simulating disease (LSD1)             | AT1G27730 | Cys2/His2-type zinc-finger protein                                 |  |  |
| AT2G18170 | MAP kinase 7 (MPK7)                          | AT4G35770 | Senescence 1 (SEN1)                                                |  |  |
| AT1G60870 | Maternal effect embryo arrest 9 (MEE9)       | AT4G02380 | Late embryogenesis abundant like protein (SAG21)                   |  |  |
| AT4G04800 | Methionine sulfoxide reductase b3 (MSRB3)    | AT4G25380 | Stress-associated protein 10(SAP10)                                |  |  |
| AT1G10210 | Mitogen-activated protein kinase 1 (MPK1)    | AT1G05680 | UDP-glucosyltransferase (UGT74E2)                                  |  |  |
| AT3G24500 | Multiprotein bridging factor 1c (MBF1c)      | AT5G24110 | WRKY DNA-binding protein 30 (WRKY30)                               |  |  |
| AT5G39610 | NAC domain containing protein 2 (NAC2)       | AT4G24240 | Ca-dependent calmodulin binding protein (WRKY7)                    |  |  |

|           |                                                                    |  |  |  |  |
|-----------|--------------------------------------------------------------------|--|--|--|--|
| AT3G51610 | No primexine and plasma membrane undulation (NPU)                  |  |  |  |  |
| AT5G06960 | Ocs-element binding factor 5 (OBF5)                                |  |  |  |  |
| AT2G40000 | Ortholog of sugar beet hs1 pro-1 2 (HSPRO2)                        |  |  |  |  |
| AT5G59420 | Osbp(oxysterol binding protein)-related protein 3c (ORP3C)         |  |  |  |  |
| AT5G61640 | Peptidomethionine sulfoxide reductase 1 (PMSR1)                    |  |  |  |  |
| AT5G07470 | Peptidomethionine sulfoxide reductase 3 (PMSR3)                    |  |  |  |  |
| AT3G02800 | Plant and fungi atypical dual-specificity phosphatase 3 (PFA-DSP3) |  |  |  |  |
| AT1G14870 | Plant cadmium resistance 2 (PCR2)                                  |  |  |  |  |
| AT3G17790 | Expression is upregulated in the shoot of cax1/cax3 mutant (PAP17) |  |  |  |  |
| AT1G69270 | Receptor-like protein kinase 1 (RPK1)                              |  |  |  |  |
| AT5G59820 | Responsive to high light 41 (RHL41)                                |  |  |  |  |

|                                            |                                       |             |                                                                          |                          |                                                  |
|--------------------------------------------|---------------------------------------|-------------|--------------------------------------------------------------------------|--------------------------|--------------------------------------------------|
| AT1G27730                                  | Cys2/His2-type zinc-finger protein    |             |                                                                          |                          |                                                  |
| AT3G55460                                  | Sc35-like splicing factor 30 (SCL30)  |             |                                                                          |                          |                                                  |
| AT3G57520                                  | Seed imbibition 2 (SIP2)              |             |                                                                          |                          |                                                  |
| AT4G35770                                  | Senescence 1 (SEN1)                   |             |                                                                          |                          |                                                  |
| AT4G02380                                  | Senescence-associated gene 21 (SAG21) |             |                                                                          |                          |                                                  |
| AT2G35510                                  | Similar to rcd one 1 (SRO1)           |             |                                                                          |                          |                                                  |
| AT4G25380                                  | Stress-associated protein 10 (SAP10)  |             |                                                                          |                          |                                                  |
| AT1G45145                                  | Thioredoxin h-type 5 (TRX5)           |             |                                                                          |                          |                                                  |
| AT5G37770                                  | Touch 2 (TCH2)                        |             |                                                                          |                          |                                                  |
| AT5G64510                                  | Tunicamycin induced 1 (TIN1)          |             |                                                                          |                          |                                                  |
| AT4G29380                                  | Vacuolar protein sorting 15 (VPS15)   |             |                                                                          |                          |                                                  |
| AT5G24110                                  | WRKY transcription factor 30 (WRKY30) |             |                                                                          |                          |                                                  |
| AT4G34890                                  | Xanthine dehydrogenase 1 (XDH1)       |             |                                                                          |                          |                                                  |
| <b>Response to reactive oxygen species</b> |                                       |             |                                                                          |                          |                                                  |
| <b>Leaves at 29 DAS</b>                    |                                       | <i>igr2</i> |                                                                          | <b>Overlapping genes</b> |                                                  |
| AT4G16190                                  | Papain family cysteine protease       | AT1G72660   | P-loop containing nucleoside triphosphate hydrolases superfamily protein | AT1G65040                | Homologs of the yeast/human Hrd1 protein (HRD1B) |



|           |                                                       |           |                                                                                     |           |                                                                    |
|-----------|-------------------------------------------------------|-----------|-------------------------------------------------------------------------------------|-----------|--------------------------------------------------------------------|
| AT4G33940 | RING/U-box superfamily protein                        | AT4G18450 | Ethylene response factor subfamily B-3 of ERF/AP2 transcription factor family (ERF) | AT5G24110 | WRKY transcription factor 30 (WRKY30)                              |
| AT5G47830 | Unknown protein                                       | AT1G14200 | RING/U-box superfamily protein                                                      | AT5G64930 | Constitutive expression of pr genes 5 (CPR5)                       |
| AT1G14200 | RING/U-box superfamily protein                        | AT3G25190 | Nodulin-like protein 21                                                             | AT5G05410 | Dehydration-responsive element-binding protein 2A (DREB2A)         |
| AT4G13820 | Leucine-rich repeat (LRR) family protein              | AT5G51440 | HSP20-like chaperones superfamily protein                                           | AT5G35320 | Unknown protein                                                    |
| AT2G19310 | HSP20-like chaperones superfamily protein             | AT2G20940 | Unknown protein                                                                     | AT4G25380 | Stress-associated protein 10 (SAP10)                               |
| AT1G64610 | Transducin/WD40 repeat-like superfamily protein       | AT1G44414 | Unknown protein                                                                     | AT2G47000 | ABC transporter B family member 4 (ABCB4)                          |
| AT4G01280 | Homeodomain-like superfamily protein                  | AT1G17860 | Kunitz family trypsin and protease inhibitor protein                                | AT5G39610 | NAC domain containing protein 2 (NAC2)                             |
| AT4G00940 | Dof-type zinc finger DNA-binding family protein       | AT5G07330 | Unknown protein                                                                     | AT4G23493 | Unknown protein                                                    |
| AT5G35320 | Unknown protein                                       | AT1G54840 | HSP20-like chaperones superfamily protein                                           | AT4G02380 | Senescence-associated gene 21 (SAG21)                              |
| AT4G11170 | Disease resistance protein (TIR-NBS-LRR class) family | AT5G37670 | HSP20-like chaperones superfamily protein                                           | AT3G17790 | Expression is upregulated in the shoot of cax1/cax3 mutant (PAP17) |
| AT5G39730 | AIG2-like (avirulence induced gene) family protein    | AT5G35320 | Unknown protein                                                                     | AT3G51910 | Heat shock transcription factor a7a (HSFA7A)                       |

|           |                                                            |           |                                                                                      |           |                                |
|-----------|------------------------------------------------------------|-----------|--------------------------------------------------------------------------------------|-----------|--------------------------------|
| AT2G46600 | Calcium-binding EF-hand family protein                     | AT2G30480 | Unknown protein                                                                      | AT1G14200 | RING/U-box superfamily protein |
| AT1G78420 | RING/U-box superfamily protein                             | AT1G30070 | SGS domain-containing protein                                                        |           |                                |
| AT4G23493 | Unknown protein                                            | AT4G23493 | Unknown protein                                                                      |           |                                |
| AT3G01420 | Alpha-dioxygenase(DOX1)                                    | AT4G23810 | WRKY Transcription Factor(WRKY53)                                                    |           |                                |
| AT5G02490 | Heat shock protein 70 (Hsp 70) family protein(Hsp70-2)     | AT2G19590 | Aminocyclopropanecarboxylate oxidase (ACO1)                                          |           |                                |
| AT2G06530 | VPS2.1                                                     | AT2G47000 | ABC transporter B family member 4 (ABCB4)                                            |           |                                |
| AT4G26080 | ABA insensitive 1 (ABI1)                                   | AT2G46240 | Bcl-2-associated athanogene protein (BAG6)                                           |           |                                |
| AT2G47000 | ABC transporter B family member 4 (ABCB4)                  | AT5G63160 | Bcl-2-associated athanogene 6 (BAG6)                                                 |           |                                |
| AT5G53400 | Bobber1 (BOB1)                                             | AT3G48360 | BTB and TAZ domain protein.                                                          |           |                                |
| AT5G42380 | Calmodulin like 37 (CML37)                                 | AT5G64930 | Regulator of pathogenesis-related (PR) genes (HYS1)                                  |           |                                |
| AT1G10500 | Chloroplast-localized isca-like protein (CPISCA)           | AT5G05410 | Dehydration-responsive element-binding protein 2A (DREB2A)                           |           |                                |
| AT5G64930 | Constitutive expression of pr genes 5 (CPR5)               | AT3G63060 | F-box protein (EDL3)                                                                 |           |                                |
| AT5G05410 | Dehydration-responsive element-binding protein 2A (DREB2A) | AT4G17490 | Ethylene response factor subfamily B-3 of ERF/AP2 transcription factor family (ERF6) |           |                                |

|           |                                                  |           |                                                                    |  |  |
|-----------|--------------------------------------------------|-----------|--------------------------------------------------------------------|--|--|
| AT3G20770 | Ethylene-insensitive3 (EIN3)                     | AT2G47180 | Galactinol synthase (GOLS1)                                        |  |  |
| AT1G73730 | Ethylene-insensitive3-like 3 (E3)                | AT3G04120 | Cytosolic GADPH C subunit (GAPC1)                                  |  |  |
| AT2G26300 | G protein alpha subunit 1 (GP alpha 1)           | AT3G51910 | Heat stress transcription factor                                   |  |  |
| AT2G46270 | G-box binding factor 3 (GBF3)                    | AT1G65040 | Homologs of the yeast/human Hrd1 protein (HRD1B)                   |  |  |
| AT3G63010 | GA insensitive dwarf1b (G1B)                     | AT4G12400 | Carboxylate clamp-tetratricopeptide repeat proteins                |  |  |
| AT5G02790 | Glutathione transferase l3 (GSTl3)               | AT1G73260 | Kunitz trypsin inhibitor 1 (KTI1)                                  |  |  |
| AT3G51910 | Heat shock transcription factor a7a (HSFA7A)     | AT1G16420 | cysteine-type endopeptidase (MC8)                                  |  |  |
| AT1G65040 | Homologs of the yeast/human Hrd1 protein (HRD1B) | AT5G39610 | NAC-domain transcription factor (NAC2)                             |  |  |
| AT4G20380 | Lesion simulating disease (LSD1)                 | AT5G04950 | NAC domain containing protein 2 (NAC2)                             |  |  |
| AT2G18170 | MAP kinase 7 (MPK7)                              | AT1G04980 | Disulfide isomerase-like protein (PDI10)synthase 1 (NAS1)          |  |  |
| AT1G60870 | Maternal effect embryo arrest 9 (MEE9)           | AT3G17790 | Expression is upregulated in the shoot of cax1/cax3 mutant (PAP17) |  |  |
| AT1G10210 | Mitogen-activated protein kinase 1 (MPK1)        | AT3G16050 | Pyridocine biosynthesis 1.2 (PDX1.2)                               |  |  |
| AT3G24500 | Multiprotein bridging factor 1c (MBF1c)          | AT3G25230 | FK506 binding protein (FKBP62)                                     |  |  |

|           |                                                                    |           |                                                  |  |  |
|-----------|--------------------------------------------------------------------|-----------|--------------------------------------------------|--|--|
| AT5G39610 | NAC domain containing protein 2 (NAC2)                             | AT4G02380 | Late embryogenesis abundant like protein (SAG21) |  |  |
| AT5G06960 | Ocs-element binding factor 5 (OBF5)                                | AT4G25380 | Senescence-associated gene 21 (SAG21)            |  |  |
| AT5G59420 | OSBP(oxysterol binding protein)-related protein 3c (ORP3C)         | AT1G05680 | UDP-glucosyltransferase (UGT74E2)                |  |  |
| AT3G02800 | Plant and fungi atypical phosphatase 3 (PFA-DSP3)                  | AT5G24110 | WRKY DNA-binding protein 30 (WRKY30)             |  |  |
| AT3G17790 | Expression is upregulated in the shoot of cax1/cax3 mutant (PAP17) | AT4G24240 | Ca-dependent calmodulin binding protein (WRKY7)  |  |  |
| AT1G69270 | Receptor-like protein kinase 1 (RPK1)                              |           | WRKY transcription factor 7 (WRKY7)              |  |  |
| AT4G02380 | Late embryogenesis abundant like protein (SAG21)                   |           |                                                  |  |  |
| AT4G25380 | Stress-associated protein 10 (SAP10)                               |           |                                                  |  |  |
| AT5G37770 | Touch 2 (TCH2)                                                     |           |                                                  |  |  |
| AT5G64510 | Tunicamycin induced 1 (TIN1)                                       |           |                                                  |  |  |
| AT4G29380 | Vacuolar protein sorting 15 (VPS15)                                |           |                                                  |  |  |
| AT5G24110 | WRKY transcription factor 30 (WRKY30)                              |           |                                                  |  |  |
| AT4G34890 | Xanthine dehydrogenase 1 (XDH1)                                    |           |                                                  |  |  |

| <b>Response to hydrogen peroxide</b> |                                                    |             |                                                                                                     |                          |                                                                           |
|--------------------------------------|----------------------------------------------------|-------------|-----------------------------------------------------------------------------------------------------|--------------------------|---------------------------------------------------------------------------|
| <b>Leaves at 29 DAS</b>              |                                                    | <i>igr2</i> |                                                                                                     | <b>Overlapping genes</b> |                                                                           |
| AT4G26980                            | RNI-like superfamily protein                       | AT1G72660   | P-loop containing nucleoside triphosphate hydrolases superfamily protein                            | AT5G64930                | Constitutive expression of pr genes 5 (CPR5)                              |
| AT4G16190                            | Papain family cysteine protease                    | AT4G18450   | a member of the ERF (ethylene response factor) subfamily B-3 of ERF/AP2 transcription factor family | AT5G05410                | Dehydration-responsive element-binding protein 2A (DREB2A)                |
| AT1G14200                            | RING/U-box superfamily protein                     | AT1G14200   | RING/U-box superfamily protein                                                                      | AT5G35320                | unknown protein                                                           |
| AT2G19310                            | HSP20-like chaperones superfamily protein          | AT5G51440   | HSP20-like chaperones superfamily protein                                                           | AT1G73260                | Kunitz trypsin inhibitor 1 (KTIL)                                         |
| AT3G46930                            | Protein kinase superfamily protein                 | AT2G20940   | Unknown protein                                                                                     | AT4G23493                | unknown protein                                                           |
| AT4G00940                            | Dof-type zinc finger DNA-binding family protein    | AT1G44414   | Unknown protein                                                                                     | AT3G17790                | Expression is upregulated in the shoot of <i>cax1/cax3</i> mutant (PAP17) |
| AT5G35320                            | unknown protein                                    | AT1G17860   | Kunitz family trypsin and protease inhibitor protein                                                | AT3G51910                | Heat shock transcription factor a7a (HSFA7A)                              |
| AT5G39730                            | AIG2-like (avirulence induced gene) family protein | AT5G07330   | Unknown protein                                                                                     | AT1G14200                | RING/U-box superfamily protein                                            |
| AT2G20560                            | DNAJ heat shock family protein                     | AT1G54840   | HSP20-like chaperones superfamily protein                                                           |                          |                                                                           |
| AT2G46600                            | Calcium-binding EF-hand family protein             | AT5G37670   | HSP20-like chaperones superfamily protein                                                           |                          |                                                                           |

|           |                                                            |           |                                                            |  |  |
|-----------|------------------------------------------------------------|-----------|------------------------------------------------------------|--|--|
| AT4G23493 | unknown protein                                            | AT5G35320 | Unknown protein                                            |  |  |
| AT1G78420 | RING/U-box superfamily protein                             | AT2G30480 | Unknown protein                                            |  |  |
| AT5G03630 | ATMDAR2                                                    | AT1G30070 | SGS domain-containing protein                              |  |  |
| AT2G06530 | VPS2.1                                                     | AT4G23493 | Unknown protein                                            |  |  |
| AT5G60360 | Aleurain-like protease (ALP)                               | AT4G23810 | WRKY transcription Factor(WRKY53)                          |  |  |
| AT5G62000 | Auxin response factor 2 (ARF2)                             | AT2G46240 | Bcl-2-associated athanogene protein (BAG6)                 |  |  |
| AT1G10500 | Chloroplast-localized isca-like protein (CPISCA)           | AT5G63160 | Btb and taz domain protein 1 (BT1)                         |  |  |
| AT5G64930 | Constitutive expression of pr genes 5 (CPR5)               | AT3G48360 | Btb and taz domain protein 2 (BT2)                         |  |  |
| AT5G05410 | Dehydration-responsive element-binding protein 2A (DREB2A) | AT5G64930 | Constitutive expression of pr genes 5 (CPR5)               |  |  |
| AT1G47128 | Esponsive to dehydration 21a (RD21a)                       | AT5G05410 | Dehydration-responsive element-binding protein 2A (DREB2A) |  |  |
| AT5G01600 | Ferretin 1 (FER1)                                          | AT3G63060 | F-box protein (EDL3)                                       |  |  |
| AT2G42590 | General regulatory factor 9 (GRF9)                         | AT2G47180 | Galactinol synthase 1 (GOLS1)                              |  |  |
| AT5G02790 | Glutathione transferase l3 (GSTI3)                         | AT3G04120 | Cytosolic GADPH C subunit (GAPC1)                          |  |  |
| AT3G12580 | Heat shock protein 70 (HSP70)                              | AT3G51910 | Heat shock transcription factor a7a (HSFA7A)               |  |  |

|           |                                                                    |           |                                                                    |  |  |
|-----------|--------------------------------------------------------------------|-----------|--------------------------------------------------------------------|--|--|
| AT3G51910 | Heat shock transcription factor a7a (HSFA7A)                       | AT1G65040 | Homologs of the yeast/human Hrd1 protein (HRD1B)                   |  |  |
| AT1G73260 | Kunitz trypsin inhibitor 1 (KTIL)                                  | AT4G12400 | Carboxylate clamp-tetratricopeptide repeat proteins                |  |  |
| AT4G34120 | Loss of the timing of et and ja biosynthesis 1 (LEJ1)              | AT1G73260 | Kunitz trypsin inhibitor 1 (KTI1)                                  |  |  |
| AT3G19640 | Magnesium transporter 4 (MGT4)                                     | AT1G16420 | Cysteine-type endopeptidase (MC8)                                  |  |  |
| AT2G18170 | MAP kinase 7 (MPK7)                                                | AT1G04980 | Disulfide isomerase-like protein (PDI10)                           |  |  |
| AT1G60870 | Maternal effect embryo arrest 9 (MEE9)                             | AT3G17790 | Expression is upregulated in the shoot of cax1/cax3 mutant (PAP17) |  |  |
| AT3G24500 | Multiprotein bridging factor 1c (MBF1C)                            | AT3G16050 | Pyridoxine biosynthesis 1.2 (PDX1.2)                               |  |  |
| AT2G22240 | Myo-inositol-1-phosphate synthase 2 (MIPS2)                        | AT3G25230 | FK506 binding protein (FKBP62)                                     |  |  |
| AT5G59420 | OSBP(oxysterol binding protein)-related protein 3c (ORP3C)         | AT4G25380 | Stress-associated protein 10 (SAP10)                               |  |  |
| AT3G02800 | Plant and fungi atypical phosphatase 3 (PFA-DSP3)                  | AT1G05680 | UDP-glucosyltransferase (UGT74E2)                                  |  |  |
| AT3G17790 | Expression is upregulated in the shoot of cax1/cax3 mutant (PAP17) | AT5G24110 | WRKY transcription factor 30 (WRKY30)                              |  |  |
| AT5G42980 | Thioredoxin 3 (TRX3)                                               | AT4G24240 | Ca-dependent calmodulin binding protein (WRKY7)                    |  |  |

|                         |                                                              |             |                                                                                         |                          |                                                                     |
|-------------------------|--------------------------------------------------------------|-------------|-----------------------------------------------------------------------------------------|--------------------------|---------------------------------------------------------------------|
| AT5G37770               | Touch 2 (TCH2)                                               |             |                                                                                         |                          |                                                                     |
| AT4G12570               | Ubiquitin protein ligase 5 (UPI5)                            |             |                                                                                         |                          |                                                                     |
| <b>Leaf senescence</b>  |                                                              |             |                                                                                         |                          |                                                                     |
| <b>Leaves at 29 DAS</b> |                                                              | <i>igr2</i> |                                                                                         | <b>Overlapping genes</b> |                                                                     |
| AT4G35890               | Winged-helix DNA-binding transcription factor family protein | AT4G23810   | WRKY transcription factor(WRKY53)                                                       | AT2G35980                | Late embryogenesis abundant hydroxyproline-rich glycoprotein (YLS9) |
| AT1G73680               | Alpha dioxygenase (Alpha DOX2)                               | AT2G13810   | Agd2-like defense response protein 1 (ALD1)                                             | AT3G10500                | NAC domain containing protein 53 (NAC53)                            |
| AT4G18980               | Ats40-3 (Ats40-3)                                            | AT3G62770   | Protein required for autophagosome formation during nutrient deprivation and senescence | AT5G39610                | NAC domain containing protein 2 (NAC2)                              |
| AT3G62770               | Autophagy 18a (AtATG18A)                                     | AT5G64930   | Constitutive expression of pr genes 5 (CPR5)                                            | AT5G64930                | Constitutive expression of pr genes 5 (CPR5)                        |
| AT5G45900               | Autophagy 7 (APG7)                                           | AT2G39200   | MLO-like protein 12 (MLO12)                                                             |                          |                                                                     |
| AT1G11190               | Bifunctional nuclease i (BFN1)                               | AT5G39610   | NAC domain containing protein 2 (NAC2)                                                  |                          |                                                                     |
| AT5G64930               | Constitutive expression of pr genes 5 (CPR5)                 | AT3G10500   | NAC domain containing protein 53 (NAC053)                                               |                          |                                                                     |
| AT5G39610               | NAC domain containing protein 2 (NAC2)                       | AT3G11340   | UDP-glycosyltransferase-like protein                                                    |                          |                                                                     |
| AT3G29035               | NAC domain containing protein 3 (NAC3)                       | AT2G35980   | Late embryogenesis abundant hydroxyproline-rich glycoprotein (YLS9)                     |                          |                                                                     |



|                         |                                                                     |             |                                |                          |                                                  |
|-------------------------|---------------------------------------------------------------------|-------------|--------------------------------|--------------------------|--------------------------------------------------|
| AT2G43000               | NAC domain containing protein 42 (NAC42)                            |             |                                |                          |                                                  |
| AT3G10500               | NAC domain containing protein 53 (NAC53)                            |             |                                |                          |                                                  |
| AT5G13180               | NAC domain containing protein 83 (NAC83)                            |             |                                |                          |                                                  |
| AT1G69490               | NAC-like, activated by ap3/pi (NAP)                                 |             |                                |                          |                                                  |
| AT1G73220               | Organic cation/carnitine transporter1 (OCT1)                        |             |                                |                          |                                                  |
| AT5G13170               | Senescence-associated gene 29 (SAG29)                               |             |                                |                          |                                                  |
| AT5G51640               | Yellow-leaf-specific gene 7 (YLS7)                                  |             |                                |                          |                                                  |
| AT2G35980               | Late embryogenesis abundant hydroxyproline-rich glycoprotein (YLS9) |             |                                |                          |                                                  |
| <b>Defense response</b> |                                                                     |             |                                |                          |                                                  |
| <b>Leaves at 29 DAS</b> |                                                                     | <i>igr2</i> |                                | <b>Overlapping genes</b> |                                                  |
| AT1G25400               | Unknown protein                                                     | AT2G43620   | Chitinase-like protein         | AT5G64930                | Constitutive expression of PR genes 5 (CPR5)     |
| AT3G51130               | Unknown protein                                                     | AT3G28510   | AAA-type ATPase family protein | AT1G03850                | Glutaredoxin 13 (GRXS13)                         |
| AT1G13340               | Unknown protein                                                     | AT1G78410   | VQ motif-containing protein    | AT1G78410                | VQ motif-containing protein                      |
| AT1G74440               | Unknown protein                                                     | AT5G39580   | Peroxidase 62                  | AT4G02380                | Late embryogenesis abundant like protein (SAG21) |

|           |                                                      |           |                                                                         |           |                                                                                         |
|-----------|------------------------------------------------------|-----------|-------------------------------------------------------------------------|-----------|-----------------------------------------------------------------------------------------|
| AT3G51660 | Tautomerase/MIF superfamily protein                  | AT2G27660 | cysteine/histidine-rich domain-containing protein C1                    | AT1G27730 | cys2/His2-type zinc-finger protein                                                      |
| AT1G65820 | Microsomal glutathione s-transferase                 | AT1G13470 | Unknown protein                                                         | AT3G28510 | AAA-type ATPase family protein                                                          |
| AT3G28940 | AIG2-like (avirulence induced gene) family protein   | AT4G10500 | 2-oxoglutarate (2OG) and Fe(II)-dependent oxygenase superfamily protein | AT5G46050 | Peptide transporter 3 (PTR3)                                                            |
| AT4G38540 | FAD/NAD(P)-binding oxidoreductase family protein     | AT4G39830 | Putative L-ascorbate oxidase                                            | AT2G35980 | Late embryogenesis abundant hydroxyproline-rich glycoprotein (YLS9)                     |
| AT5G10190 | Major facilitator superfamily protein                | AT1G51790 | Leucine-rich repeat protein kinase family protein                       | AT3G23240 | Ethylene response factor 1 (ERF1)                                                       |
| AT5G62150 | Peptidoglycan-binding LysM domain-containing protein | AT5G64120 | Peroxidase 71                                                           | AT3G62770 | protein required for autophagosome formation during nutrient deprivation and senescence |
| AT4G18360 | Aldolase-type TIM barrel family protein              | AT5G51190 | Ethylene response factor 105 (ERF105)                                   | AT3G15500 | NAC domain containing protein 3 (NAC3)                                                  |
| AT3G09020 | Alpha 1,4-glycosyltransferase family protein         | AT3G48640 | Unknown protein                                                         | AT4G34410 | redox responsive transcription factor 1 (RRTF1)                                         |
| AT3G01830 | Calcium-binding EF-hand family protein               | AT4G23810 | WRKY transcription factor (WRKY53)                                      |           |                                                                                         |
| AT1G05575 | Unknown protein                                      | AT3G57240 | Beta-1,3-glucanase 3 (BG3)                                              |           |                                                                                         |
| AT3G47480 | Calcium-binding EF-hand family protein               | AT4G11890 | Protein kinase family protein                                           |           |                                                                                         |

|           |                                                  |           |                                                                                          |  |  |
|-----------|--------------------------------------------------|-----------|------------------------------------------------------------------------------------------|--|--|
| AT2G17740 | Cysteine/Histidine-rich C1 domain family protein | AT2G13810 | Agd2-like defense response protein 1 (ALD1)                                              |  |  |
| AT4G33940 | RING/U-box superfamily protein                   | AT3G62770 | Pprotein required for autophagosome formation during nutrient deprivation and senescence |  |  |
| AT1G23710 | Unknown function                                 | AT4G12470 | Azelaic acid induced 1 (AZI1)                                                            |  |  |
| AT1G19020 | Unknown protein                                  | AT2G46240 | Bcl-2-associated athanogene 6 (BAG6)                                                     |  |  |
| AT1G50740 | Transmembrane proteins 14C                       | AT5G20230 | Blue-copper-binding protein (SAG14)                                                      |  |  |
| AT1G15430 | Unknown protein                                  | AT5G64930 | Regulator of pathogenesis-related (PR) genes (HYS1)                                      |  |  |
| AT4G16260 | Glycosyl hydrolase superfamily protein           | AT4G23150 | Cysteine-rich receptor-like protein kinase 7 (CRK7)                                      |  |  |
| AT1G64610 | Transducin/WD40 repeat-like superfamily protein  | AT5G64905 | Elicitor peptide 3 precursor (PROPEP3)                                                   |  |  |
| AT1G31130 | Unknown protein                                  | AT3G23240 | Ethylene response factor 1 (ERF1)                                                        |  |  |
| AT3G13950 | Unknown protein                                  | AT4G17490 | Ethylene response factor subfamily B-3 of ERF/AP2 transcription factor family (ERF6)     |  |  |
| AT1G15010 | Unknown protein                                  | AT2G44840 | Ethylene-responsive transcription factor 13 (ERF13)                                      |  |  |
| AT5G05320 | FAD/NAD(P)-binding oxidoreductase family protein | AT1G19250 | Putative flavin-containing monooxygenase 1 (FMO1)                                        |  |  |
| AT3G60690 | SAUR-like auxin-responsive protein               | AT2G19190 | Flg22-induced receptor-like kinase 1 (FRK1)                                              |  |  |

|           |                                                                         |           |                                                |  |  |
|-----------|-------------------------------------------------------------------------|-----------|------------------------------------------------|--|--|
| AT3G28510 | AAA-type ATPase family protein                                          | AT1G03850 | Glutaredoxin 13 (GRXS13)                       |  |  |
| AT5G43570 | PR (pathogenesis-related) peptide                                       | AT1G02930 | Glutathione transferase                        |  |  |
| AT4G27450 | Unknown protein                                                         | AT1G73260 | Kunitz trypsin inhibitor 1 (1KTIL)             |  |  |
| AT2G32030 | Acyl-CoA N-acyltransferases (NAT) superfamily protein                   | AT2G39200 | MLO-like protein 12 (MLO12)                    |  |  |
| AT5G66070 | RING/U-box superfamily protein                                          | AT5G14180 | Triacylglycerol lipase 2 (MPL1)                |  |  |
| AT2G14080 | Disease resistance protein (TIR-NBS-LRR class) family                   | AT3G15500 | NAC domain containing protein 3 (NAC3)         |  |  |
| AT4G25900 | Galactose mutarotase-like superfamily protein                           | AT2G14610 | Pathogenesis-related gene 1 (PR1)              |  |  |
| AT4G00700 | C2 calcium/lipid-binding plant phosphoribosyltransferase family protein | AT1G04980 | Disulfide isomerase-like protein (PDI10)       |  |  |
| AT3G53600 | C2H2-type zinc finger family protein                                    | AT5G46050 | Peptide transporter 3 (PTR3)                   |  |  |
| AT4G19925 | Toll-Interleukin-Resistance (TIR) domain family protein                 | AT5G44420 | Plant defensin 1.2 (PDF1.2)                    |  |  |
| AT2G15170 | Plant basic secretory protein (BSP) family protein                      | AT3G23010 | Receptor like protein 36 (RLP36)               |  |  |
| AT4G26120 | Ankyrin repeat family protein / BTB/POZ domain-containing protein       | AT4G34410 | Redox responsive transcription factor 1 (MTF1) |  |  |
| AT1G25275 | unknown protein                                                         | AT1G27730 | Cys2/His2-type zinc-finger protein             |  |  |

|           |                                                                           |           |                                                                     |  |  |
|-----------|---------------------------------------------------------------------------|-----------|---------------------------------------------------------------------|--|--|
| AT1G03150 | Acyl-CoA N-acyltransferases (NAT) superfamily protein                     | AT4G02380 | Late embryogenesis abundant like protein (SAG21)                    |  |  |
| AT3G45040 | Putative dolichol kinase.                                                 | AT2G03760 | Flavonol sulfotransferase-like protein (SOT12)                      |  |  |
| AT3G52800 | A20/AN1-like zinc finger family protein                                   | AT2G24850 | Tyrosine aminotransferase 3 (TAT3)                                  |  |  |
| AT1G78410 | VQ motif-containing protein                                               | AT3G11340 | UDP-glycosyltransferase-like protein                                |  |  |
| AT2G27310 | F-box family protein                                                      | AT5G50200 | Nitrate transmembrane transporter (WR3)                             |  |  |
| AT5G18130 | Unknown protein                                                           | AT5G22570 | WRKY transcription factor 38 (WRKY38)                               |  |  |
| AT1G76600 | Unknown protein                                                           | AT5G26170 | WRKY transcription factor 50 (WRKY50)                               |  |  |
| AT4G39670 | Glycolipid transfer protein (GLTP) family protein                         | AT5G01900 | Putative WRKY transcription factor 62 (WRKY62)                      |  |  |
| AT1G65690 | Late embryogenesis abundant (LEA) hydroxyproline-rich glycoprotein family | AT2G35980 | Late embryogenesis abundant hydroxyproline-rich glycoprotein (YLS9) |  |  |
| AT3G17410 | Protein kinase superfamily protein                                        |           |                                                                     |  |  |
| AT2G32140 | Transmembrane receptors                                                   |           |                                                                     |  |  |
| AT4G11170 | Disease resistance protein (TIR-NBS-LRR class) family                     |           |                                                                     |  |  |
| AT2G37130 | Peroxidase superfamily protein                                            |           |                                                                     |  |  |
| AT1G76070 | Unknown protein                                                           |           |                                                                     |  |  |

|           |                                                                  |  |  |  |  |
|-----------|------------------------------------------------------------------|--|--|--|--|
| AT3G48760 | DHHC-type zinc finger family protein                             |  |  |  |  |
| AT2G30020 | AP2C1                                                            |  |  |  |  |
| AT3G10800 | Putative membrane-tethered transcriptional factor(BZIP28)        |  |  |  |  |
| AT2G40140 | CZF1                                                             |  |  |  |  |
| AT3G01420 | Alpha-dioxygenase (CZF1)                                         |  |  |  |  |
| AT1G28480 | Glutaredoxin (GRX480)                                            |  |  |  |  |
| AT5G02490 | Heat shock protein 70 (Hsp 70) family protein(Hsp70-2)           |  |  |  |  |
| AT1G32130 | (IWS1)                                                           |  |  |  |  |
| AT2G02120 | PR (pathogenesis-related) protein(PDF2.1)                        |  |  |  |  |
| AT4G19700 | BOI (Botrytis Susceptible 1 Interactor) (RING)                   |  |  |  |  |
| AT3G10640 | (VPS60.1)                                                        |  |  |  |  |
| AT5G57220 | Cytochrome p450, family 81, subfamily f, polypeptide 2 (CYP81f2) |  |  |  |  |
| AT4G26080 | ABA insensitive 1 (ABI1)                                         |  |  |  |  |
| AT3G44880 | Accelerated cell death 1 (ACD1)                                  |  |  |  |  |
| AT2G34690 | Accelerated cell death 11 (ACD11)                                |  |  |  |  |
| AT2G26400 | Acireductone dioxygenase 3 (ARD3)                                |  |  |  |  |

|           |                                                                                         |  |  |  |  |
|-----------|-----------------------------------------------------------------------------------------|--|--|--|--|
| AT1G33560 | Activated disease resistance 1 (ADR1)                                                   |  |  |  |  |
| AT3G48990 | Acyl-activating enzyme 3 (AAE3)                                                         |  |  |  |  |
| AT5G04720 | Adr1-like 2 (ADR1-l2)                                                                   |  |  |  |  |
| AT3G62770 | Protein required for autophagosome formation during nutrient deprivation and senescence |  |  |  |  |
| AT3G61710 | Autophagy 6 (ATG6)                                                                      |  |  |  |  |
| AT5G45900 | Autophagy 7 (APG7)                                                                      |  |  |  |  |
| AT4G21980 | Autophagy 8a (APG8a)                                                                    |  |  |  |  |
| AT5G13320 | Avrpphb susceptible 3 (PBS3)                                                            |  |  |  |  |
| AT1G42990 | Basic region/leucine zipper motif 60 (bZIP60)                                           |  |  |  |  |
| AT5G47120 | Bax inhibitor 1 (BI1)                                                                   |  |  |  |  |
| AT5G41410 | Bell 1 (BEL1)                                                                           |  |  |  |  |
| AT5G42380 | Calmodulin like 37 (CML37)                                                              |  |  |  |  |
| AT5G26920 | CAM-binding protein 60-like g (CBP60g)                                                  |  |  |  |  |
| AT5G27420 | Carbon/nitrogen insensitive 1 (CNIL)                                                    |  |  |  |  |
| AT5G25110 | Cbl-interacting protein kinase 25 (CIPK25)                                              |  |  |  |  |
| AT1G20440 | Cold-regulated 47 (COR47)                                                               |  |  |  |  |

|           |                                                             |  |  |  |  |
|-----------|-------------------------------------------------------------|--|--|--|--|
| AT5G64930 | Regulator of pathogenesis-related (PR) genes (HYS1)         |  |  |  |  |
| AT3G50260 | Cooperatively regulated by ethylene and jasmonate 1 (CEJ1)  |  |  |  |  |
| AT4G01010 | Cyclic nucleotide-gated channel 13 (CNJC13)                 |  |  |  |  |
| AT1G70530 | Cysteine-rich rlk (receptor-like protein kinase) 3 (CRK3)   |  |  |  |  |
| AT4G04490 | Cysteine-rich rlk (receptor-like protein kinase) 36 (CRK36) |  |  |  |  |
| AT4G04500 | Cysteine-rich rlk (receptor-like protein kinase) 37 (CRK37) |  |  |  |  |
| AT4G00550 | Digalactosyl diacylglycerol deficient 2 (DGD2)              |  |  |  |  |
| AT3G62800 | Double-stranded-rna-binding protein 4 (DRB4)                |  |  |  |  |
| AT3G60190 | Dynammin-like 1e (DL1E)                                     |  |  |  |  |
| AT1G28370 | Erf domain protein 11 (ERF11)                               |  |  |  |  |
| AT3G23240 | Ethylene response factor 1 (ERF1)                           |  |  |  |  |
| AT5G61600 | Ethylene response factor 104 (ERF104)                       |  |  |  |  |
| AT4G17500 | Ethylene responsive element binding factor 1 (ERF-1)        |  |  |  |  |



|           |                                                     |  |  |  |  |
|-----------|-----------------------------------------------------|--|--|--|--|
| AT5G47220 | Ethylene responsive element binding factor 2 (ERF2) |  |  |  |  |
| AT3G15210 | Ethylene responsive element binding factor 4 (ERF4) |  |  |  |  |
| AT3G20770 | Ethylene-insensitive3 (EIN3)                        |  |  |  |  |
| AT1G73730 | Ethylene-insensitive3-like 3 (EIL3)                 |  |  |  |  |
| AT5G09440 | Exordium like 4 (EXL4)                              |  |  |  |  |
| AT1G12200 | Flavin monooxygenase (FMO)                          |  |  |  |  |
| AT3G63010 | GA insensitive dwarf1b (GID1B)                      |  |  |  |  |
| AT1G09560 | Germin-like protein 5 (GLP5)                        |  |  |  |  |
| AT1G03850 | Glutaredoxin 13 (GRXS13)                            |  |  |  |  |
| AT2G47730 | Glutathione s-transferase phi 8 (GSTF8)             |  |  |  |  |
| AT3G57550 | Guanylate kinase (AGK2)                             |  |  |  |  |
| AT5G62020 | Heat shock transcription factor b2a (HSFB2A)        |  |  |  |  |
| AT1G70690 | Hopw1-1-induced gene1 (HWI1)                        |  |  |  |  |
| AT1G55110 | Indeterminate(id)-domain 7 (IDD7)                   |  |  |  |  |
| AT1G01470 | Late embryogenesis abundant 14 (LEA14)              |  |  |  |  |
| AT5G01540 | Lectin receptor kinase a4.1 (LECEKa4.1)             |  |  |  |  |

|           |                                                            |  |  |  |  |
|-----------|------------------------------------------------------------|--|--|--|--|
| AT4G20380 | Lesion simulating disease (LSD1)                           |  |  |  |  |
| AT3G50970 | Low temperature-induced 30 (LTI30)                         |  |  |  |  |
| AT1G01560 | MAP kinase 11 (MPK11)                                      |  |  |  |  |
| AT3G21220 | MAP kinase kinase 5 (MKK5)                                 |  |  |  |  |
| AT2G15890 | Maternal effect embryo arrest 14 (MEE14)                   |  |  |  |  |
| AT3G48890 | Membrane-associated progesterone binding protein 3 (MAPR3) |  |  |  |  |
| AT1G10210 | Mitogen-activated protein kinase 1 (MPK1)                  |  |  |  |  |
| AT1G51660 | Mitogen-activated protein kinase kinase 4 (MKK4)           |  |  |  |  |
| AT2G42620 | More axillary branches 2 (MAX2)                            |  |  |  |  |
| AT3G06490 | Myb domain protein 108 (MYB108)                            |  |  |  |  |
| AT3G15500 | NAC domain-containing protein 55 (NAC3)                    |  |  |  |  |
| AT2G43000 | NAC domain containing protein 42 (NAC42)                   |  |  |  |  |
| AT3G49530 | NAC domain containing protein 22 (NAC22)                   |  |  |  |  |

|           |                                                             |  |  |  |  |
|-----------|-------------------------------------------------------------|--|--|--|--|
| AT1G69490 | NAC-like, activated by ap3/pi (NAP)                         |  |  |  |  |
| AT3G11660 | NDR1/hin1-like 1 (NHL1)                                     |  |  |  |  |
| AT3G11650 | NDR1/hin1-like 2 (NHL2)                                     |  |  |  |  |
| AT5G06320 | NDR1/hin1-like 3 (NHL3)                                     |  |  |  |  |
| AT1G02860 | Nitrogen limitation adaptation (NLA)                        |  |  |  |  |
| AT5G06960 | Ocs-element binding factor 5 (OBF5)                         |  |  |  |  |
| AT5G46180 | Ornithine-delta-aminotransferase (Delta-OAT)                |  |  |  |  |
| AT2G40000 | Ortholog of sugar beet hs1 pro-1 2 (HSPRO2)                 |  |  |  |  |
| AT5G59420 | OSBP(oxysterol binding protein)-related protein 3c (ORP3C)  |  |  |  |  |
| AT3G04720 | Pathogenesis-related 4 (PR4)                                |  |  |  |  |
| AT5G46050 | Peptide transporter 3 (PTR3)                                |  |  |  |  |
| AT5G06720 | Peroxidase 2 (PA2)                                          |  |  |  |  |
| AT1G01820 | Peroxin 11c (PEX11C)                                        |  |  |  |  |
| AT2G26560 | Phospholipase a 2a (PLA2a)                                  |  |  |  |  |
| AT2G42010 | Phospholipase d beta 1 (PLD beta1)                          |  |  |  |  |
| AT4G20260 | Plasma-membrane associated cation-binding protein 1 (PCAP1) |  |  |  |  |

|           |                                                        |  |  |  |  |
|-----------|--------------------------------------------------------|--|--|--|--|
| AT4G18430 | Rab gtpase homolog a1e (RAB a1e)                       |  |  |  |  |
| AT2G32660 | Receptor like protein 22 (RLP22)                       |  |  |  |  |
| AT3G05360 | Receptor like protein 30 (RLP30)                       |  |  |  |  |
| AT1G47890 | Receptor like protein 7 (RLP7)                         |  |  |  |  |
| AT1G69270 | Receptor-like protein kinase 1 (RPK1)                  |  |  |  |  |
| AT4G34410 | Redox responsive transcription factor 1 (RRTF1)        |  |  |  |  |
| AT3G46620 | Ring and domain of unknown function 1117 1 (RDUF1)     |  |  |  |  |
| AT5G63970 | Ring domain ligase 3 (RGLG3)                           |  |  |  |  |
| AT1G27730 | Cys2/His2-type zinc-finger protein                     |  |  |  |  |
| AT4G02380 | Late embryogenesis abundant like protein (SAG21)       |  |  |  |  |
| AT1G15310 | Signal recognition particle 54 kda subunit (ATHSRP54A) |  |  |  |  |
| AT3G52400 | Syntaxin of plants 122 (SYP122)                        |  |  |  |  |
| AT2G23810 | Tetraspanin8 (TET8)                                    |  |  |  |  |
| AT3G12250 | Tgacg motif-binding factor 6 (TGA6)                    |  |  |  |  |
| AT1G45145 | Thioredoxin h-type 5 (TRX5)                            |  |  |  |  |

|                                                  |                                                                     |             |  |                          |  |
|--------------------------------------------------|---------------------------------------------------------------------|-------------|--|--------------------------|--|
| AT5G37770                                        | Touch 2 (TCH2)                                                      |             |  |                          |  |
| AT3G16720                                        | Toxicos en levadura 2 (AT12)                                        |             |  |                          |  |
| AT2G30140                                        | UDP-glucosyl transferase 87a2 (UGT87a2)                             |             |  |                          |  |
| AT5G43580                                        | Unusual serine protease inhibitor (UPI)                             |             |  |                          |  |
| AT2G23320                                        | WRKY transcription factor 15 (WRKY15)                               |             |  |                          |  |
| AT2G30250                                        | WRKY transcription factor 25 (WRKY25)                               |             |  |                          |  |
| AT2G38470                                        | WRKY transcription factor 33 (WRKY33)                               |             |  |                          |  |
| AT5G49520                                        | WRKY transcription factor 48 (WRKY48)                               |             |  |                          |  |
| AT5G64810                                        | WRKY transcription factor 51 (WRKY51)                               |             |  |                          |  |
| AT2G35980                                        | Late embryogenesis abundant hydroxyproline-rich glycoprotein (YLS9) |             |  |                          |  |
| AT1G05300                                        | Zinc transporter 5 precursor (ZIP5)                                 |             |  |                          |  |
| AT3G19580                                        | Zinc-finger protein 2 (ZF2)                                         |             |  |                          |  |
| <b>Salicylic acid mediated signaling pathway</b> |                                                                     |             |  |                          |  |
| <b>Leaves at 29 DAS</b>                          |                                                                     | <i>igr2</i> |  | <b>Overlapping genes</b> |  |

|           |                                                                          |           |                                                                      |           |                                                                          |
|-----------|--------------------------------------------------------------------------|-----------|----------------------------------------------------------------------|-----------|--------------------------------------------------------------------------|
| AT3G60690 | SAUR-like auxin-responsive protein family                                | AT3G28510 | AAA-type ATPase family protein                                       | AT3G28510 | P-loop containing nucleoside triphosphate hydrolases superfamily protein |
| AT3G28510 | P-loop containing nucleoside triphosphate hydrolases superfamily protein | AT5G64120 | Peroxidase                                                           | AT2G35980 | Late embryogenesis abundant hydroxyproline-rich glycoprotein (YLS9)      |
| AT1G25400 | Unknown protein                                                          | AT1G78410 | VQ motif-containing protein                                          | AT1G78410 | VQ motif-containing protein                                              |
| AT1G13340 | Unknown protein                                                          | AT3G48640 | Unknown protein                                                      | AT3G28210 | Zinc finger AN1 domain-containing stress-associated protein 12 (PMZ)     |
| AT3G22160 | VQ motif-containing protein                                              | AT1G13470 | Unknown protein                                                      | AT3G15500 | NAC domain containing protein 3 (NAC3)                                   |
| AT4G27450 | Unknown protein                                                          | AT3G28210 | Zinc finger AN1 domain-containing stress-associated protein 12 (PMZ) |           |                                                                          |
| AT1G28190 | Unknown protein                                                          | AT4G23810 | WRKY transcription factor(WRKY53)                                    |           |                                                                          |
| AT4G26120 | Ankyrin repeat family protein / BTB/POZ domain-containing protein        | AT3G57240 | Beta-1,3-glucanase 3 (BG3)                                           |           |                                                                          |
| AT3G09020 | Alpha 1,4-glycosyltransferase family protein                             | AT4G11890 | Protein kinase family protein                                        |           |                                                                          |
| AT3G45040 | Putative dolichol kinase.                                                | AT2G13810 | Agd2-like defense response protein 1 (ALD1)                          |           |                                                                          |
| AT2G27500 | Glycosyl hydrolase superfamily protein                                   | AT4G12470 | Azelaic acid induced 1 (ZAI1)                                        |           |                                                                          |

|           |                                                    |           |                                                                     |  |  |
|-----------|----------------------------------------------------|-----------|---------------------------------------------------------------------|--|--|
| AT3G01830 | Calcium-binding EF-hand family protein             | AT2G44840 | ethylene-responsive transcription factor 13 (ERF13)                 |  |  |
| AT3G47480 | Calcium-binding EF-hand family protein             | AT2G19190 | Flg22-induced receptor-like kinase 1 (FRK1)                         |  |  |
| AT1G78410 | VQ motif-containing protein                        | AT3G15500 | NAC domain containing protein 3 (NAC3)                              |  |  |
| AT1G19020 | Unknown protein                                    | AT2G14610 | Pathogenesis-related gene 1 (PR1)                                   |  |  |
| AT4G13820 | Leucine-rich repeat (LRR) family protein           | AT3G26830 | Cytochrome P450 71B15 (PAD3)                                        |  |  |
| AT4G25390 | Protein kinase superfamily protein                 | AT4G02380 | Late embryogenesis abundant like protein (SAG21)                    |  |  |
| AT1G15430 | Unknown protein                                    | AT2G03760 | Flavonol sulfotransferase-like protein (SOT12)                      |  |  |
| AT4G39670 | Glycolipid transfer protein (GLTP) family protein  | AT5G22570 | WRKY transcription factor 38 (WRKY38)                               |  |  |
| AT3G17410 | Protein kinase superfamily protein                 | AT5G01900 | Putative WRKY transcription factor 62 (WRKY62)                      |  |  |
| AT1G64610 | Transducin/WD40 repeat-like superfamily protein    | AT2G35980 | Late embryogenesis abundant hydroxyproline-rich glycoprotein (YLS9) |  |  |
| AT3G13950 | Unknown protein                                    |           |                                                                     |  |  |
| AT3G48760 | DHHC-type zinc finger family protein               |           |                                                                     |  |  |
| AT5G38710 | Methylenetetrahydrofolate reductase family protein |           |                                                                     |  |  |
| AT2G26530 | Unknown protein                                    |           |                                                                     |  |  |

|           |                                                                      |  |  |  |  |
|-----------|----------------------------------------------------------------------|--|--|--|--|
| AT3G10800 | Putative membrane-tethered transcriptional factor(BZIP28)            |  |  |  |  |
| AT2G40140 | (CZF1)                                                               |  |  |  |  |
| AT1G28480 | Glutaredoxin(GRX480)                                                 |  |  |  |  |
| AT3G28210 | Zinc finger AN1 domain-containing stress-associated protein 12 (PMZ) |  |  |  |  |
| AT1G22400 | (UGT85A1)                                                            |  |  |  |  |
| AT3G10640 | (VPS60.1)                                                            |  |  |  |  |
| AT4G26080 | ABA insensitive 1 (ABI1)                                             |  |  |  |  |
| AT2G26400 | Acireductone dioxygenase 3 (ARD3)                                    |  |  |  |  |
| AT5G13320 | Avrpphb susceptible 3 (PBS3)                                         |  |  |  |  |
| AT1G42990 | Basic region/leucine zipper motif 60 (bZIP60)                        |  |  |  |  |
| AT5G47120 | Bax inhibitor 1 (BI1)                                                |  |  |  |  |
| AT5G41410 | Bell 1 (BEL1)                                                        |  |  |  |  |
| AT5G26920 | CAM-binding protein 60-like g (CBP60g)                               |  |  |  |  |
| AT4G01010 | Cyclic nucleotide-gated channel 13 (CNGC13)                          |  |  |  |  |
| AT4G04490 | Cysteine-rich rlk (receptor-like protein kinase) 36 (CRK36)          |  |  |  |  |
| AT4G00550 | Digalactosyl diacylglycerol deficient 2 (DGD2)                       |  |  |  |  |



|           |                                                  |  |  |  |  |
|-----------|--------------------------------------------------|--|--|--|--|
| AT3G60190 | Dynammin-like 1e (DL1e)                          |  |  |  |  |
| AT1G28370 | Erf domain protein 11 (ERF11)                    |  |  |  |  |
| AT3G20770 | Ethylene-insensitive3 (EIN3)                     |  |  |  |  |
| AT1G73730 | Ethylene-insensitive3-like 3 (EIL3)              |  |  |  |  |
| AT2G26300 | G protein alpha subunit 1 (GP alpha 1)           |  |  |  |  |
| AT3G63010 | GA insensitive dwarf1b (GID1B)                   |  |  |  |  |
| AT5G27320 | GA insensitive dwarf1c (GID1C)                   |  |  |  |  |
| AT5G13190 | GSH-induced litaf domain protein (GILP)          |  |  |  |  |
| AT5G01540 | Lectin receptor kinase a4.1 (LECRKa4.1)          |  |  |  |  |
| AT4G20380 | Lesion simulating disease (LSD1)                 |  |  |  |  |
| AT1G01560 | MAP kinase 11 (MPK11)                            |  |  |  |  |
| AT1G10210 | Mitogen-activated protein kinase 1 (MPK1)        |  |  |  |  |
| AT1G51660 | Mitogen-activated protein kinase kinase 4 (MKK4) |  |  |  |  |
| AT3G15500 | NAC domain containing protein 3 (NAC3)           |  |  |  |  |
| AT5G06960 | Ocs-element binding factor 5 (OBF5)              |  |  |  |  |

|                                            |                                                                     |  |  |  |  |
|--------------------------------------------|---------------------------------------------------------------------|--|--|--|--|
| AT5G59420                                  | Osbp(oxysterol binding protein)-related protein 3c (ORP3C)          |  |  |  |  |
| AT2G26560                                  | Phospholipase a 2a (PLA2A)                                          |  |  |  |  |
| AT3G05360                                  | Receptor like protein 30 (RLP30)                                    |  |  |  |  |
| AT1G69270                                  | Receptor-like protein kinase 1 (RPK1)                               |  |  |  |  |
| AT4G02380                                  | late embryogenesis abundant like protein (SAG21)                    |  |  |  |  |
| AT4G24210                                  | Sleepy1 (SLY1)                                                      |  |  |  |  |
| AT3G52400                                  | Syntaxin of plants 122 (SYP122)                                     |  |  |  |  |
| AT3G12250                                  | Tgacg motif-binding factor 6 (TGA6)                                 |  |  |  |  |
| AT3G16720                                  | Toxicos en levadura 2 (ATL2)                                        |  |  |  |  |
| AT4G29380                                  | Vacuolar protein sorting 15 (VPS15)                                 |  |  |  |  |
| AT2G30250                                  | WRKY transcription factor 25 (WRKY25)                               |  |  |  |  |
| AT2G38470                                  | WRKY transcription factor 33 (WRKY33)                               |  |  |  |  |
| AT2G35980                                  | late embryogenesis abundant hydroxyproline-rich glycoprotein (YLS9) |  |  |  |  |
| <b>Response to salicylic acid stimulus</b> |                                                                     |  |  |  |  |

| Leaves at 29 DAS |                                                                   | <i>igr2</i> |                                                                      | Overlapping genes |                                                                           |
|------------------|-------------------------------------------------------------------|-------------|----------------------------------------------------------------------|-------------------|---------------------------------------------------------------------------|
| AT3G60690        | SAUR-like auxin-responsive protein family                         | AT3G28510   | AAA-type ATPase family protein                                       | AT5G24110         | WRKY transcription factor 30 (WRKY30)                                     |
| AT3G28510        | AAA-type ATPase family protein                                    | AT5G64120   | Peroxidase                                                           | AT3G28510         | P-loop containing nucleoside triphosphate hydrolases superfamily protein. |
| AT1G25400        | Unknown protein                                                   | AT1G78410   | VQ motif-containing protein                                          | AT5G46050         | Peptide transporter 3 (PT3)                                               |
| AT1G13340        | Unknown protein                                                   | AT3G48640   | Unknown protein                                                      | AT2G35980         | Yellow-leaf-specific gene 9 (YLS9)                                        |
| AT3G22160        | VQ motif-containing protein                                       | AT1G13470   | Unknown protein                                                      | AT1G78410         | VQ motif-containing protein                                               |
| AT4G27450        | Aluminium induced protein with YGL and LRDR motifs                | AT3G28210   | zinc finger AN1 domain-containing stress-associated protein 12 (PMZ) | AT4G02380         | late embryogenesis abundant like protein (SAG21)                          |
| AT1G28190        | unknown protein                                                   | AT4G23810   | WRKY transcription factor (WRKY53)                                   | AT3G28210         | zinc finger AN1 domain-containing stress-associated protein 12 (PMZ)      |
| AT4G26120        | Ankyrin repeat family protein / BTB/POZ domain-containing protein | AT3G57240   | Beta-1,3-glucanase 3 (BG3)                                           | AT3G15500         | NAC domain containing protein 3 (NAC3)                                    |
| AT3G09020        | Alpha 1,4-glycosyltransferase family protein                      | AT4G11890   | protein kinase family protein                                        |                   |                                                                           |
| AT3G45040        | Putative dolichol kinase                                          | AT2G13810   | AGD2-like defense response protein 1 (ALD1)                          |                   |                                                                           |
| AT2G27500        | Glycosyl hydrolase superfamily protein                            | AT4G12470   | Azelaic acid induced 1 (AZI1)                                        |                   |                                                                           |

|           |                                                   |           |                                                       |  |  |
|-----------|---------------------------------------------------|-----------|-------------------------------------------------------|--|--|
| AT3G01830 | Calcium-binding EF-hand family protein            | AT5G63160 | Btb and taz domain protein 1 (BT1)                    |  |  |
| AT3G47480 | Calcium-binding EF-hand family protein            | AT3G48360 | Btb and taz domain protein 2 (BT2)                    |  |  |
| AT5G52660 | Homeodomain-like superfamily protein              | AT2G44840 | Ethylene-responsive element binding factor 13 (ERF13) |  |  |
| AT1G74840 | Homeodomain-like superfamily protein              | AT2G19190 | Flg22-induced receptor-like kinase 1 (FRK1)           |  |  |
| AT1G78410 | VQ motif-containing protein                       | AT1G73260 | Kunitz trypsin inhibitor 1 (KTI1)                     |  |  |
| AT1G19020 | Unknown protein                                   | AT4G37260 | Myb domain protein 73 (MYB73)                         |  |  |
| AT4G13820 | Leucine-rich repeat (LRR) family protein          | AT3G50060 | Myb domain protein 77 (MYB77)                         |  |  |
| AT4G25390 | Protein kinase superfamily protein                | AT3G15500 | NAC domain containing protein 3 (NAC3)                |  |  |
| AT1G15430 | Unknown protein                                   | AT2G14610 | Pathogenesis-related gene 1 (PR1)                     |  |  |
| AT3G17410 | Protein kinase superfamily protein                | AT5G46050 | Peptide transporter 3 (PTR3)                          |  |  |
| AT4G39670 | Glycolipid transfer protein (GLTP) family protein | AT3G26830 | cytochrome P450 71B15 (PAD3)                          |  |  |
| AT4G01280 | Homeodomain-like superfamily protein              | AT4G02380 | late embryogenesis abundant like protein (SAG21)      |  |  |
| AT1G64610 | Transducin/WD40 repeat-like superfamily protein   | AT2G03760 | flavonol sulfotransferase-like protein (SOT12)        |  |  |
| AT3G13950 | Unknown protein                                   | AT5G24110 | WRKY transcription factor 30 (WRKY30)                 |  |  |

|           |                                                                      |           |                                                                     |  |  |
|-----------|----------------------------------------------------------------------|-----------|---------------------------------------------------------------------|--|--|
| AT3G48760 | DHHC-type zinc finger family protein                                 | AT5G22570 | WRKY transcription factor 38 (WRKY38)                               |  |  |
| AT5G38710 | Methylenetetrahydrofolate reductase family protein                   | AT5G01900 | WRKY transcription factor 62 (WRKY62)                               |  |  |
| AT2G26530 | Unknown function                                                     | AT2G35980 | late embryogenesis abundant hydroxyproline-rich glycoprotein (YLS9) |  |  |
| AT3G10800 | Putative membrane-tethered transcriptional factor(BZIP28)            |           |                                                                     |  |  |
| AT2G40140 | (CZF1)                                                               |           |                                                                     |  |  |
| AT3G01420 | Alpha-dioxygenase(DOX1)                                              |           |                                                                     |  |  |
| AT1G28480 | Glutaredoxin(GRX480)                                                 |           |                                                                     |  |  |
| AT3G28210 | zinc finger AN1 domain-containing stress-associated protein 12 (PMZ) |           |                                                                     |  |  |
| AT1G22400 | (UGT85A1)                                                            |           |                                                                     |  |  |
| AT3G10640 | (VPS60.1)                                                            |           |                                                                     |  |  |
| AT2G34720 | Nuclear factor y, subunit a4 (NF-YA4)                                |           |                                                                     |  |  |
| AT4G26080 | ABA insensitive 1 (ABI1)                                             |           |                                                                     |  |  |
| AT2G34690 | Accelerated cell death 11 (ACD11)                                    |           |                                                                     |  |  |
| AT2G26400 | Acireductone dioxygenase 3 (ARD3)                                    |           |                                                                     |  |  |
| AT5G13320 | Avrpphb susceptible 3 (PBS3)                                         |           |                                                                     |  |  |

|           |                                                             |  |  |  |  |
|-----------|-------------------------------------------------------------|--|--|--|--|
| AT1G42990 | Basic region/leucine zipper motif 60 (bZIP60)               |  |  |  |  |
| AT5G47120 | Bax inhibitor 1 (BI1)                                       |  |  |  |  |
| AT5G41410 | Bell 1 (BEL1)                                               |  |  |  |  |
| AT3G61190 | Bon association protein 1 (BAP1)                            |  |  |  |  |
| AT5G26920 | CAM-binding protein 60-like g (CBP60g)                      |  |  |  |  |
| AT4G01010 | Cyclic nucleotide-gated channel 13 (CNGC13)                 |  |  |  |  |
| AT4G04490 | Cysteine-rich rlk (receptor-like protein kinase) 36 (CRK36) |  |  |  |  |
| AT4G00550 | Digalactosyl diacylglycerol deficient 2 (DGD2)              |  |  |  |  |
| AT3G60190 | Dynamamin-like 1e (DL1e)                                    |  |  |  |  |
| AT1G28370 | Erf domain protein 11 (ERF11)                               |  |  |  |  |
| AT3G20770 | Ethylene-insensitive3 (EIN3)                                |  |  |  |  |
| AT1G73730 | Ethylene-insensitive3-like 3 (EIL3)                         |  |  |  |  |
| AT2G26300 | G protein alpha subunit 1 (GP alpha 1)                      |  |  |  |  |
| AT3G63010 | GA insensitive dwarf1b (GID1b)                              |  |  |  |  |
| AT5G27320 | GA insensitive dwarf1c (G1c)                                |  |  |  |  |
| AT5G13190 | GSH-induced litaf domain protein (GILP)                     |  |  |  |  |

|           |                                                  |  |  |  |  |
|-----------|--------------------------------------------------|--|--|--|--|
| AT5G01540 | Lectin receptor kinase a4.1 (LECRKa4.1)          |  |  |  |  |
| AT4G20380 | Lesion simulating disease (LSD1)                 |  |  |  |  |
| AT1G01560 | MAP kinase 11 (MPK11)                            |  |  |  |  |
| AT1G10210 | Mitogen-activated protein kinase 1 (MPK1)        |  |  |  |  |
| AT1G51660 | Mitogen-activated protein kinase kinase 4 (MKK4) |  |  |  |  |
| AT1G48000 | Myb domain protein 112 (MYB112)                  |  |  |  |  |
| AT1G06180 | Myb domain protein 13 (MYB13)                    |  |  |  |  |
| AT2G47190 | Myb domain protein 2 (MYB2)                      |  |  |  |  |
| AT1G22640 | Myb domain protein 3 (MYB3)                      |  |  |  |  |
| AT5G59780 | Myb domain protein 59 (MYB59)                    |  |  |  |  |
| AT3G11440 | Myb domain protein 65 (MYB65)                    |  |  |  |  |
| AT2G16720 | Myb domain protein 7 (MYB7)                      |  |  |  |  |
| AT1G71030 | Myb-like 2 (MYB12)                               |  |  |  |  |
| AT3G15500 | NAC domain containing protein 3 (NAC3)           |  |  |  |  |
| AT1G02860 | Nitrogen limitation adaptation (NLA)             |  |  |  |  |

|           |                                                            |  |  |  |  |
|-----------|------------------------------------------------------------|--|--|--|--|
| AT5G06960 | Ocs-element binding factor 5 (OBF5)                        |  |  |  |  |
| AT2G40000 | Ortholog of sugar beet hs1 pro-1 2 (HSPRO2)                |  |  |  |  |
| AT5G59420 | Osbp(oxysterol binding protein)-related protein 3c (ORP3c) |  |  |  |  |
| AT5G46050 | Peptide transporter 3 (PT3)                                |  |  |  |  |
| AT2G26560 | Phospholipase a 2a (PLA2a)                                 |  |  |  |  |
| AT3G05360 | Receptor like protein 30 (RLP30)                           |  |  |  |  |
| AT1G69270 | Receptor-like protein kinase 1 (RPK1)                      |  |  |  |  |
| AT5G13330 | Related to ap2 6l (RAP2.6l)                                |  |  |  |  |
| AT4G02380 | late embryogenesis abundant like protein (SAG21)           |  |  |  |  |
| AT5G13170 | Senescence-associated gene 29 (SAG29)                      |  |  |  |  |
| AT4G24210 | Sleepy1 (SLY1)                                             |  |  |  |  |
| AT3G52400 | Syntaxin of plants 122 (SYP122)                            |  |  |  |  |
| AT3G12250 | TGACG motif-binding factor 6 (TGA6)                        |  |  |  |  |
| AT3G16720 | Toxicos en levadura 2 (AT12)                               |  |  |  |  |
| AT4G29380 | Vacuolar protein sorting 15 (VPS15)                        |  |  |  |  |



|                                                 |                                                                     |             |                                                                      |                          |                                                                      |
|-------------------------------------------------|---------------------------------------------------------------------|-------------|----------------------------------------------------------------------|--------------------------|----------------------------------------------------------------------|
| AT2G30250                                       | WRKY transcription factor 25 (WRKY25)                               |             |                                                                      |                          |                                                                      |
| AT5G24110                                       | WRKY transcription factor 30 (WRKY30)                               |             |                                                                      |                          |                                                                      |
| AT2G38470                                       | WRKY transcription factor 33 (WRKY33)                               |             |                                                                      |                          |                                                                      |
| AT2G35980                                       | late embryogenesis abundant hydroxyproline-rich glycoprotein (YLS9) |             |                                                                      |                          |                                                                      |
| <b>Jasmonic acid mediated signaling pathway</b> |                                                                     |             |                                                                      |                          |                                                                      |
| <b>Leaves at 29 DAS</b>                         |                                                                     | <i>igr2</i> |                                                                      | <b>Overlapping genes</b> |                                                                      |
| AT3G47480                                       | Calcium-binding EF-hand family protein                              | AT1G78410   | VQ motif-containing protein                                          | AT5G64930                | Constitutive expression of pr genes 5 (CPR5)                         |
| AT1G25400                                       | Unknown protein                                                     | AT3G28210   | zinc finger AN1 domain-containing stress-associated protein 12 (PMZ) | AT2G35980                | Yellow-leaf-specific gene 9 (YLS9)                                   |
| AT1G78410                                       | VQ motif-containing protein                                         | AT4G23810   | WRKY transcription factor (WRKY53)                                   | AT3G23240                | Ethylene response factor 1 (ERF1)                                    |
| AT4G25390                                       | Protein kinase superfamily protein                                  | AT3G57240   | Beta-1,3-glucanase 3 (B3)                                            | AT1G78410                | VQ motif-containing protein                                          |
| AT1G15430                                       | Unknown protein                                                     | AT5G64930   | Constitutive expression of pr genes 5 (CPR5)                         | AT4G02380                | late embryogenesis abundant like protein (SAG21)                     |
| AT4G39670                                       | Glycolipid transfer protein (GLTP) family protein                   | AT3G23240   | Ethylene response factor 1 (ERF1)                                    | AT3G28210                | zinc finger AN1 domain-containing stress-associated protein 12 (PMZ) |

|           |                                                                      |           |                                                                     |           |                                        |
|-----------|----------------------------------------------------------------------|-----------|---------------------------------------------------------------------|-----------|----------------------------------------|
| AT1G28190 | Unknown protein                                                      | AT2G44840 | Ethylene-responsive element binding factor 13 (ERF13)               | AT3G15500 | NAC domain containing protein 3 (NAC3) |
| AT1G64610 | Transducin/WD40 repeat-like superfamily protein                      | AT2G19190 | Flg22-induced receptor-like kinase 1 (FRK1)                         |           |                                        |
| AT2G27500 | Glycosyl hydrolase superfamily protein                               | AT3G15500 | NAC domain containing protein 3 (NAC3)                              |           |                                        |
| AT3G09020 | Alpha 1,4-glycosyltransferase family protein                         | AT2G14610 | Pathogenesis-related gene 1 (PR1)                                   |           |                                        |
| AT5G38710 | Methylenetetrahydrofolate reductase family protein                   | AT3G26830 | cytochrome P450 71B15 (PAD3)                                        |           |                                        |
| AT3G01830 | Calcium-binding EF-hand family protein                               | AT4G02380 | late embryogenesis abundant like protein (SAG21)                    |           |                                        |
| AT2G26530 | Unknown protein(AR781)                                               | AT2G03760 | flavonol sulfotransferase-like protein (SOT12)                      |           |                                        |
| AT3G10800 | Putative membrane-tethered transcriptional factor(BZIP28)            | AT2G24850 | Tyrosine aminotransferase 3 (TAT3)                                  |           |                                        |
| AT1G28480 | Glutaredoxin(GRX480)                                                 | AT5G22570 | WRKY transcription factor 38 (WRKY38)                               |           |                                        |
| AT3G28210 | zinc finger AN1 domain-containing stress-associated protein 12 (PMZ) | AT5G26170 | WRKY transcription factor 50 (WRKY50)                               |           |                                        |
| AT1G22400 | (UGT85A1)                                                            | AT2G35980 | late embryogenesis abundant hydroxyproline-rich glycoprotein (YLS9) |           |                                        |
| AT3G10640 | (VPS60.1)                                                            |           |                                                                     |           |                                        |

|           |                                                             |  |  |  |  |
|-----------|-------------------------------------------------------------|--|--|--|--|
| AT4G26080 | ABA insensitive 1 (ABI1)                                    |  |  |  |  |
| AT5G13320 | Avrpphb susceptible 3 (PBS3)                                |  |  |  |  |
| AT1G42990 | Basic region/leucine zipper motif 60 (bZIP60)               |  |  |  |  |
| AT5G47120 | Bax inhibitor 1 (BI1)                                       |  |  |  |  |
| AT5G26920 | CAM-binding protein 60-like g (CBP60g)                      |  |  |  |  |
| AT5G64930 | Constitutive expression of pr genes 5 (CPR5)                |  |  |  |  |
| AT4G04490 | Cysteine-rich rlk (receptor-like protein kinase) 36 (CRK36) |  |  |  |  |
| AT4G00550 | Digalactosyl diacylglycerol deficient 2 (DGD2)              |  |  |  |  |
| AT3G60190 | Dynammin-like 1e (DL1E)                                     |  |  |  |  |
| AT1G28370 | Erf domain protein 11 (ERF11)                               |  |  |  |  |
| AT3G23240 | Ethylene response factor 1 (ERF1)                           |  |  |  |  |
| AT5G47220 | Ethylene responsive element binding factor 2 (ERF2)         |  |  |  |  |
| AT3G15210 | Ethylene responsive element binding factor 4 (ERF4)         |  |  |  |  |
| AT1G73730 | Ethylene-insensitive3-like 3 (EIL3)                         |  |  |  |  |
| AT3G63010 | GA insensitive dwarf1b (GID1B)                              |  |  |  |  |

|           |                                                  |  |  |  |  |
|-----------|--------------------------------------------------|--|--|--|--|
| AT5G27320 | GA insensitive dwarf1c (GID1C)                   |  |  |  |  |
| AT5G13190 | GSH-induced litaf domain protein (GILP)          |  |  |  |  |
| AT5G01540 | Lectin receptor kinase a4.1 (LECRKa4.1)          |  |  |  |  |
| AT1G01560 | MAP kinase 11 (MPK11)                            |  |  |  |  |
| AT1G10210 | Mitogen-activated protein kinase 1 (MPK1)        |  |  |  |  |
| AT1G51660 | Mitogen-activated protein kinase kinase 4 (MKK4) |  |  |  |  |
| AT3G06490 | Myb domain protein 108 (MYB108)                  |  |  |  |  |
| AT3G15500 | NAC domain containing protein 3 (NAC3)           |  |  |  |  |
| AT2G26560 | Phospholipase a 2a (PLA2a)                       |  |  |  |  |
| AT3G05360 | Receptor like protein 30 (RLP30)                 |  |  |  |  |
| AT1G69270 | Receptor-like protein kinase 1 (RPK1)            |  |  |  |  |
| AT5G63970 | Ring domain ligase 3 (RGLG3)                     |  |  |  |  |
| AT4G02380 | late embryogenesis abundant like protein (SAG21) |  |  |  |  |
| AT4G24210 | Sleepy1 (SLY1)                                   |  |  |  |  |
| AT3G52400 | Syntaxin of plants 122 (SYP122)                  |  |  |  |  |

|                                           |                                                                     |             |                                                                      |                          |                                                                     |
|-------------------------------------------|---------------------------------------------------------------------|-------------|----------------------------------------------------------------------|--------------------------|---------------------------------------------------------------------|
| AT3G16720                                 | Toxicos en levadura 2 (AT12)                                        |             |                                                                      |                          |                                                                     |
| AT2G38470                                 | WRKY transcription factor 33 (WRKY33)                               |             |                                                                      |                          |                                                                     |
| AT5G64810                                 | WRKY transcription factor 51 (WRKY51)                               |             |                                                                      |                          |                                                                     |
| AT2G35980                                 | late embryogenesis abundant hydroxyproline-rich glycoprotein (YLS9) |             |                                                                      |                          |                                                                     |
| <b>Response to jasmonic acid stimulus</b> |                                                                     |             |                                                                      |                          |                                                                     |
| <b>Leaves at 29 DAS</b>                   |                                                                     | <i>igr2</i> |                                                                      | <b>Overlapping genes</b> |                                                                     |
| AT1G25400                                 | Unknown protein                                                     | AT1G78410   | VQ motif-containing protein                                          | AT1G27730                | cys2/His2-type zinc-finger protein                                  |
| AT1G32920                                 | Unknown protein                                                     | AT3G28210   | zinc finger AN1 domain-containing stress-associated protein 12 (PMZ) | AT5G64930                | Constitutive expression of pr genes 5 (CPR5)                        |
| AT1G63720                                 | Hydroxyproline-rich glycoprotein family protein                     | AT4G23810   | WRKY Transcription Factor (WRKY53)                                   | AT5G46050                | Peptide transporter 3 (PTR3)                                        |
| AT3G57450                                 | Unknown protein                                                     | AT3G57240   | Beta-1,3-glucanase 3 (BG3)                                           | AT2G35980                | late embryogenesis abundant hydroxyproline-rich glycoprotein (YLS9) |
| AT1G28190                                 | Unknown protein                                                     | AT2G47000   | ABC transporter B family member 4 (ABCB4)                            | AT4G35770                | Senescence 1 (SEN1)                                                 |
| AT4G33905                                 | Peroxisomal membrane 22 kDa (Mpv17/PMP22) family protein            | AT5G20230   | blue copper binding protein (SAG14)                                  | AT3G23240                | Ethylene response factor 1 (ERF1)                                   |
| AT2G27500                                 | Glycosyl hydrolase superfamily protein                              | AT3G48360   | Btb and taz domain protein 2 (BT2)                                   | AT2G47000                | ABC transporter B family member 4 (ABCB4)                           |

|           |                                                   |           |                                                       |           |                                                                      |
|-----------|---------------------------------------------------|-----------|-------------------------------------------------------|-----------|----------------------------------------------------------------------|
| AT3G09020 | Alpha 1,4-glycosyltransferase family protein      | AT5G64930 | Constitutive expression of pr genes 5 (CPR5)          | AT1G78410 | VQ motif-containing protein                                          |
| AT3G01830 | Calcium-binding EF-hand family protein            | AT3G23240 | Ethylene response factor 1 (ERF1)                     | AT5G39610 | NAC domain containing protein 2 (NAC2)                               |
| AT3G47480 | Calcium-binding EF-hand family protein            | AT2G44840 | Ethylene-responsive element binding factor 13 (ERF13) | AT4G02380 | late embryogenesis abundant like protein (SAG21)                     |
| AT5G52660 | Homeodomain-like superfamily protein              | AT2G19190 | Flg22-induced receptor-like kinase 1 (FRK1)           | AT3G28210 | zinc finger AN1 domain-containing stress-associated protein 12 (PMZ) |
| AT1G74840 | Homeodomain-like superfamily protein              | AT4G37260 | MYB domain protein 73 (MYB73)                         | AT3G15500 | NAC domain containing protein 3 (NAC3)                               |
| AT1G78410 | VQ motif-containing protein                       | AT5G39610 | NAC domain containing protein 2 (NAC2)                |           |                                                                      |
| AT4G25390 | Protein kinase superfamily protein                | AT3G15500 | NAC domain containing protein 3 (NAC3)                |           |                                                                      |
| AT1G15430 | Unknown protein                                   | AT2G14610 | Pathogenesis-related gene 1 (PR1)                     |           |                                                                      |
| AT4G39670 | Glycolipid transfer protein (GLTP) family protein | AT5G46050 | Peptide transporter 3 (PTR3)                          |           |                                                                      |
| AT4G28085 | Unknown protein                                   | AT3G26830 | cytochrome P450 71B15 (PAD3)                          |           |                                                                      |
| AT1G64610 | Transducin/WD40 repeat-like superfamily protein   | AT5G44420 | Plant defensin 1.2 (PDF1.2)                           |           |                                                                      |
| AT4G01280 | Homeodomain-like superfamily protein              | AT4G27410 | NAC domain-containing protein 72 (RD26)               |           |                                                                      |
| AT1G63840 | RING/U-box superfamily protein                    | AT1G27730 | cys2/His2-type zinc-finger protein                    |           |                                                                      |

|           |                                                                      |           |                                                                     |  |  |
|-----------|----------------------------------------------------------------------|-----------|---------------------------------------------------------------------|--|--|
| AT5G38710 | Methylenetetrahydrofolate reductase family protein                   | AT4G35770 | Senescence 1 (SEN1)                                                 |  |  |
| AT2G26530 | Unknown protein(AR781)                                               | AT4G02380 | late embryogenesis abundant like protein (SAG21)                    |  |  |
| AT1G01720 | Putative transcriptional activators with NAC domain (ATAF1)          | AT2G30360 | CBL-interacting serine/threonine-protein kinase 11 (SIP4)           |  |  |
| AT3G10800 | (BZIP28)                                                             | AT2G03760 | flavonol sulfotransferase-like protein (SOT12)                      |  |  |
| AT1G28480 | Glutaredoxin (GRX480)                                                | AT2G24850 | Tyrosine aminotransferase 3 (TAT3)                                  |  |  |
| AT3G28210 | zinc finger AN1 domain-containing stress-associated protein 12 (PMZ) | AT5G22570 | WRKY transcription factor 38 (WRKY38)                               |  |  |
| AT1G22400 | (UGT85A1)                                                            | AT5G26170 | putative WRKY transcription factor 50 (WRKY50)                      |  |  |
| AT3G10640 | (VPS60.1)                                                            | AT2G35980 | late embryogenesis abundant hydroxyproline-rich glycoprotein (YLS9) |  |  |
| AT2G34720 | Nuclear factor y, subunit a4 (NF-YA4)                                |           |                                                                     |  |  |
| AT4G26080 | ABA insensitive 1 (ABI1)                                             |           |                                                                     |  |  |
| AT2G47000 | ABC transporter B family member 4 (ABCB4)                            |           |                                                                     |  |  |
| AT5G13320 | Avrpphb susceptible 3 (PBS3)                                         |           |                                                                     |  |  |

|           |                                                             |  |  |  |  |
|-----------|-------------------------------------------------------------|--|--|--|--|
| AT1G42990 | Basic region/leucine zipper motif 60 (bZIP60)               |  |  |  |  |
| AT5G47120 | Bax inhibitor 1 (BI1)                                       |  |  |  |  |
| AT3G61190 | Bon association protein 1 (BAP1)                            |  |  |  |  |
| AT1G76650 | Calmodulin-like 38 (CML38)                                  |  |  |  |  |
| AT5G26920 | Cam-binding protein 60-like g (CBP60G)                      |  |  |  |  |
| AT5G27420 | Carbon/nitrogen insensitive 1 (CNI1)                        |  |  |  |  |
| AT3G07370 | Carboxyl terminus of hsc70-interacting protein (CHIP)       |  |  |  |  |
| AT1G71697 | Choline kinase 1 (CK1)                                      |  |  |  |  |
| AT4G19810 | Class V chitinase (CHIC)                                    |  |  |  |  |
| AT5G64930 | Constitutive expression of pr genes 5 (CPR5)                |  |  |  |  |
| AT4G04490 | Cysteine-rich rlk (receptor-like protein kinase) 36 (CRK36) |  |  |  |  |
| AT4G00550 | Digalactosyl diacylglycerol deficient 2 (DGD2)              |  |  |  |  |
| AT3G60190 | Dynamamin-like 1e (DL1E)                                    |  |  |  |  |
| AT1G28370 | Erf domain protein 11 (ERF11)                               |  |  |  |  |
| AT3G23240 | Ethylene response factor 1 (ERF1)                           |  |  |  |  |



|           |                                                     |  |  |  |  |
|-----------|-----------------------------------------------------|--|--|--|--|
| AT5G47220 | Ethylene responsive element binding factor 2 (ERF2) |  |  |  |  |
| AT3G15210 | Ethylene responsive element binding factor 4 (ERF4) |  |  |  |  |
| AT1G73730 | Ethylene-insensitive3-like 3 (EIL3)                 |  |  |  |  |
| AT2G46270 | G-box binding factor 3 (GBF3)                       |  |  |  |  |
| AT3G63010 | GA insensitive dwarf1b (GIB1B)                      |  |  |  |  |
| AT5G27320 | GA insensitive dwarf1c (GID1C)                      |  |  |  |  |
| AT5G13190 | GSH-induced litaf domain protein (GILP)             |  |  |  |  |
| AT1G51950 | Indole-3-acetic acid inducible 18 (IAA18)           |  |  |  |  |
| AT5G01540 | Lectin receptor kinase a4.1 (LECRKA4.1)             |  |  |  |  |
| AT1G01560 | MAP kinase 11 (MPK11)                               |  |  |  |  |
| AT5G10300 | Methyl esterase 5 (MES5)                            |  |  |  |  |
| AT1G10210 | Mitogen-activated protein kinase 1 (MPK1)           |  |  |  |  |
| AT1G51660 | Mitogen-activated protein kinase kinase 4 (MKK4)    |  |  |  |  |
| AT3G06490 | Myb domain protein 108 (MYB108)                     |  |  |  |  |

|           |                                        |  |  |  |  |
|-----------|----------------------------------------|--|--|--|--|
| AT1G06180 | Myb domain protein 13 (MYB13)          |  |  |  |  |
| AT2G47190 | Myb domain protein 2 (MYB2)            |  |  |  |  |
| AT1G22640 | Myb domain protein 3 (MYB3)            |  |  |  |  |
| AT5G59780 | Myb domain protein 59 (MYB59)          |  |  |  |  |
| AT2G16720 | Myb domain protein 7 (MYB7)            |  |  |  |  |
| AT1G71030 | Myb-like 2 (MYB12)                     |  |  |  |  |
| AT5G39610 | NAC domain containing protein 2 (NAC2) |  |  |  |  |
| AT3G15500 | NAC domain containing protein 3 (NAC3) |  |  |  |  |
| AT5G46050 | Peptide transporter 3 (PTR3)           |  |  |  |  |
| AT2G26560 | Phospholipase a 2a (PLAA)              |  |  |  |  |
| AT3G02150 | Plastid transcription factor 1 (PTF1)  |  |  |  |  |
| AT3G05360 | Receptor like protein 30 (RLP30)       |  |  |  |  |
| AT1G69270 | Receptor-like protein kinase 1 (RPK1)  |  |  |  |  |
| AT5G13330 | Related to ap2 6l (RAP2.6l)            |  |  |  |  |
| AT5G59820 | Responsive to high light 41 (RHL41)    |  |  |  |  |
| AT5G63970 | Ring domain ligase 3 (RGLG3)           |  |  |  |  |
| AT1G27730 | cys2/His2-type zinc-finger protein     |  |  |  |  |

|                                      |                                                                     |             |                                                                                                     |                          |                                    |
|--------------------------------------|---------------------------------------------------------------------|-------------|-----------------------------------------------------------------------------------------------------|--------------------------|------------------------------------|
| AT4G35770                            | Senescence 1 (SEN1)                                                 |             |                                                                                                     |                          |                                    |
| AT4G02380                            | late embryogenesis abundant like protein (SAG21)                    |             |                                                                                                     |                          |                                    |
| AT4G24210                            | Sleepy1 (SLY1)                                                      |             |                                                                                                     |                          |                                    |
| AT1G74020                            | Strictosidine synthase 2 (SS2)                                      |             |                                                                                                     |                          |                                    |
| AT3G52400                            | Syntaxin of plants 122 (SYP122)                                     |             |                                                                                                     |                          |                                    |
| AT3G16720                            | Toxicos en levadura 2 (AT12)                                        |             |                                                                                                     |                          |                                    |
| AT2G38470                            | WRKY transcription factor 33 (WRKY33)                               |             |                                                                                                     |                          |                                    |
| AT5G64810                            | WRKY transcription factor 51 (WRKY51)                               |             |                                                                                                     |                          |                                    |
| AT5G51640                            | Yellow-leaf-specific gene 7 (YLS7)                                  |             |                                                                                                     |                          |                                    |
| AT2G35980                            | late embryogenesis abundant hydroxyproline-rich glycoprotein (YLS9) |             |                                                                                                     |                          |                                    |
| AT3G19580                            | Zinc-finger protein 2 (ZF2)                                         |             |                                                                                                     |                          |                                    |
| <b>Response to ethylene stimulus</b> |                                                                     |             |                                                                                                     |                          |                                    |
| <b>Leaves at 29 DAS</b>              |                                                                     | <i>igr2</i> |                                                                                                     | <b>Overlapping genes</b> |                                    |
| AT4G01870                            | TolB protein-related                                                | AT3G28580   | AAA-type ATPase family protein                                                                      | AT1G27730                | cys2/His2-type zinc-finger protein |
| AT1G32920                            | Unknown protein                                                     | AT4G18450   | A member of the ERF (ethylene response factor) subfamily B-3 of ERF/AP2 transcription factor family | AT1G28360                | Erf domain protein 12 (ERF12)      |

|           |                                                                          |           |                                                                                      |           |                                                                      |
|-----------|--------------------------------------------------------------------------|-----------|--------------------------------------------------------------------------------------|-----------|----------------------------------------------------------------------|
| AT4G30390 | Unknown protein                                                          | AT1G78410 | VQ motif-containing protein                                                          | AT3G23240 | Ethylene response factor 1 (ERF1)                                    |
| AT3G54150 | S-adenosyl-L-methionine-dependent methyltransferases superfamily protein | AT3G25190 | Nodulin-like21                                                                       | AT2G47000 | ABC transporter B family member 4 (ABCB4)                            |
| AT1G63720 | Hydroxyproline-rich glycoprotein family protein                          | AT3G28210 | zinc finger AN1 domain-containing stress-associated protein 12 (PMZ)                 | AT1G78410 | VQ motif-containing protein                                          |
| AT2G32030 | Acyl-CoA N-acyltransferases (NAT) superfamily protein                    | AT2G47000 | ABC transporter B family member 4 (ABCB4)                                            | AT5G39610 | NAC domain containing protein 2 (NAC2)                               |
| AT1G28190 | Unknown protein                                                          | AT3G55950 | putative serine/threonine-protein kinase-like protein CCR3 (CCR3)                    | AT3G28210 | zinc finger AN1 domain-containing stress-associated protein 12 (PMZ) |
| AT4G19370 | Unknown protein                                                          | AT1G28360 | Erf domain protein 12 (ERF12)                                                        | AT3G15500 | NAC domain containing protein 3 (NAC3)                               |
| AT1G69890 | Unknown protein                                                          | AT3G23240 | Ethylene response factor 1 (ERF1)                                                    |           |                                                                      |
| AT5G27760 | Hypoxia-responsive family protein                                        | AT4G17490 | ethylene response factor subfamily B-3 of ERF/AP2 transcription factor family (ERF6) |           |                                                                      |
| AT4G37290 | Unknown protein                                                          | AT2G44840 | Ethylene-responsive element binding factor 13 (ERF13)                                |           |                                                                      |
| AT1G05575 | Unknown protein                                                          | AT4G37260 | Myb domain protein 73 (MYB73)                                                        |           |                                                                      |
| AT5G65600 | Concanavalin A-like lectin protein kinase family protein                 | AT3G50060 | Myb domain protein 77 (MYB77)                                                        |           |                                                                      |
| AT1G26380 | FAD-binding Berberine family protein                                     | AT5G39610 | NAC domain containing protein 2 (NAC2)                                               |           |                                                                      |

|           |                                                   |           |                                                           |  |  |
|-----------|---------------------------------------------------|-----------|-----------------------------------------------------------|--|--|
| AT5G52660 | Homeodomain-like superfamily protein              | AT3G15500 | NAC domain containing protein 3 (NAC3)                    |  |  |
| AT1G74840 | Homeodomain-like superfamily protein              | AT5G04950 | Nicotianamine synthase 1 (NAS1)                           |  |  |
| AT1G78410 | VQ motif-containing protein                       | AT3G48850 | Phosphate transporter 3;2 (PHT3;2)                        |  |  |
| AT2G27310 | F-box family protein                              | AT3G26830 | cytochrome P450 71B15 (PAD3)                              |  |  |
| AT1G23710 | Unknown protein                                   | AT5G44420 | Plant defensin 1.2 (PDF1.2)                               |  |  |
| AT4G33940 | RING/U-box superfamily protein                    | AT5G54190 | Protochlorophyllide oxidoreductase a (PORA)               |  |  |
| AT4G13820 | Leucine-rich repeat (LRR) family protein          | AT4G27440 | protochlorophyllide oxidoreductase B (PORB)               |  |  |
| AT1G15430 | unknown protein                                   | AT4G27410 | NAC domain-containing protein 72 (RD26)                   |  |  |
| AT1G76600 | unknown protein                                   | AT1G27730 | cys2/His2-type zinc-finger protein                        |  |  |
| AT4G39670 | Glycolipid transfer protein (GLTP) family protein | AT2G30360 | CBL-interacting serine/threonine-protein kinase 11 (SIP4) |  |  |
| AT4G01280 | Homeodomain-like superfamily protein              | AT2G24850 | Tyrosine aminotransferase 3 (TAT3)                        |  |  |
| AT1G64610 | Transducin/WD40 repeat-like superfamily protein   |           |                                                           |  |  |
| AT3G48760 | DHHC-type zinc finger family protein              |           |                                                           |  |  |
| AT5G65300 | unknown protein                                   |           |                                                           |  |  |
| AT1G63840 | RING/U-box superfamily protein                    |           |                                                           |  |  |

|           |                                                                      |  |  |  |  |
|-----------|----------------------------------------------------------------------|--|--|--|--|
| AT1G28480 | Glutaredoxin (GRX480)                                                |  |  |  |  |
| AT3G28210 | zinc finger AN1 domain-containing stress-associated protein 12 (PMZ) |  |  |  |  |
| AT3G10640 | (VPS60.1)                                                            |  |  |  |  |
| AT5G57220 | Cytochrome p450, family 81, subfamily f, polypeptide 2 (CYP81F2)     |  |  |  |  |
| AT2G34720 | Nuclear factor y, subunit a4 (NF-YA4)                                |  |  |  |  |
| AT4G26080 | ABA insensitive 1 (ABI1)                                             |  |  |  |  |
| AT3G12740 | Ala-interacting subunit 1 (ALIS1)                                    |  |  |  |  |
| AT1G32350 | Alternative oxidase 1d (AOX1D)                                       |  |  |  |  |
| AT2G47000 | ABC transporter B family member 4 (ABCB4)                            |  |  |  |  |
| AT2G21240 | Basic pentacysteine 4 (BPC4)                                         |  |  |  |  |
| AT1G42990 | Basic region/leucine zipper motif 60 (bZIP60)                        |  |  |  |  |
| AT1G76650 | Calmodulin-like 38 (CML38)                                           |  |  |  |  |
| AT5G27420 | Carbon/nitrogen insensitive 1 (CNI1)                                 |  |  |  |  |

|           |                                                       |  |  |  |  |
|-----------|-------------------------------------------------------|--|--|--|--|
| AT3G07370 | Carboxyl terminus of hsc70-interacting protein (CHIP) |  |  |  |  |
| AT1G30270 | Cbl-interacting protein kinase 23 (CIPK23)            |  |  |  |  |
| AT5G25350 | Ein3-binding f box protein 2 (EBF2)                   |  |  |  |  |
| AT1G28370 | Erf domain protein 11 (ERF11)                         |  |  |  |  |
| AT1G28360 | Erf domain protein 12 (ERF12)                         |  |  |  |  |
| AT3G23240 | Ethylene response factor 1 (ERF1)                     |  |  |  |  |
| AT3G20310 | Ethylene response factor 7 (ERF7)                     |  |  |  |  |
| AT1G53170 | Ethylene response factor 8 (ERF8)                     |  |  |  |  |
| AT4G17500 | Ethylene responsive element binding factor 1 (ERF-1)  |  |  |  |  |
| AT5G47220 | Ethylene responsive element binding factor 2 (ERF2)   |  |  |  |  |
| AT3G15210 | Ethylene responsive element binding factor 4 (ERF4)   |  |  |  |  |
| AT3G20770 | Ethylene-insensitive3 (ETN3)                          |  |  |  |  |
| AT1G73730 | Ethylene-insensitive3-like 3 (EIL3)                   |  |  |  |  |
| AT2G26300 | G protein alpha subunit 1 (GP alpha 1)                |  |  |  |  |

|           |                                                            |  |  |  |  |
|-----------|------------------------------------------------------------|--|--|--|--|
| AT2G46270 | G-box binding factor 3 (GBF3)                              |  |  |  |  |
| AT3G63010 | GA insensitive dwarf1b (GID1b)                             |  |  |  |  |
| AT5G27320 | GA insensitive dwarf1c (GID1c)                             |  |  |  |  |
| AT1G68765 | Inflorescence deficient in abscission (IDA)                |  |  |  |  |
| AT4G32040 | Knotted1-like homeobox gene 5 (KNAT5)                      |  |  |  |  |
| AT4G20380 | Lesion simulating disease (LSD1)                           |  |  |  |  |
| AT1G01560 | MAP kinase 11 (MPK11)                                      |  |  |  |  |
| AT1G73500 | MAP kinase kinase 9 (MKK9)                                 |  |  |  |  |
| AT3G48890 | Membrane-associated progesterone binding protein 3 (MAPR3) |  |  |  |  |
| AT1G10210 | Mitogen-activated protein kinase 1 (MPK1)                  |  |  |  |  |
| AT3G58680 | Multiprotein bridging factor 1b (MBF1B)                    |  |  |  |  |
| AT3G24500 | Multiprotein bridging factor 1c (MBF1C)                    |  |  |  |  |
| AT3G06490 | Myb domain protein 108 (MYB108)                            |  |  |  |  |
| AT2G47190 | Myb domain protein 2 (MYB2)                                |  |  |  |  |
| AT1G22640 | Myb domain protein 3 (MYB3)                                |  |  |  |  |



|           |                                                                    |  |  |  |  |
|-----------|--------------------------------------------------------------------|--|--|--|--|
| AT5G59780 | Myb domain protein 59 (MYB59)                                      |  |  |  |  |
| AT3G11440 | Myb domain protein 65 (MYB65)                                      |  |  |  |  |
| AT2G16720 | Myb domain protein 7 (MYB7)                                        |  |  |  |  |
| AT1G71030 | Myb-like 2 (MYB12)                                                 |  |  |  |  |
| AT5G39610 | NAC domain containing protein 2 (NAC2)                             |  |  |  |  |
| AT3G15500 | NAC domain containing protein 3 (NAC3)                             |  |  |  |  |
| AT2G43000 | NAC domain containing protein 42 (NAC42)                           |  |  |  |  |
| AT5G06960 | Ocs-element binding factor 5 (OBF5)                                |  |  |  |  |
| AT3G04720 | Pathogenesis-related 4 (PR4)                                       |  |  |  |  |
| AT2G26560 | Phospholipase a 2a (PLA2A)                                         |  |  |  |  |
| AT3G02800 | Plant and fungi atypical dual-specificity phosphatase 3 (PFA-DSP3) |  |  |  |  |
| AT1G69270 | Receptor-like protein kinase 1 (RPK1)                              |  |  |  |  |
| AT1G78080 | Related to ap2 4 (RAP2.4)                                          |  |  |  |  |
| AT5G13330 | Related to ap2 6l (RAP2.6l)                                        |  |  |  |  |
| AT3G46620 | Ring and domain of unknown function 117 1 (RDUF1)                  |  |  |  |  |

|                                           |                                                 |             |                                                                      |                          |                                           |
|-------------------------------------------|-------------------------------------------------|-------------|----------------------------------------------------------------------|--------------------------|-------------------------------------------|
| AT1G27730                                 | cys2/His2-type zinc-finger protein              |             |                                                                      |                          |                                           |
| AT4G24210                                 | Sleepy1 (SLY1)                                  |             |                                                                      |                          |                                           |
| AT3G52400                                 | Syntaxin of plants 122 (SYP122)                 |             |                                                                      |                          |                                           |
| AT3G21780                                 | UDP-glucosyl transferase 71b6 (DGT71b6)         |             |                                                                      |                          |                                           |
| AT2G15490                                 | UDP-glycosyltransferase 73b4 (UGT73b4)          |             |                                                                      |                          |                                           |
| AT4G29380                                 | Vacuolar protein sorting 15 (VPS15)             |             |                                                                      |                          |                                           |
| AT5G13080                                 | WRKY transcription factor 75 (WRKY75)           |             |                                                                      |                          |                                           |
| AT5G51640                                 | Yellow-leaf-specific gene 7 (YLS7)              |             |                                                                      |                          |                                           |
| AT3G19580                                 | Zinc-finger protein 2 (ZF2)                     |             |                                                                      |                          |                                           |
| <b>Response to abscisic acid stimulus</b> |                                                 |             |                                                                      |                          |                                           |
| <b>Leaves at 29 DAS</b>                   |                                                 | <i>igr2</i> |                                                                      | <b>Overlapping genes</b> |                                           |
| AT3G54770                                 | RNA-binding (RRM/RBD/RNP motifs) family protein | AT3G28580   | AAA-type ATPase family protein                                       | AT1G27730                | cys2/His2-type zinc-finger protein        |
| AT4G01870                                 | TolB protein-related                            | AT2G32020   | GCN5-related N-acetyltransferase-like protein                        | AT5G46050                | Peptide transporter 3 (PTR3)              |
| AT2G32020                                 | GCN5-related N-acetyltransferase-like protein   | AT3G28210   | zinc finger AN1 domain-containing stress-associated protein 12 (PMZ) | AT2G47000                | ABC transporter B family member 4 (ABCB4) |

|           |                                                                          |           |                                                                   |           |                                                  |
|-----------|--------------------------------------------------------------------------|-----------|-------------------------------------------------------------------|-----------|--------------------------------------------------|
| AT1G73980 | Phosphoribulokinase / Uridine kinase family                              | AT1G48130 | 1-Cysteine peroxiredoxin 1 (PER1)                                 | AT5G39610 | NAC domain containing protein 2 (NAC2)           |
| AT3G54150 | S-adenosyl-L-methionine-dependent methyltransferases superfamily protein | AT4G11890 | protein kinase family protein                                     | AT2G32020 | GCN5-related N-acetyltransferase-like protein    |
| AT1G63720 | Hydroxyproline-rich glycoprotein family protein                          | AT2G47000 | ABC transporter B family member 4 (ABCB4)                         | AT4G02380 | late embryogenesis abundant like protein (SAG21) |
| AT3G22160 | VQ motif-containing protein                                              | AT3G48360 | BTB and TAZ domain protein 2 (BT2)                                | AT3G28210 | Putative zinc finger protein (PMZ).              |
| AT1G11210 | Unknown protein                                                          | AT3G55950 | putative serine/threonine-protein kinase-like protein CCR3 (CCR3) | AT3G15500 | NAC domain containing protein 3 (NAC3)           |
| AT3G57450 | Unknown protein                                                          | AT3G63060 | F-box protein (EDL3)                                              |           |                                                  |
| AT2G32030 | Acyl-CoA N-acyltransferases (NAT) superfamily protein                    | AT2G44840 | Ethylene-responsive element binding factor 13 (ERF13)             |           |                                                  |
| AT1G28190 | Unknown protein                                                          | AT2G47180 | galactinol synthase (GOLS1)                                       |           |                                                  |
| AT1G05575 | Unknown protein                                                          | AT4G37260 | Myb domain protein 73 (MYB73)                                     |           |                                                  |
| AT5G52660 | Homeodomain-like superfamily protein                                     | AT5G39610 | NAC domain containing protein 2 (NAC2)                            |           |                                                  |
| AT5G22540 | Unknown protein                                                          | AT3G15500 | NAC domain containing protein 3 (NAC3)                            |           |                                                  |
| AT1G74840 | Homeodomain-like superfamily protein                                     | AT5G46050 | Peptide transporter 3 (PTR3)                                      |           |                                                  |
| AT4G33940 | RING/U-box superfamily protein                                           | AT3G26830 | cytochrome P450 71B15 (PAD3)                                      |           |                                                  |
| AT2G27310 | F-box family protein                                                     | AT4G27410 | NAC domain-containing protein 72 (RD26)                           |           |                                                  |

|           |                                                            |           |                                                           |  |  |
|-----------|------------------------------------------------------------|-----------|-----------------------------------------------------------|--|--|
| AT1G15430 | Unknown protein                                            | AT1G27730 | cys2/His2-type zinc-finger protein                        |  |  |
| AT4G39670 | Glycolipid transfer protein (GLTP) family protein          | AT4G02380 | late embryogenesis abundant like protein (SAG21)          |  |  |
| AT4G01280 | Homeodomain-like superfamily protein                       | AT2G30360 | CBL-interacting serine/threonine-protein kinase 11 (SIP4) |  |  |
| AT1G64610 | Transducin/WD40 repeat-like superfamily protein            | AT2G24850 | Tyrosine aminotransferase 3 (TAT3)                        |  |  |
| AT3G12320 | Unknown protein                                            | AT1G05680 | Uridine diphosphate glycosyltransferase 74e2 (UGT74E2)    |  |  |
| AT3G48760 | DHHC-type zinc finger family protein                       |           |                                                           |  |  |
| AT5G65300 | Unknown protein                                            |           |                                                           |  |  |
| AT1G63840 | RING/U-box superfamily protein                             |           |                                                           |  |  |
| AT2G30020 | AP2C1                                                      |           |                                                           |  |  |
| AT2G23120 | Late embryogenesis abundant protein                        |           |                                                           |  |  |
| AT1G01720 | Putative transcriptional activators with NAC domain(ATAF1) |           |                                                           |  |  |
| AT3G10800 | Putative membrane-tethered transcriptional factor (BZIP28) |           |                                                           |  |  |
| AT3G01420 | Alpha-dioxygenase(DOX1)                                    |           |                                                           |  |  |
| AT1G28480 | Glutaredoxin (GRX480)                                      |           |                                                           |  |  |

|           |                                                                      |  |  |  |  |
|-----------|----------------------------------------------------------------------|--|--|--|--|
| AT2G23430 | Cyclin-dependent kinase inhibitor protein(ICK1)                      |  |  |  |  |
| AT3G63210 | Zinc-finger protein(MARD1)                                           |  |  |  |  |
| AT3G28210 | zinc finger AN1 domain-containing stress-associated protein 12 (PMZ) |  |  |  |  |
| AT3G10640 | (VPS60.1)                                                            |  |  |  |  |
| AT2G34720 | Nuclear factor Y, Subunit A4 (NF-YA4)                                |  |  |  |  |
| AT4G26080 | ABA insensitive 1 (ABI1)                                             |  |  |  |  |
| AT4G23450 | ABA insensitive ring protein 1(AIRP1)                                |  |  |  |  |
| AT5G20910 | ABI3-interacting protein 2(AIP2)                                     |  |  |  |  |
| AT3G19290 | ABRE binding factor 4(ABF4)                                          |  |  |  |  |
| AT3G12740 | ALA-interacting subunit 1(ALIS1)                                     |  |  |  |  |
| AT4G25000 | ALPHA-amylase-like (AMY1)                                            |  |  |  |  |
| AT1G32350 | ERF domain protein 11(ERF11)                                         |  |  |  |  |
| AT2G47000 | ABC transporter B family member 4 (ABCB4)                            |  |  |  |  |
| AT5G13320 | Avrpphb susceptible 3 (PBS3)                                         |  |  |  |  |
| AT1G42990 | Basic region/leucine zipper motif 60 (BZIP60)                        |  |  |  |  |
| AT5G47120 | Bax inhibitor1 (BI1)                                                 |  |  |  |  |

|           |                                                             |  |  |  |  |
|-----------|-------------------------------------------------------------|--|--|--|--|
| AT1G76650 | Calmodulin- like 38 (CML38)                                 |  |  |  |  |
| AT5G27420 | Carbon/nitrogen insensitive 1 (CNI1)                        |  |  |  |  |
| AT3G07370 | Carboxyl terminus of hsc70-interacting protein (CHIP)       |  |  |  |  |
| AT3G17510 | CBL-interacting protein kinase 1(CIPK1)                     |  |  |  |  |
| AT1G30270 | CBL-interacting protein kinase 23 (CIPK23)                  |  |  |  |  |
| AT4G19810 | Class V chitinase(ChiC)                                     |  |  |  |  |
| AT1G20440 | Cold-regulated 47 (COR47)                                   |  |  |  |  |
| AT3G50260 | Cooperatively refulated by ethylene and jasmonate 1 (CEJ1)  |  |  |  |  |
| AT1G62810 | Copper amine oxidase 1(CUAO1)                               |  |  |  |  |
| AT5G20650 | Copper transpoter 5(COPT5)                                  |  |  |  |  |
| AT4G21410 | Cysteine-rich rlk (receptor-like protein kinase) 29 (CRK29) |  |  |  |  |
| AT4G04490 | Cysteine-rich rlk (receptor-like protein kinase) 36 (CRK36) |  |  |  |  |
| AT3G55610 | Delta 1-pyrroline-5-carboxylate synthase 2 (P5CS2)          |  |  |  |  |
| AT4G00550 | Digalactosyl diacylglycerol deficient 2 (DGD2)              |  |  |  |  |

|           |                                                      |  |  |  |  |
|-----------|------------------------------------------------------|--|--|--|--|
| AT1G76180 | Early response to dehydration 14 (ERD14)             |  |  |  |  |
| AT5G11260 | Elongated hypocotyl 5 (HY5)                          |  |  |  |  |
| AT1G28370 | Erf domain protein 11 (ERF11)                        |  |  |  |  |
| AT3G20310 | Ethylene response factor 7 (ERF7)                    |  |  |  |  |
| AT4G17500 | Ethylene responsive element binding factor 1 (ERF-1) |  |  |  |  |
| AT5G47220 | Ethylene responsive element binding factor 2 (ERF2)  |  |  |  |  |
| AT3G15210 | Ethylene responsive element binding factor 4 (ERF4)  |  |  |  |  |
| AT3G20770 | Ethylene-insensitive3 (EIN3)                         |  |  |  |  |
| AT1G73730 | Ethylene-insensitive3-like 3 (EIL3)                  |  |  |  |  |
| AT3G14090 | Exocyst subunit exo70 family protein d3 (EXO70D3)    |  |  |  |  |
| AT4G08980 | F-box with wd-40 2 (FBW2)                            |  |  |  |  |
| AT2G26300 | G protein alpha subunit 1 (GP alpha 1)               |  |  |  |  |
| AT1G52920 | G protein coupled receptor (GPCR)                    |  |  |  |  |
| AT2G46270 | G-box binding factor 3 (GBF3)                        |  |  |  |  |
| AT3G63010 | GA insensitive dwarf1b (GID1B)                       |  |  |  |  |

|           |                                           |  |  |  |  |
|-----------|-------------------------------------------|--|--|--|--|
| AT5G27320 | GA insensitive dwarf1c (GID1C)            |  |  |  |  |
| AT1G56600 | Galactinol synthase 2 (GOLS2)             |  |  |  |  |
| AT1G07430 | Highly aba-induced pp2c gene 2 (HAI2)     |  |  |  |  |
| AT1G01470 | Late embryogenesis abundant 14 (LEA14)    |  |  |  |  |
| AT2G35300 | Late embryogenesis abundant 18 (LEA18)    |  |  |  |  |
| AT2G40170 | Late embryogenesis abundant 6 (GEA6)      |  |  |  |  |
| AT5G01540 | Lectin receptor kinase a4.1 (LECRKa4.1)   |  |  |  |  |
| AT5G01550 | Lectin receptor kinase a4.1 (LECRKa4.2)   |  |  |  |  |
| AT4G20380 | Lesion simulating disease (LSD1)          |  |  |  |  |
| AT1G02340 | Long hypocotyl in far-red (HFR1)          |  |  |  |  |
| AT3G50970 | Low temperature-induced 30 (LTI30)        |  |  |  |  |
| AT1G01560 | MAP kinase 11 (MPK11)                     |  |  |  |  |
| AT1G74660 | Mini zinc finger 1 (MIF1)                 |  |  |  |  |
| AT1G10210 | Mitogen-activated protein kinase 1 (MPK1) |  |  |  |  |



|           |                                                  |  |  |  |  |
|-----------|--------------------------------------------------|--|--|--|--|
| AT1G51660 | Mitogen-activated protein kinase kinase 4 (MKK4) |  |  |  |  |
| AT3G24500 | Multiprotein bridging factor 1c (MBF1c)          |  |  |  |  |
| AT3G06490 | Myb domain protein 108 (MYB108)                  |  |  |  |  |
| AT1G48000 | Myb domain protein 112 (MYB112)                  |  |  |  |  |
| AT2G47190 | Myb domain protein 2 (MYB2)                      |  |  |  |  |
| AT1G22640 | Myb domain protein 3 (MYB3)                      |  |  |  |  |
| AT5G59780 | Myb domain protein 59 (MYB59)                    |  |  |  |  |
| AT2G16720 | Myb domain protein 7 (MYB7)                      |  |  |  |  |
| AT5G49620 | Myb domain protein 78 (MYB78)                    |  |  |  |  |
| AT1G71030 | Myb-like 2 (MYB12)                               |  |  |  |  |
| AT5G39610 | NAC domain containing protein 2 (NAC2)           |  |  |  |  |
| AT3G15500 | NAC domain containing protein 3 (NAC3)           |  |  |  |  |
| AT5G13180 | NAC domain containing protein 83 (NAC083)        |  |  |  |  |
| AT3G14440 | Nine-cis-epoxycarotenoid dioxygenase 3 (NCED3)   |  |  |  |  |
| AT5G06960 | Ocs-element binding factor 5 (OBF5)              |  |  |  |  |

|           |                                                                    |  |  |  |  |
|-----------|--------------------------------------------------------------------|--|--|--|--|
| AT5G46050 | Peptide transporter 3 (PTR3)                                       |  |  |  |  |
| AT3G02800 | Plant and fungi atypical dual-specificity phosphatase 3 (PFA-DSP3) |  |  |  |  |
| AT2G33700 | Protein phosphatase 2c g group 1 (PP2CG1)                          |  |  |  |  |
| AT3G05360 | Receptor like protein 30 (RLP30)                                   |  |  |  |  |
| AT1G69270 | Receptor-like protein kinase 1 (RPK1)                              |  |  |  |  |
| AT5G13330 | Related to ap2 6l (RAP2.6l)                                        |  |  |  |  |
| AT3G46620 | Ring and domain of unknown function 1117 1 (RDUF1)                 |  |  |  |  |
| AT1G27730 | cys2/His2-type zinc-finger protein                                 |  |  |  |  |
| AT4G02380 | late embryogenesis abundant like protein (SAG21)                   |  |  |  |  |
| AT5G13170 | Senescence-associated gene 29 (SAG29)                              |  |  |  |  |
| AT1G17020 | Senescence-related gene 1 (SRG1)                                   |  |  |  |  |
| AT4G24210 | Sleepy1 (SLY1)                                                     |  |  |  |  |
| AT5G66880 | Sucrose nonfermenting 1(snf1)-related protein kinase 2.3 (SNRK2.3) |  |  |  |  |

|           |                                                                     |  |  |  |  |
|-----------|---------------------------------------------------------------------|--|--|--|--|
| AT3G52400 | Syntaxin of plants 122 (SYP122)                                     |  |  |  |  |
| AT5G37770 | Touch 2 (TCH2)                                                      |  |  |  |  |
| AT2G47770 | Tspo(outer membrane tryptophan-rich sensory protein)-related (TSPO) |  |  |  |  |
| AT3G02140 | Two or more abres-containing gene 2 (TMAC2)                         |  |  |  |  |
| AT3G21780 | Udp-glucosyl transferase 71b6 (UGT71B6)                             |  |  |  |  |
| AT5G51640 | Yellow-leaf-specific gene 7 (YLS7)                                  |  |  |  |  |
| AT3G19580 | Zinc-finger protein 2 (ZF2)                                         |  |  |  |  |

**Table S4.** List of NAC and WRKY transcription factors induced in the leaves of *igr2-9* and *GO5* (with overexpressed glycolate oxidase in the chloroplast) plants. The obtained data sets of *GO5* transcriptome were referred to the report by Balazadeh et al. (2014).

| <i>igr2</i> |                                           | <i>GO5</i> |                                            | Overlapping genes |                                                       |
|-------------|-------------------------------------------|------------|--------------------------------------------|-------------------|-------------------------------------------------------|
| AT5G26170   | WRKY transcription factor 50 (WRKY50)     | At2g38470  | WRKY transcription factor 33 (WRKY33)      | At4g23810         | WRKY transcription factor 53 (WRKY53)                 |
| AT5G24110   | WRKY DNA-binding protein (WRKY30)         | At2g30250  | WRKY transcription factor 25 (WRKY25)      | At3g10500         | NAC domain containing protein 053 (NAC053)<br>ANAC053 |
| AT5G22570   | WRKY transcription factor 38 (WRKY38)     | At4g23810  | WRKY transcription factor 53 (WRKY53)      |                   |                                                       |
| AT5G14000   | NAC domain containing protein 84 (NAC084) | At2g46400  | WRKY transcription factor 46 (WRKY46)      |                   |                                                       |
| AT5G01900   | WRKY transcription factor 62 (WRKY62)     | At1g80840  | WRKY transcription factor 40 (WRKY40)      |                   |                                                       |
| AT4G23810   | WRKY transcription factor 53 (WRKY53)     | At1g32870  | NAC domain containing protein 13 (NAC013)  |                   |                                                       |
| AT4G24240   | WRKY transcription factor 7 (WRKY7)       | At2g43000  | NAC domain containing protein 42 (NAC042)  |                   |                                                       |
| AT4G11070   | WRKY transcription factor 41 (WRKY41)     | At5g18270  | NAC domain containing protein 87 (NAC087)  |                   |                                                       |
| AT3G15500   | NAC domain-containing protein 3 (NAC3)    | At5g63790  | NAC domain containing protein 102 (NAC102) |                   |                                                       |
| AT3G10500   | NAC domain containing protein 53 (NAC053) | At3g10500  | NAC domain containing protein 053 (NAC053) |                   |                                                       |

|           |                                           |  |  |  |  |
|-----------|-------------------------------------------|--|--|--|--|
| AT3G01600 | NAC domain containing protein 44 (NAC044) |  |  |  |  |
| AT5G39610 | NAC-domain transcription factor (NAC2)    |  |  |  |  |

**Table S5.** Genes induced in the leaves of *gr1* plants grown under long-day conditions. The obtained data sets of *gr1* transcriptome were referred to the reports by Mhamdi et al. (2010).

| <b>TAIR Locus</b> | <b>Description</b>                                                  |
|-------------------|---------------------------------------------------------------------|
| AT3G55920         | Cyclophilin-like peptidyl-prolyl cis-trans isomerase family protein |
| AT3G62550         | Adenine nucleotide alpha hydrolases-like superfamily protein        |
| AT4G13180         | NAD(P)-binding rosmann-fold superfamily protein                     |
| AT3G14990         | DJ-1 homolog a (DJ1A)                                               |
| AT2G05380         | Glycine-rich protein 3 short isoform (GRP3S)                        |
| AT2G46970         | Phytochrome interacting factor 3-like 1 (PIL1)                      |
| AT5G48850         | Sulphur deficiency-induced 1 (AtSDI1)                               |

**Table S6.** Genes induced in the leaves of *cad2* plants grown under long-day conditions. The obtained data sets of *cad2* transcriptome were referred to the reports by Han et al. (2013).

| <b>TAIR Locus</b> | <b>Description</b>                                                              |
|-------------------|---------------------------------------------------------------------------------|
| AT1G07550         | Leucine-rich repeat protein kinase family protein                               |
| AT2G31600         | Unknown protein                                                                 |
| AT5G49000         | Galactose oxidase/kelch repeat superfamily protein                              |
| AT3G24060         | Plant self-incompatibility protein S1 family                                    |
| AT1G72140         | Major facilitator superfamily protein                                           |
| AT4G10240         | B-box zinc finger family protein                                                |
| AT5G23490         | Unknown protein                                                                 |
| AT2G29220         | Concanavalin A-like lectin protein kinase family protein                        |
| AT4G13050         | Acyl-ACP thioesterase                                                           |
| AT2G24160         | Leucine rich repeat protein family                                              |
| AT2G20070         | Unknown protein                                                                 |
| AT2G20170         | Unknown protein                                                                 |
| AT3G09360         | Cyclin/Brf1-like TBP-binding protein                                            |
| AT5G49690         | UDP-Glycosyltransferase superfamily protein                                     |
| AT3G42780         | Unknown protein                                                                 |
| AT2G16200         | Structural molecules                                                            |
| AT2G16900         | Phospholipase-like protein (PEARLI 4) family                                    |
| AT1G76210         | Unknown protein                                                                 |
| AT1G05577         | Unknown protein                                                                 |
| AT2G19400         | AGC (cAMP-dependent, cGMP-dependent and protein kinase C) kinase family protein |
| AT2G11462         | Unknown protein                                                                 |

|           |                                                                              |
|-----------|------------------------------------------------------------------------------|
| AT5G50510 | Molecular chaperone Hsp40/DnaJ family protein                                |
| AT3G53220 | Thioredoxin superfamily protein                                              |
| AT2G20910 | Vacuolar ATP synthase subunit B                                              |
| AT1G12720 | Transposable element gene                                                    |
| AT1G20360 | F-box family protein                                                         |
| AT2G46150 | Late embryogenesis abundant (LEA) hydroxyproline-rich glycoprotein family    |
| AT5G38780 | S-adenosyl-L-methionine-dependent methyltransferases superfamily protein     |
| AT3G48790 | Pyridoxal phosphate (PLP)-dependent transferases superfamily protein         |
| AT5G41710 | Transposable element gene                                                    |
| AT5G66270 | Zinc finger C-x8-C-x5-C-x3-H type family protein                             |
| AT5G28773 | Transposable element gene                                                    |
| AT5G35118 | Transposable element gene                                                    |
| AT2G02720 | Pectate lyase family protein                                                 |
| AT2G25260 | Unknown protein                                                              |
| AT2G19420 | Unknown protein                                                              |
| AT3G21937 | Unknown protein                                                              |
| AT5G59760 | Unknown protein                                                              |
| AT5G03700 | D-mannose binding lectin protein with Apple-like carbohydrate-binding domain |
| AT2G38152 | Alpha 1,4-glycosyltransferase family protein                                 |
| AT5G51080 | RNase H family protein                                                       |
| AT1G64720 | Membrane related protein (CP5)                                               |
| AT2G16500 | Arginine decarboxylase 1 (ADC1)                                              |
| AT3G53460 | Chloroplast rna-binding protein 29 (CP29)                                    |
| AT1G13790 | Factor of DNA methylation 4 (FDM4)                                           |
| AT4G03550 | Glucan synthase-like 5 (GSL05)                                               |



|           |                                                         |
|-----------|---------------------------------------------------------|
| AT5G67230 | Irregular xylem 14-like (IRX14-1)                       |
| AT1G32240 | Kanadi 2 (KAN2)                                         |
| AT5G56490 | 1-Gulono-1,4-lactone (1-gull) oxidase 4 (GULLO4)        |
| AT5G62250 | Microtubule-associated protein 65-9 (MAP65-9)           |
| AT5G46590 | NAC domain containing protein 96 (NAC096)               |
| AT3G57670 | No transmitting tract (NTT)                             |
| AT2G41210 | Phosphatidylinositol- 4-phosphate 5-kinase 5 (PIP5K5)   |
| AT4G29880 | Plant intracellular ras group-related lrr 7 (PIRL7)     |
| AT1G71270 | Poky pollen tube (POK)                                  |
| AT2G22410 | Slow growth 1 (SLO1)                                    |
| AT2G18990 | Thioredoxin domain-containing protein 9 homolog (TXND9) |
| AT3G27190 | Uridine kinase-like 2 (UKL2)                            |

**Table S7.** Comparative analysis of the up-regulated genes enriched in specific GO terms between the transcriptomes of leaves of *igr2-9* and *cat2* plants grown under short-day (SD) conditions. The specific GO terms were those cited in Fig. S5A. The obtained data sets of *cat2* transcriptome were referred to the report by Mhamdi et al. (2010).

| <b>Response to oxidative stress</b> |                                                                                     |             |                                                                         |                          |                                                     |  |
|-------------------------------------|-------------------------------------------------------------------------------------|-------------|-------------------------------------------------------------------------|--------------------------|-----------------------------------------------------|--|
| <i>igr2</i>                         |                                                                                     | <i>cat2</i> |                                                                         | <i>Overlapping genes</i> |                                                     |  |
| AT1G72660                           | P-loop containing nucleoside triphosphate hydrolases superfamily protein            | AT3G13610   | 2-oxoglutarate (2OG) and Fe(II)-dependent oxygenase superfamily protein | AT4G12400                | Carboxylate clamp-tetratricopeptide repeat proteins |  |
| AT2G21640                           | Hypothetical protein                                                                | AT1G75280   | Isoflavone reductase                                                    | AT5G20230                | Blue copper binding protein (SAG14)                 |  |
| AT1G44414                           | Unknown protein                                                                     | AT2G29500   | HSP20-like chaperones superfamily protein                               | AT2G47180                | Galactinol synthase 1(GOLS1)                        |  |
| AT1G17860                           | Kunitz family trypsin and protease inhibitor protein                                | AT2G46600   | Calcium-binding EF-hand family protein                                  | AT4G02380                | Late embryogenesis abundant like protein (SAG21)    |  |
| AT5G07330                           | Unknown protein                                                                     | AT1G07400   | HSP20-like chaperones superfamily protein.                              |                          |                                                     |  |
| AT1G54840                           | HSP20-like chaperones superfamily protein                                           | AT3G09440   | Heat shock protein 70 (HSP 70)                                          |                          |                                                     |  |
| AT4G18450                           | Ethylene response factor subfamily B-3 of ERF/AP2 transcription factor family (ERF) | AT3G44190   | FAD/NAD(P)-binding oxidoreductase family protein                        |                          |                                                     |  |
| AT1G72060                           | Serine-type endopeptidase inhibitors                                                | AT5G03630   | ATMDAR2                                                                 |                          |                                                     |  |
| AT1G78410                           | VQ motif-containing protein                                                         | AT1G09970   | leucine-rich repeat class of receptor-like kinase (LRR-RLKs)            |                          |                                                     |  |

|           |                                                                                         |           |                                                     |  |  |
|-----------|-----------------------------------------------------------------------------------------|-----------|-----------------------------------------------------|--|--|
| AT5G51440 | HSP20-like chaperones superfamily protein                                               | AT1G54100 | Aldehyde dehydrogenase 7b4 (ALDH7b4)                |  |  |
| AT3G25190 | Vacuolar iron transporter-like protein                                                  | AT2G16500 | Arginine decarboxylase 1 (ADC1)                     |  |  |
| AT1G14200 | RING/U-box superfamily protein                                                          | AT4G34710 | Arginine decarboxylase 2 (ADC2)                     |  |  |
| AT1G52200 | PLAC8 family protein                                                                    | AT1G07890 | Ascorbate peroxidase 1 (APX1)                       |  |  |
| AT2G20940 | Unknown protein(DUF1279)                                                                | AT5G20230 | Blue-copper-binding protein (SAG14)                 |  |  |
| AT5G37670 | HSP20-like chaperones superfamily protein                                               | AT5G67480 | Btb and taz domain protein 4 (BT4)                  |  |  |
| AT5G35320 | Unknown protein                                                                         | AT1G08830 | Copper/zinc superoxide dismutase 1 (CSD1)           |  |  |
| AT2G30480 | Unknown protein                                                                         | AT3G09350 | Fes1a (FES1a)                                       |  |  |
| AT4G23493 | Unknown protein                                                                         | AT2G47180 | Galactinol synthase 1 (GOLS1)                       |  |  |
| AT1G30070 | SGS domain-containing protein                                                           | AT2G29450 | Glutathione s-transferase tau 5 (GSTU5)             |  |  |
| AT3G25250 | Serine/threonine-protein kinase OXI1 (AGC2-1)                                           | AT1G78380 | Glutathione s-transferase tau 19 (GSTU19)           |  |  |
| AT4G23810 | WRKY Transcription Factor (WRKY53)                                                      | AT1G16030 | Heat shock protein 70b (HSP70B)                     |  |  |
| AT2G19590 | 1-aminocyclopropane-1-carboxylate oxidase (ACO1)                                        | AT5G52640 | Heat shock protein 90.1 (HSP90.1)                   |  |  |
| AT2G47000 | ABC transporter B family member 4 (ABCB4)                                               | AT2G26150 | Heat shock transcription factor a2 (HSFA2)          |  |  |
| AT3G62770 | Protein required for autophagosome formation during nutrient deprivation and senescence | AT4G12400 | Carboxylate clamp-tetratricopeptide repeat proteins |  |  |

|           |                                                            |           |                                                                      |  |  |
|-----------|------------------------------------------------------------|-----------|----------------------------------------------------------------------|--|--|
| AT2G46240 | Bcl-2-associated athanogene (BAG6)                         | AT1G72520 | Lipoxygenase 4 (LOX4)                                                |  |  |
| AT5G20230 | Blue copper binding protein (SAG14)                        | AT5G27600 | Long-chain acyl-coa synthetase 7 (LACS7)                             |  |  |
| AT5G63160 | BTB and TAZ domain protein (BT1)                           | AT4G25200 | Mitochondrion-localized small heat shock protein 23.6 (HSP23.6-mito) |  |  |
| AT3G48360 | BTB and TAZ domain protein2 (BT2)                          | AT3G24500 | Multiprotein bridging factor 1c (MBF1C)                              |  |  |
| AT1G76080 | Thioredoxin (CDSP32)                                       | AT2G06050 | Oxophytodienoate-reductase 3 (OPR3)                                  |  |  |
| AT5G64930 | Regulator of pathogenesis-related (PR) genes (HYS1)        | AT3G57520 | Seed imbibition 2 (SIP2)                                             |  |  |
| AT5G05410 | Dehydration-responsive element-binding protein 2A (DREB2A) | AT4G02380 | Late embryogenesis abundant like protein (SAG21)                     |  |  |
| AT3G63060 | F-box protein (EDL3)                                       |           |                                                                      |  |  |
| AT4G17490 | Ethylene responsive element binding factor 6 (ERF6)        |           |                                                                      |  |  |
| AT2G47180 | Galactinol synthase 1(GOLS1)                               |           |                                                                      |  |  |
| AT1G03850 | Glutaredoxin 13 (GRXS13)                                   |           |                                                                      |  |  |
| AT1G02930 | Glutathione S-transferase 6(GSTF6)                         |           |                                                                      |  |  |
| AT3G04120 | Cytosolic GADPH C subunit (GAPC1)                          |           |                                                                      |  |  |
| AT3G51910 | Heat shock transcription factor                            |           |                                                                      |  |  |
| AT1G65040 | Homolog of yeast HRD1 (HRD1B)                              |           |                                                                      |  |  |
| AT4G12400 | Carboxylate clamp-tetratricopeptide repeat proteins        |           |                                                                      |  |  |

|                                            |                                                  |             |  |                          |  |
|--------------------------------------------|--------------------------------------------------|-------------|--|--------------------------|--|
| AT1G73260                                  | Kunitz trypsin inhibitor 1 (KTI1)                |             |  |                          |  |
| AT3G05790                                  | Lon protease 4 (LON4)                            |             |  |                          |  |
| AT1G16420                                  | Cysteine-type endopeptidase 8(MC8)               |             |  |                          |  |
| AT5G39610                                  | NAC-domain transcription factor (NAC2)           |             |  |                          |  |
| AT5G04950                                  | Nicotianamine synthase 1 (NAS1)                  |             |  |                          |  |
| AT1G04980                                  | Disulfide isomerase-like protein (PDI10)         |             |  |                          |  |
| AT1G14870                                  | Plant cadmium resistance 2 (PCR2)                |             |  |                          |  |
| AT3G17790                                  | Purple acid phosphatase 17 (PAP17)               |             |  |                          |  |
| AT3G16050                                  | Pyridoxine biosynthesis 1.2 (PDX1.2)             |             |  |                          |  |
| AT3G25230                                  | FK506 binding protein (FKBP62)                   |             |  |                          |  |
| AT1G27730                                  | Cys2/His2-type zinc-finger protein               |             |  |                          |  |
| AT4G35770                                  | Senescence 1 (SEN1)                              |             |  |                          |  |
| AT4G02380                                  | Late embryogenesis abundant like protein (SAG21) |             |  |                          |  |
| AT4G25380                                  | Stress-associated protein 10(SAP10)              |             |  |                          |  |
| AT1G05680                                  | UDP-glucosyltransferase (UGT74E2)                |             |  |                          |  |
| AT5G24110                                  | WRKY transcription factor 30 (WRKY30)            |             |  |                          |  |
| AT4G24240                                  | WRKY Transcription Factor 7(WRKY7)               |             |  |                          |  |
| <b>Response to reactive oxygen species</b> |                                                  |             |  |                          |  |
| <i>igr2</i>                                |                                                  | <i>cat2</i> |  | <i>Overlapping genes</i> |  |

|           |                                                                                     |           |                                                                         |           |                                                     |
|-----------|-------------------------------------------------------------------------------------|-----------|-------------------------------------------------------------------------|-----------|-----------------------------------------------------|
| AT1G72660 | P-loop containing nucleoside triphosphate hydrolases superfamily protein            | AT3G13610 | 2-oxoglutarate (2OG) and Fe(II)-dependent oxygenase superfamily protein | AT4G12400 | Carboxylate clamp-tetratricopeptide repeat proteins |
| AT4G18450 | Ethylene response factor subfamily B-3 of ERF/AP2 transcription factor family (ERF) | AT2G29500 | HSP20-like chaperones superfamily protein                               | AT2G47180 | Galactinol synthase 1 (GOLS1)                       |
| AT1G14200 | RING/U-box superfamily protein                                                      | AT2G46600 | Calcium-binding EF-hand family protein                                  | AT4G02380 | Late embryogenesis abundant like protein (SAG21)    |
| AT3G25190 | Vacuolar iron transporter-like protein                                              | AT3G09440 | Heat shock protein 70 (HSP70) family protein                            |           |                                                     |
| AT5G51440 | HSP20-like chaperones superfamily protein                                           | AT3G44190 | FAD/NAD(P)-binding oxidoreductase family protein                        |           |                                                     |
| AT2G20940 | Unknown protein                                                                     | AT5G03630 | ATMDAR2                                                                 |           |                                                     |
| AT1G44414 | Unknown protein                                                                     | AT1G54100 | Aldehyde dehydrogenase 7b4 (ALDHA7b4)                                   |           |                                                     |
| AT1G17860 | Kunitz family trypsin and protease inhibitor protein                                | AT1G07890 | Ascorbate peroxidase 1 (APX1)                                           |           |                                                     |
| AT5G07330 | Unknown protein                                                                     | AT5G67480 | Btb and taz domain protein 4 (BT4)                                      |           |                                                     |
| AT1G54840 | HSP20-like chaperones superfamily protein                                           | AT1G08830 | Copper/zinc superoxide dismutase 1 (CSD1)                               |           |                                                     |
| AT5G37670 | HSP20-like chaperones superfamily protein                                           | AT3G09350 | Fes1a (FES1A)                                                           |           |                                                     |
| AT5G35320 | Unknown protein                                                                     | AT2G47180 | Galactinol synthase 1 (GOLS1)                                           |           |                                                     |
| AT2G30480 | Unknown protein                                                                     | AT1G16030 | Heat shock protein 70b (HSP70B)                                         |           |                                                     |
| AT1G30070 | SGS domain-containing protein                                                       | AT5G52640 | Heat shock protein 90.1 (HSP90.1)                                       |           |                                                     |
| AT4G23493 | Unknown protein                                                                     | AT2G26150 | Heat shock transcription factor a2                                      |           |                                                     |

|           |                                                            |           |                                                                      |  |  |
|-----------|------------------------------------------------------------|-----------|----------------------------------------------------------------------|--|--|
|           |                                                            |           | (HSFA2)                                                              |  |  |
| AT4G23810 | WRKY Transcription Factor(WRKY53)                          | AT4G12400 | Carboxylate clamp-tetratricopeptide repeat proteins                  |  |  |
| AT2G19590 | Acc oxidase 1 (ACOL)                                       | AT1G72520 | Lipoxygenase 4 (LOX4)                                                |  |  |
| AT2G47000 | ABC transporter B family member 4 (ABCB4)                  | AT5G27600 | Long-chain acyl-coa synthetase 7 (LACS7)                             |  |  |
| AT2G46240 | Bcl-2-associated athanogene 6 (BAG6)                       | AT4G25200 | Mitochondrion-localized small heat shock protein 23.6 (HSP23.6-mito) |  |  |
| AT5G63160 | Btb and taz domain protein 1 (BT1)                         | AT3G24500 | Multiprotein bridging factor 1c (MBF1c)                              |  |  |
| AT3G48360 | Btb and taz domain protein 2 (BT2)                         | AT2G06050 | Oxophytodienoate-reductase 3 (OPR3)                                  |  |  |
| AT5G64930 | Regulator of pathogenesis-related (PR) genes (HYS1)        | AT4G02380 | Late embryogenesis abundant like protein (SAG21)                     |  |  |
| AT5G05410 | Dehydration-responsive element-binding protein 2A (DREB2A) |           |                                                                      |  |  |
| AT3G63060 | F-box protein (EDL3)                                       |           |                                                                      |  |  |
| AT4G17490 | Ethylene responsive element binding factor 6 (ERF6)        |           |                                                                      |  |  |
| AT2G47180 | Galactinol synthase 1 (GOLS1)                              |           |                                                                      |  |  |
| AT3G04120 | Cytosolic GADPH C subunit (GAPC1)                          |           |                                                                      |  |  |
| AT3G51910 | Heat shock transcription factor                            |           |                                                                      |  |  |
| AT1G65040 | Homolog of yeast hrd1 (HRD1B)                              |           |                                                                      |  |  |
| AT4G12400 | Carboxylate clamp-tetratricopeptide                        |           |                                                                      |  |  |

|                                      |                                                                          |             |                                                                         |                          |                                                     |
|--------------------------------------|--------------------------------------------------------------------------|-------------|-------------------------------------------------------------------------|--------------------------|-----------------------------------------------------|
|                                      | repeat proteins                                                          |             |                                                                         |                          |                                                     |
| AT1G73260                            | Kunitz trypsin inhibitor 1 (KTI1)                                        |             |                                                                         |                          |                                                     |
| AT1G16420                            | Cysteine-type endopeptidase 8(MC8)                                       |             |                                                                         |                          |                                                     |
| AT5G39610                            | NAC domain containing protein 2 (NAC2)                                   |             |                                                                         |                          |                                                     |
| AT5G04950                            | Nicotianamine synthase 1 (NAS1)                                          |             |                                                                         |                          |                                                     |
| AT1G04980                            | Disulfide isomerase-like protein (PDI10)                                 |             |                                                                         |                          |                                                     |
| AT3G17790                            | Purple acid phosphatase 17 (PAP17)                                       |             |                                                                         |                          |                                                     |
| AT3G16050                            | Pyridoxine biosynthesis 1.2 (PDX1.2)                                     |             |                                                                         |                          |                                                     |
| AT3G25230                            | FK506 binding protein (FKBP62)                                           |             |                                                                         |                          |                                                     |
| AT4G02380                            | Late embryogenesis abundant like protein (SAG21)                         |             |                                                                         |                          |                                                     |
| AT4G25380                            | Stress-associated protein 10 (SAP10)                                     |             |                                                                         |                          |                                                     |
| AT1G05680                            | UDP-glucosyltransferase (UGT74E2)                                        |             |                                                                         |                          |                                                     |
| AT5G24110                            | WRKY dna-binding protein 30 (WRKY30)                                     |             |                                                                         |                          |                                                     |
| AT4G24240                            | WRKY dna-binding protein 7 (WRKY7)                                       |             |                                                                         |                          |                                                     |
| <b>Response to hydrogen peroxide</b> |                                                                          |             |                                                                         |                          |                                                     |
| <i>igr2</i>                          |                                                                          | <i>cat2</i> |                                                                         | <b>Overlapping genes</b> |                                                     |
| AT1G72660                            | P-loop containing nucleoside triphosphate hydrolases superfamily protein | AT3G13610   | 2-oxoglutarate (2OG) and Fe(II)-dependent oxygenase superfamily protein | AT4G12400                | Carboxylate clamp-tetratricopeptide repeat proteins |
| AT4G18450                            | Ethylene response factor subfamily                                       | AT2G29500   | HSP20-like chaperones superfamily                                       | AT2G47180                | Galactinol synthase 1 (GOLS1)                       |



|           |                                                      |           |                                                                      |  |  |
|-----------|------------------------------------------------------|-----------|----------------------------------------------------------------------|--|--|
|           | B-3 of ERF/AP2 transcription factor family (ERF)     |           | protein                                                              |  |  |
| AT1G14200 | RING/U-box superfamily protein                       | AT2G46600 | Calcium-binding EF-hand family protein                               |  |  |
| AT5G51440 | HSP20-like chaperones superfamily protein            | AT3G09440 | Heat shock protein 70 (HSP 70) family protein                        |  |  |
| AT2G20940 | Unknown protein                                      | AT3G44190 | FAD/NAD(P)-binding oxidoreductase family protein                     |  |  |
| AT1G44414 | Unknown protein                                      | AT5G03630 | Atmdar2                                                              |  |  |
| AT1G17860 | Kunitz family trypsin and protease inhibitor protein | AT1G07890 | Ascorbate peroxidase 1 (APX1)                                        |  |  |
| AT5G07330 | Unknown protein                                      | AT5G67480 | Btb and taz domain protein 4 (BT4)                                   |  |  |
| AT1G54840 | HSP20-like chaperones superfamily protein            | AT3G09350 | Fes1a (FESLA)                                                        |  |  |
| AT5G37670 | HSP20-like chaperones superfamily protein            | AT2G47180 | Galactinol synthase 1 (GOLS1)                                        |  |  |
| AT5G35320 | Unknown protein                                      | AT1G16030 | Heat shock protein 70b (HSP70b)                                      |  |  |
| AT2G30480 | Unknown protein                                      | AT5G52640 | Heat shock protein 90.1 (HSP90.1)                                    |  |  |
| AT1G30070 | SGS domain-containing protein                        | AT2G26150 | Heat shock transcription factor a2 (HSFA2)                           |  |  |
| AT4G23493 | Unknown protein                                      | AT4G12400 | Carboxylate clamp-tetratricopeptide repeat proteins                  |  |  |
| AT4G23810 | WRKY transcription Factor(WRKY53)                    | AT4G25200 | Mitochondrion-localized small heat shock protein 23.6 (HSP23.6-mito) |  |  |
| AT2G46240 | Bcl-2-associated athanogene 6                        | AT3G24500 | Multiprotein bridging factor 1c                                      |  |  |

|           | (BAG6)                                                     |  | (MBF1C) |  |  |
|-----------|------------------------------------------------------------|--|---------|--|--|
| AT5G63160 | Btb and taz domain protein 1 (BT1)                         |  |         |  |  |
| AT3G48360 | Btb and taz domain protein 2 (BT2)                         |  |         |  |  |
| AT5G64930 | Regulator of pathogenesis-related (PR) genes (HYS1)        |  |         |  |  |
| AT5G05410 | Dehydration-responsive element-binding protein 2A (DREB2A) |  |         |  |  |
| AT3G63060 | F-box protein (EDL3)                                       |  |         |  |  |
| AT2G47180 | Galactinol synthase 1 (GOLS1)                              |  |         |  |  |
| AT3G04120 | Cytosolic GADPH C subunit (GAPC1)                          |  |         |  |  |
| AT3G51910 | Heat shock transcription factor                            |  |         |  |  |
| AT1G65040 | Homolog of yeast hrd1 (HRD1B)                              |  |         |  |  |
| AT4G12400 | Carboxylate clamp-tetratricopeptide repeat proteins        |  |         |  |  |
| AT1G73260 | Kunitz trypsin inhibitor 1 (KTI1)                          |  |         |  |  |
| AT1G16420 | Cysteine-type endopeptidase 8(MC8)                         |  |         |  |  |
| AT1G04980 | Disulfide isomerase-like protein (PDI10)                   |  |         |  |  |
| AT3G17790 | Purple acid phosphatase 17 (PAP17)                         |  |         |  |  |
| AT3G16050 | Pyridoxine biosynthesis 1.2 (PDX1.2)                       |  |         |  |  |
| AT3G25230 | FK506 binding protein (FKBP62)                             |  |         |  |  |
| AT4G25380 | Stress-associated protein 10 (SAP10)                       |  |         |  |  |
| AT1G05680 | UDP-glucosyltransferase (UGT74E2)                          |  |         |  |  |

|                         |                                                                                         |             |                                      |                          |                                      |
|-------------------------|-----------------------------------------------------------------------------------------|-------------|--------------------------------------|--------------------------|--------------------------------------|
| AT5G24110               | WRKY dna-binding protein 30 (WRKY30)                                                    |             |                                      |                          |                                      |
| AT4G24240               | WRKY dna-binding protein 7 (WRKY7)                                                      |             |                                      |                          |                                      |
| <b>Leaf senescence</b>  |                                                                                         |             |                                      |                          |                                      |
| <i>igr2</i>             |                                                                                         | <i>cat2</i> |                                      | <i>Overlapping genes</i> |                                      |
| AT4G23810               | WRKY transcription factor(WRKY53)                                                       | AT3G11340   | UDP-glycosyltransferase-like protein | AT3G11340                | UDP-glycosyltransferase-like protein |
| AT2G13810               | AGD2-like defense response protein 1 (ALD1)                                             |             |                                      |                          |                                      |
| AT3G62770               | Protein required for autophagosome formation during nutrient deprivation and senescence |             |                                      |                          |                                      |
| AT5G64930               | Regulator of pathogenesis-related (PR) genes (HYS1)                                     |             |                                      |                          |                                      |
| AT2G39200               | MLO-like protein 12 (MLO12)                                                             |             |                                      |                          |                                      |
| AT5G39610               | NAC-domain transcription factor (NAC2)                                                  |             |                                      |                          |                                      |
| AT3G10500               | NAC domain containing protein 53 (NAC053)                                               |             |                                      |                          |                                      |
| AT3G11340               | UDP-glycosyltransferase-like protein                                                    |             |                                      |                          |                                      |
| AT2G35980               | Late embryogenesis abundant hydroxyproline-rich glycoprotein (YLS9)                     |             |                                      |                          |                                      |
| <b>Defense response</b> |                                                                                         |             |                                      |                          |                                      |

| <i>igr2</i> |                                                                         | <i>cat2</i> |                                                                                            | <i>Overlapping genes</i> |                                                  |
|-------------|-------------------------------------------------------------------------|-------------|--------------------------------------------------------------------------------------------|--------------------------|--------------------------------------------------|
| AT2G43620   | Chitinase family protein                                                | AT3G51660   | Tautomerase/MIF superfamily protein                                                        | AT3G11340                | UDP-glycosyltransferase-like protein             |
| AT3G28510   | AAA-type ATPase family protein                                          | AT3G15356   | Legume lectin family protein                                                               | AT2G03760                | Flavonol sulfotransferase-like protein (SOT12)   |
| AT1G78410   | VQ motif-containing protein                                             | AT2G43620   | Chitinase family protein                                                                   | AT4G02380                | Late embryogenesis abundant like protein (SAG21) |
| AT5G39580   | Peroxidase 62                                                           | AT1G77920   | bZIP transcription factor family protein                                                   | AT5G20230                | Blue-copper-binding protein (SAG14)              |
| AT2G27660   | Cysteine/Histidine-rich C1 domain family protein                        | AT3G07720   | Galactose oxidase/kelch repeat superfamily protein                                         | AT2G43620                | Chitinase family protein                         |
| AT1G13470   | Unknown protein                                                         | AT1G66100   | PR (pathogenesis-related) protein                                                          | AT2G24850                | Tyrosine aminotransferase 3 (TAT3)               |
| AT4G10500   | 2-oxoglutarate (2OG) and Fe(II)-dependent oxygenase superfamily protein | AT1G76070   | Unknown protein                                                                            |                          |                                                  |
| AT4G39830   | Putative L-ascorbate oxidase                                            | AT1G76600   | Unknown protein                                                                            |                          |                                                  |
| AT1G51790   | Leucine-rich repeat protein kinase family protein                       | AT3G11480   | SABATH methyltransferase (BSMT1)                                                           |                          |                                                  |
| AT5G64120   | Peroxidase 71                                                           | AT1G09970   | RLK7 belongs to a leucine-rich repeat class of receptor-like kinase (LRR-RLKs) (LRR XI-23) |                          |                                                  |
| AT5G51190   | Ethylene response factor 105 (ERF105)                                   | AT4G16760   | Acyl-coa oxidase 1 (ACX1)                                                                  |                          |                                                  |
| AT3G48640   | Unknown protein                                                         | AT5G42650   | Allene oxide synthase (AOS)                                                                |                          |                                                  |

|           |                                                                                         |           |                                                                  |  |  |
|-----------|-----------------------------------------------------------------------------------------|-----------|------------------------------------------------------------------|--|--|
| AT4G23810 | WRKY transcription factor (WRKY53)                                                      | AT3G28930 | Avrrpt2-induced gene 2 (AIG2)                                    |  |  |
| AT3G57240 | Beta-1,3-glucanase 3 (BG3)                                                              | AT1G52400 | Beta glucosidase 18 (BGLU18)                                     |  |  |
| AT4G11890 | Protein kinase family protein                                                           | AT5G20230 | Blue-copper-binding protein (SAG14)                              |  |  |
| AT2G13810 | AGD2-like defense response protein 1 (ALD1)                                             | AT1G19670 | Chlorophyllase 1 (CLH1)                                          |  |  |
| AT3G62770 | Protein required for autophagosome formation during nutrient deprivation and senescence | AT1G72680 | Cinnamyl-alcohol dehydrogenase (CAD1)                            |  |  |
| AT4G12470 | Azelaic acid induced 1 (AZI1)                                                           | AT1G20440 | Cold-regulated 47 (COR47)                                        |  |  |
| AT2G46240 | Bcl-2-associated athanogene 6 (BAG6)                                                    | AT1G08830 | Copper/zinc superoxide dismutase 1 (CSD1)                        |  |  |
| AT5G20230 | Blue-copper-binding protein (SAG14)                                                     | AT1G70530 | Cysteine-rich rlk (receptor-like protein kinase) 3 (CRK3)        |  |  |
| AT5G64930 | Regulator of pathogenesis-related (PR) genes (HYS1)                                     | AT3G48520 | Cytochrome p450, family 94, subfamily b, polypeptide 3 (cyp94b3) |  |  |
| AT4G23150 | Cysteine-rich rlk (receptor-like protein kinase) 7 (CRK7)                               | AT5G03210 | DBP-interacting protein 2 (DIP2)                                 |  |  |
| AT5G64905 | Elicitor peptide 3 precursor (PROPEP3)                                                  | AT5G09440 | Exordium like 4 (EX14)                                           |  |  |
| AT3G23240 | Ethylene response factor 1 (ERF1)                                                       | AT2G47730 | Glutathione s-transferase phi 8 (GSTF8)                          |  |  |
| AT4G17490 | Ethylene responsive element binding factor 6 (ERF6)                                     | AT5G02500 | Heat shock cognate protein 70-1 (HSC70-1)                        |  |  |

|           |                                                                         |           |                                                             |  |  |
|-----------|-------------------------------------------------------------------------|-----------|-------------------------------------------------------------|--|--|
| AT2G44840 | Ethylene-responsive element binding factor 13 (ERF13)                   | AT5G52640 | Heat shock protein 90.1 (HSP90.1)                           |  |  |
| AT1G19250 | Flavin-dependent monooxygenase 1 (FMOL)                                 | AT3G28730 | High mobility group (HMG)                                   |  |  |
| AT2G19190 | Senescence-induced receptor-like serine/threonine-protein kinase (FRK1) | AT1G17420 | Lipoxygenase 3 (LOX3)                                       |  |  |
| AT1G03850 | Glutaredoxin 13 (GRXS13)                                                | AT1G72520 | Lipoxygenase 4 (LOX4)                                       |  |  |
| AT1G02930 | Glutathione s-transferase 6 (GSTF6)                                     | AT3G02550 | Lob domain-containing protein 41 (IBD41)                    |  |  |
| AT1G73260 | Kunitz trypsin inhibitor 1 (IKTIL)                                      | AT3G50970 | Low temperature-induced 30 (LTI30)                          |  |  |
| AT2G39200 | MLO-like protein 12 (MLO12)                                             | AT1G52030 | Myrosinase-binding protein 2 (MBP2)                         |  |  |
| AT5G14180 | Triacylglycerol lipase 2 (MPL1)                                         | AT2G23150 | Natural resistance-associated macrophage protein 3 (NRAMP3) |  |  |
| AT3G15500 | NAC domain containing protein 3 (NAC3)                                  | AT1G59870 | Penetration 3 (PEN3)                                        |  |  |
| AT2G14610 | Pathogenesis-related gene 1 (PR1)                                       | AT4G35630 | Phosphoserine aminotransferase (PSAT)                       |  |  |
| AT1G04980 | Disulfide isomerase-like protein (PDI10)                                | AT5G06860 | Polygalacturonase inhibiting protein 1 (PGIP1)              |  |  |
| AT5G46050 | Peptide transporter PTR3-A (PTR3)                                       | AT5G06870 | Polygalacturonase inhibiting protein 2 (PGIP2)              |  |  |
| AT5G44420 | Plant defensin 1.2 (PDF1.2)                                             | AT4G17230 | Scarecrow-like 13 (SCI13)                                   |  |  |
| AT3G23010 | Receptor like protein 36 (RLP36)                                        | AT4G02380 | Late embryogenesis abundant like                            |  |  |

|                                                  |                                                                     |             |                                                |                          |                                |
|--------------------------------------------------|---------------------------------------------------------------------|-------------|------------------------------------------------|--------------------------|--------------------------------|
|                                                  |                                                                     |             | protein (SAG21)                                |                          |                                |
| AT4G34410                                        | Redox responsive transcription factor 1 (RRTF1)                     | AT5G63780   | Shoot apical meristem arrest 1 (SHA1)          |                          |                                |
| AT1G27730                                        | Cys2/His2-type zinc-finger protein                                  | AT2G03760   | Flavonol sulfotransferase-like protein (SOT12) |                          |                                |
| AT4G02380                                        | Late embryogenesis abundant like protein (SAG21)                    | AT5G36910   | Thionin 2.2 (THI2.2)                           |                          |                                |
| AT2G03760                                        | Flavonol sulfotransferase-like protein (SOT12)                      | AT2G43510   | Trypsin inhibitor protein 1 (TI1)              |                          |                                |
| AT2G24850                                        | Tyrosine aminotransferase 3 (TAT3)                                  | AT2G43520   | Trypsin inhibitor protein 2 (TI2)              |                          |                                |
| AT3G11340                                        | UDP-glycosyltransferase-like protein                                | AT1G52410   | Tsk-associating protein 1 (TSA1)               |                          |                                |
| AT5G50200                                        | nitrate transmembrane transporter (WR3)                             | AT2G24850   | Tyrosine aminotransferase 3 (TAT3)             |                          |                                |
| AT5G22570                                        | WRKY dna-binding protein 38 (WRKY38)                                | AT3G11340   | UDP-glycosyltransferase-like protein           |                          |                                |
| AT5G26170                                        | WRKY dna-binding protein 50 (WRKY50)                                | AT2G30140   | UDP-glucosyl transferase 87a2 (UGT87a2)        |                          |                                |
| AT5G01900                                        | WRKY dna-binding protein 62 (WRKY62)                                | AT1G80840   | WRKY dna-binding protein 40 (WRKY40)           |                          |                                |
| AT2G35980                                        | Late embryogenesis abundant hydroxyproline-rich glycoprotein (YLS9) | AT5G49520   | WRKY dna-binding protein 48 (WRKY48)           |                          |                                |
| <b>Salicylic acid mediated signaling pathway</b> |                                                                     |             |                                                |                          |                                |
| <i>igr2</i>                                      |                                                                     | <i>cat2</i> |                                                | <b>Overlapping genes</b> |                                |
| AT3G28510                                        | AAA-type ATPase family protein                                      | AT2G27500   | Glycosyl hydrolase superfamily                 | AT2G03760                | Flavonol sulfotransferase-like |

|           |                                                                         |           |                                                                      |           |                                                                      |
|-----------|-------------------------------------------------------------------------|-----------|----------------------------------------------------------------------|-----------|----------------------------------------------------------------------|
|           |                                                                         |           | protein                                                              |           | protein (SOT12)                                                      |
| AT5G64120 | Peroxidase 71                                                           | AT3G28210 | zinc finger AN1 domain-containing stress-associated protein 12 (PMZ) | AT4G02380 | Late embryogenesis abundant like protein (SAG21)                     |
| AT1G78410 | VQ motif-containing protein                                             | AT4G16760 | Acyl-coa oxidase 1 (ACX1)                                            | AT3G28210 | Zinc finger AN1 domain-containing stress-associated protein 12 (PMZ) |
| AT3G48640 | Unknown protein                                                         | AT5G42650 | Allene oxide synthase (AOS)                                          |           |                                                                      |
| AT1G13470 | Unknown protein                                                         | AT4G34710 | Arginine decarboxylase 2 (ADC2)                                      |           |                                                                      |
| AT3G28210 | Zinc finger AN1 domain-containing stress-associated protein 12 (PMZ)    | AT3G28930 | Avrrpt2-induced gene 2 (AIG2)                                        |           |                                                                      |
| AT4G23810 | WRKY transcription factor(WRKY53)                                       | AT1G19670 | Chlorophyllase 1 (CLH1)                                              |           |                                                                      |
| AT3G57240 | Beta-1,3-glucanase 3 (BG3)                                              | AT1G19640 | Jasmonic acid carboxyl methyltransferase (JMT)                       |           |                                                                      |
| AT4G11890 | Protein kinase family protein                                           | AT3G02550 | Lob domain-containing protein 41 (IBD41)                             |           |                                                                      |
| AT2G13810 | AGD2-like defense response protein 1 (ALD1)                             | AT1G52890 | NAC domain containing protein 19 (NAC019)                            |           |                                                                      |
| AT4G12470 | Azelaic acid induced 1 (ZAI1)                                           | AT1G19300 | Parvus (PARVUS)                                                      |           |                                                                      |
| AT2G44840 | Ethylene-responsive element binding factor 13 (ERF13)                   | AT1G59870 | Penetration 3 (PEN3)                                                 |           |                                                                      |
| AT2G19190 | Senescence-induced receptor-like serine/threonine-protein kinase (FRK1) | AT5G27520 | Peroxisomal adenine nucleotide carrier 2 (PNC2)                      |           |                                                                      |
| AT3G15500 | NAC domain containing protein 3 (NAC3)                                  | AT5G06860 | Polygalacturonase inhibiting protein 1 (PGIP1)                       |           |                                                                      |



|                                                 |                                                                      |             |                                                                      |                          |                                                                |
|-------------------------------------------------|----------------------------------------------------------------------|-------------|----------------------------------------------------------------------|--------------------------|----------------------------------------------------------------|
| AT2G14610                                       | Pathogenesis-related gene 1 (PR1)                                    | AT5G06870   | Polygalacturonase inhibiting protein 2 (PGIP2)                       |                          |                                                                |
| AT3G26830                                       | Cytochrome P450 71B15 (PAD3)                                         | AT4G17230   | Scarecrow-like 13 (SCL13)                                            |                          |                                                                |
| AT4G02380                                       | Late embryogenesis abundant like protein (SAG21)                     | AT4G02380   | late embryogenesis abundant like protein (SAG21)                     |                          |                                                                |
| AT2G03760                                       | Flavonol sulfotransferase-like protein (SOT12)                       | AT5G56760   | Serine acetyltransferase 1;1 (SERAT1;1)                              |                          |                                                                |
| AT5G22570                                       | WRKY dna-binding protein 38 (WRKY38)                                 | AT5G63780   | Shoot apical meristem arrest 1 (SHA1)                                |                          |                                                                |
| AT5G01900                                       | WRKY dna-binding protein 62 (WRKY62)                                 | AT2G03760   | Flavonol sulfotransferase-like protein (SOT12)                       |                          |                                                                |
| AT2G35980                                       | Late embryogenesis abundant hydroxyproline-rich glycoprotein (YLS9)  | AT1G80840   | WRKY dna-binding protein 40 (WRKY40)                                 |                          |                                                                |
| <b>Jasmonic acid mediated signaling pathway</b> |                                                                      |             |                                                                      |                          |                                                                |
| <i>igr2</i>                                     |                                                                      | <i>cat2</i> |                                                                      | <b>Overlapping genes</b> |                                                                |
| AT1G78410                                       | VQ motif-containing protein                                          | AT2G34810   | FAD-binding Berberine family protein                                 | AT2G03760                | Flavonol sulfotransferase-like protein (SOT12)                 |
| AT3G28210                                       | Zinc finger AN1 domain-containing stress-associated protein 12 (PMZ) | AT1G06620   | 2-oxoglutarate-dependent dioxygenase                                 | AT2G24850                | Tyrosine aminotransferase 3 (TAT3)                             |
| AT4G23810                                       | WRKY transcription factor (WRKY53)                                   | AT2G27500   | Glycosyl hydrolase superfamily protein                               | AT4G02380                | Late embryogenesis abundant like protein (SAG21)               |
| AT3G57240                                       | Beta-1,3-glucanase 3 (B3)                                            | AT3G28210   | Zinc finger AN1 domain-containing stress-associated protein 12 (PMZ) | AT3G28210                | Zinc finger AN1 domain-containing stress-associated protein 12 |

|           |                                                                         |           |                                                 |           |                                 |
|-----------|-------------------------------------------------------------------------|-----------|-------------------------------------------------|-----------|---------------------------------|
|           |                                                                         |           |                                                 |           | (PMZ)                           |
| AT5G64930 | Regulator of pathogenesis-related (PR) genes (HYS1)                     | AT5G42650 | Allene oxide synthase (AOS)                     | AT4G34710 | Arginine decarboxylase 2 (ADC2) |
| AT3G23240 | Ethylene response factor 1 (ERF1)                                       | AT4G34710 | Arginine decarboxylase 2 (ADC2)                 |           |                                 |
| AT2G44840 | Ethylene-responsive element binding factor 13 (ERF13)                   | AT3G28930 | Avrrpt2-induced gene 2 (AIG2)                   |           |                                 |
| AT2G19190 | Senescence-induced serine/threonine-protein kinase receptor-like (FRK1) | AT1G19670 | Chlorophyllase 1 (CLH1)                         |           |                                 |
| AT3G15500 | NAC domain containing protein 3 (NAC3)                                  | AT5G13220 | Jasmonate-zim-domain protein 10 (JAZ10)         |           |                                 |
| AT2G14610 | Pathogenesis-related gene 1 (PR1)                                       | AT1G19640 | Jasmonic acid carboxyl methyltransferase (JMT)  |           |                                 |
| AT3G26830 | Cytochrome P450 71B15 (PAD3)                                            | AT1G52890 | NAC domain containing protein 19 (NAC019)       |           |                                 |
| AT4G02380 | Late embryogenesis abundant like protein (SAG21)                        | AT2G06050 | Oxophytodienoate-reductase 3 (OPR3)             |           |                                 |
| AT2G03760 | Flavonol sulfotransferase-like protein (SOT12)                          | AT1G19300 | Parvus (parvus)                                 |           |                                 |
| AT2G24850 | Tyrosine aminotransferase 3 (TAT3)                                      | AT1G59870 | Penetration 3 (PEN3)                            |           |                                 |
| AT5G22570 | WRKY dna-binding protein 38 (WRKY38)                                    | AT5G27520 | Peroxisomal adenine nucleotide carrier 2 (PNC2) |           |                                 |
| AT5G26170 | WRKY dna-binding protein 50 (WRKY50)                                    | AT5G06860 | Polygalacturonase inhibiting protein 1 (PGIP1)  |           |                                 |
| AT2G35980 | Late embryogenesis abundant hydroxyproline-rich glycoprotein            | AT5G06870 | Polygalacturonase inhibiting protein 2 (PGIP2)  |           |                                 |

|                                            |                                |             |                                                                      |                          |                                                                      |
|--------------------------------------------|--------------------------------|-------------|----------------------------------------------------------------------|--------------------------|----------------------------------------------------------------------|
|                                            | (YLS9)                         |             |                                                                      |                          |                                                                      |
|                                            |                                | AT4G17230   | Scarecrow-like 13 (SCL13)                                            |                          |                                                                      |
|                                            |                                | AT4G02380   | Late embryogenesis abundant like protein (SAG21)                     |                          |                                                                      |
|                                            |                                | AT5G56760   | Serine acetyltransferase 1;1 (SERAT1;1)                              |                          |                                                                      |
|                                            |                                | AT5G63780   | Shoot apical meristem arrest 1 (SHA1)                                |                          |                                                                      |
|                                            |                                | AT2G03760   | Flavonol sulfotransferase-like protein (SOT12)                       |                          |                                                                      |
|                                            |                                | AT2G24850   | Tyrosine aminotransferase 3 (TAT3)                                   |                          |                                                                      |
|                                            |                                | AT1G80840   | WRKY dna-binding protein 40 (WRKY40)                                 |                          |                                                                      |
| <b>Response to salicylic acid stimulus</b> |                                |             |                                                                      |                          |                                                                      |
| <i>igr2</i>                                |                                | <i>cat2</i> |                                                                      | <b>Overlapping genes</b> |                                                                      |
| AT3G28510                                  | AAA-type ATPase family protein | AT2G27500   | Glycosyl hydrolase superfamily protein                               | AT2G03760                | Flavonol sulfotransferase-like protein (SOT12)                       |
| AT5G64120                                  | Peroxidase 71                  | AT3G28210   | Zinc finger AN1 domain-containing stress-associated protein 12 (PMZ) | AT4G02380                | Late embryogenesis abundant like protein (SAG21)                     |
| AT1G78410                                  | VQ motif-containing protein    | AT4G16760   | Acyl-coa oxidase 1 (ACX1)                                            | AT3G28210                | Zinc finger AN1 domain-containing stress-associated protein 12 (PMZ) |
| AT3G48640                                  | Unknown protein                | AT5G42650   | Allene oxide synthase (AOS)                                          |                          |                                                                      |

|           |                                                                         |           |                                                 |  |  |
|-----------|-------------------------------------------------------------------------|-----------|-------------------------------------------------|--|--|
| AT1G13470 | Unknown protein                                                         | AT4G34710 | Arginine decarboxylase 2 (ADC2)                 |  |  |
| AT3G28210 | Zinc finger AN1 domain-containing stress-associated protein 12 (PMZ)    | AT3G28930 | Avrrpt2-induced gene 2 (AIG2)                   |  |  |
| AT4G23810 | WRKY transcription factor (WRKY53)                                      | AT5G67480 | Btb and taz domain protein 4 (BT4)              |  |  |
| AT3G57240 | Beta-1,3-glucanase 3 (BG3)                                              | AT1G19670 | Chlorophyllase 1 (CLH1)                         |  |  |
| AT4G11890 | Protein kinase family protein                                           | AT2G29420 | Glutathione s-transferase tau 7 (GSTU7)         |  |  |
| AT2G13810 | AGD2-like defense response protein 1 (ALD1)                             | AT1G19640 | Jasmonic acid carboxyl methyltransferase (JMT)  |  |  |
| AT4G12470 | Azelaic acid induced 1 (AZI1)                                           | AT3G02550 | Lob domain-containing protein 41 (LBD41)        |  |  |
| AT5G63160 | Btb and taz domain protein 1 (BT1)                                      | AT1G52890 | NAC domain containing protein 19 (NAC019)       |  |  |
| AT3G48360 | Btb and taz domain protein 2 (BT2)                                      | AT1G19300 | Parvus (parvus)                                 |  |  |
| AT2G44840 | Ethylene-responsive element binding factor 13 (ERF13)                   | AT1G59870 | Penetration 3 (PEN3)                            |  |  |
| AT2G19190 | Senescence-induced receptor-like serine/threonine-protein kinase (FRK1) | AT5G27520 | Peroxisomal adenine nucleotide carrier 2 (PNC2) |  |  |
| AT1G73260 | Kunitz trypsin inhibitor 1 (KTI1)                                       | AT5G06860 | Polygalacturonase inhibiting protein 1 (PGIP1)  |  |  |
| AT4G37260 | Myb domain protein 73 (MYB73)                                           | AT5G06870 | Polygalacturonase inhibiting protein 2 (PGIP2)  |  |  |
| AT3G50060 | Myb domain protein 77 (MYB77)                                           | AT1G43160 | Related to ap2 6 (RAP2.6)                       |  |  |
| AT3G15500 | NAC domain containing protein 3                                         | AT2G33380 | Responsive to dessication 20                    |  |  |

|                                           |                                                                      |             |                                                  |                          |                                                  |
|-------------------------------------------|----------------------------------------------------------------------|-------------|--------------------------------------------------|--------------------------|--------------------------------------------------|
|                                           | (NAC3)                                                               |             | (RD20)                                           |                          |                                                  |
| AT2G14610                                 | Pathogenesis-related gene 1 (PR1)                                    | AT4G17230   | Sarecrow-like 13 (SCL13)                         |                          |                                                  |
| AT5G46050                                 | Peptide transporter PTR3-A (PTR3)                                    | AT4G02380   | Late embryogenesis abundant like protein (SAG21) |                          |                                                  |
| AT3G26830                                 | Cytochrome P450 71B15 (PAD3)                                         | AT5G56760   | Serine acetyltransferase 1;1 (SERAT1;1)          |                          |                                                  |
| AT4G02380                                 | Late embryogenesis abundant like protein (SAG21)                     | AT5G63780   | Shoot apical meristem arrest 1 (SAH1)            |                          |                                                  |
| AT2G03760                                 | flavonol sulfotransferase-like protein (SOT12)                       | AT2G03760   | Flavonol sulfotransferase-like protein (SOT12)   |                          |                                                  |
| AT5G24110                                 | WRKY dna-binding protein 30 (WRKY30)                                 | AT1G80840   | WRKY dna-binding protein 40 (WRKY40)             |                          |                                                  |
| AT5G22570                                 | WRKY dna-binding protein 38 (WRKY38)                                 |             |                                                  |                          |                                                  |
| AT5G01900                                 | WRKY dna-binding protein 62 (WRKY62)                                 |             |                                                  |                          |                                                  |
| AT2G35980                                 | Late embryogenesis abundant hydroxyproline-rich glycoprotein (YLS9)  |             |                                                  |                          |                                                  |
| <b>Response to jasmonic acid stimulus</b> |                                                                      |             |                                                  |                          |                                                  |
| <i>igr2</i>                               |                                                                      | <i>cat2</i> |                                                  | <b>Overlapping genes</b> |                                                  |
| AT1G78410                                 | VQ motif-containing protein                                          | AT2G34810   | FAD-binding Berberine family protein             | AT4G02380                | Late embryogenesis abundant like protein (SAG21) |
| AT3G28210                                 | Zinc finger AN1 domain-containing stress-associated protein 12 (PMZ) | AT1G06620   | 2-oxoglutarate-dependent dioxygenase             | AT3G28210                | Zinc finger AN1 domain-containing                |

|           |                                                                         |           |                                                                      |           |                                     |
|-----------|-------------------------------------------------------------------------|-----------|----------------------------------------------------------------------|-----------|-------------------------------------|
|           |                                                                         |           |                                                                      |           | stress-associated protein 12 (PMZ)  |
| AT4G23810 | WRKY Transcription Factor (WRKY53)                                      | AT1G66760 | MATE efflux family protein                                           | AT5G20230 | Blue-copper-binding protein (SAG14) |
| AT3G57240 | Beta-1,3-glucanase 3 (BG3)                                              | AT2G46520 | Cellular apoptosis susceptibility protein                            | AT2G24850 | Tyrosine aminotransferase 3 (TAT3)  |
| AT2G47000 | ABC transporter B family member 4 (ABCB4)                               | AT5G54170 | Polyketide cyclase/dehydrase and lipid transport superfamily protein |           |                                     |
| AT5G20230 | Blue-copper-binding protein (SAG14)                                     | AT2G27500 | Glycosyl hydrolase superfamily protein                               |           |                                     |
| AT3G48360 | Btb and taz domain protein 2 (BT2)                                      | AT3G11480 | SABATH methyltransferase(BSMT1)                                      |           |                                     |
| AT5G64930 | Regulator of pathogenesis-related (PR) genes (HYS1)                     | AT3G28210 | Zinc finger AN1 domain-containing stress-associated protein 12 (PMZ) |           |                                     |
| AT3G23240 | Ethylene response factor 1 (ERF1)                                       | AT4G16760 | Acyl-coa oxidase 1 (ACX1)                                            |           |                                     |
| AT2G44840 | Ethylene-responsive element binding factor 13 (ERF13)                   | AT5G42650 | Allene oxide synthase (AOS)                                          |           |                                     |
| AT2G19190 | Senescence-induced receptor-like serine/threonine-protein kinase (FRK1) | AT4G34710 | Arginine decarboxylase 2 (ADC2)                                      |           |                                     |
| AT4G37260 | Myb domain protein 73 (MYB73)                                           | AT3G28930 | Avrrpt2-induced gene 2 (AIG2)                                        |           |                                     |
| AT5G39610 | NAC-domain transcription factor (NAC2)                                  | AT5G20230 | Blue-copper-binding protein (SAG14)                                  |           |                                     |
| AT3G15500 | NAC domain containing protein 3 (NAC3)                                  | AT5G67480 | Btb and taz domain protein 4 (BT4)                                   |           |                                     |
| AT2G14610 | Pathogenesis-related gene 1 (PR1)                                       | AT1G19670 | Chlorophyllase 1 (CLH1)                                              |           |                                     |

|           |                                                              |           |                                                                  |  |  |
|-----------|--------------------------------------------------------------|-----------|------------------------------------------------------------------|--|--|
| AT5G46050 | Peptide transporter PTR3-A (PTR3)                            | AT4G23600 | Coronatine induced 1 (CORI3)                                     |  |  |
| AT3G26830 | Cytochrome P450 71B15 (PAD3)                                 | AT3G48520 | Cytochrome p450, family 94, subfamily b, polypeptide 3 (CYP94b3) |  |  |
| AT5G44420 | Plant defensin 1.2 (PDF1.2)                                  | AT2G29450 | Glutathione s-transferase tau 5 (GSTU5)                          |  |  |
| AT4G27410 | NAC domain-containing protein 72 (RD26)                      | AT3G16470 | Jasmonate responsive 1 (JR1)                                     |  |  |
| AT1G27730 | Cys2/His2-type zinc-finger protein                           | AT5G13220 | Jasmonate-zim-domain protein 10 (JAZ10)                          |  |  |
| AT4G35770 | Senescence 1 (SEN1)                                          | AT1G19640 | Jasmonic acid carboxyl methyltransferase (JMT)                   |  |  |
| AT4G02380 | Late embryogenesis abundant like protein (SAG21)             | AT3G45140 | Lipoxygenase 2 (LOX2)                                            |  |  |
| AT2G30360 | CBL-interacting serine/threonine-protein kinase 11 (SIP4)    | AT1G17420 | Lipoxygenase 3 (LOX3)                                            |  |  |
| AT2G03760 | Flavonol sulfotransferase-like protein (SOT12)               | AT1G72520 | Lipoxygenase 4 (LOX4)                                            |  |  |
| AT2G24850 | Tyrosine aminotransferase 3 (TAT3)                           | AT5G10300 | Methyl esterase 5 (MES5)                                         |  |  |
| AT5G22570 | WRKY dna-binding protein 38 (WRKY38)                         | AT4G31780 | Monogalactosyl diacylglycerol synthase 1 (MGD1)                  |  |  |
| AT5G26170 | WRKY dna-binding protein 50 (WRKY50)                         | AT2G39030 | N-Acetyltransferase activity 1 (NATA1)                           |  |  |
| AT2G35980 | Late embryogenesis abundant hydroxyproline-rich glycoprotein | AT1G52890 | NAC domain containing protein 19 (NAC019)                        |  |  |

|                                      |        |           |                                                  |  |  |
|--------------------------------------|--------|-----------|--------------------------------------------------|--|--|
|                                      | (YLS9) |           |                                                  |  |  |
|                                      |        | AT2G06050 | Oxophytodienoate-reductase 3 (OPR3)              |  |  |
|                                      |        | AT1G19300 | Parvus (parvus)                                  |  |  |
|                                      |        | AT1G59870 | Penetration 3 (PEN3)                             |  |  |
|                                      |        | AT5G27520 | Peroxisomal adenine nucleotide carrier 2 (PNC2)  |  |  |
|                                      |        | AT5G06860 | Polygalacturonase inhibiting protein 1 (PGIP1)   |  |  |
|                                      |        | AT5G06870 | Polygalacturonase inhibiting protein 2 (PGIP2)   |  |  |
|                                      |        | AT1G43160 | Related to ap2 6 (RAP2.6)                        |  |  |
|                                      |        | AT4G17230 | Scarecrow-like 13 (SCL13)                        |  |  |
|                                      |        | AT4G02380 | Late embryogenesis abundant like protein (SAG21) |  |  |
|                                      |        | AT5G56760 | Serine acetyltransferase 1;1 (SERAT1;1)          |  |  |
|                                      |        | AT5G63780 | Shoot apical meristem arrest 1 (SHA1)            |  |  |
|                                      |        | AT2G03760 | Flavonol sulfotransferase-like protein (SOT12)   |  |  |
|                                      |        | AT2G24850 | Tyrosine aminotransferase 3 (TAT3)               |  |  |
|                                      |        | AT1G80840 | WRKY dna-binding protein 40 (WRKY40)             |  |  |
| <b>Response to ethylene stimulus</b> |        |           |                                                  |  |  |



| <i>igr2</i> |                                                                                     | <i>cat2</i> |                                                                      | <i>Overlapping genes</i> |                                                                      |
|-------------|-------------------------------------------------------------------------------------|-------------|----------------------------------------------------------------------|--------------------------|----------------------------------------------------------------------|
| AT3G28580   | AAA-type ATPase family protein                                                      | AT4G01870   | TolB protein-related                                                 | AT2G24850                | Tyrosine aminotransferase 3 (TAT3)                                   |
| AT4G18450   | Ethylene response factor subfamily B-3 of ERF/AP2 transcription factor family (ERF) | AT5G27760   | Hypoxia-responsive family protein                                    | AT3G28210                | Zinc finger AN1 domain-containing stress-associated protein 12 (PMZ) |
| AT1G78410   | VQ motif-containing protein                                                         | AT1G76600   | Unknown protein                                                      |                          |                                                                      |
| AT3G25190   | Vacuolar iron transporter-like protein                                              | AT5G03630   | ATMDAR2                                                              |                          |                                                                      |
| AT3G28210   | Zinc finger AN1 domain-containing stress-associated protein 12 (PMZ)                | AT3G28210   | Zinc finger AN1 domain-containing stress-associated protein 12 (PMZ) |                          |                                                                      |
| AT2G47000   | ABC transporter B family member 4 (ABCB4)                                           | AT1G54100   | Aldehyde dehydrogenase 7b4 (ALDH7B4)                                 |                          |                                                                      |
| AT3G55950   | Putative serine/threonine-protein kinase-like protein CCR3 (CCR3)                   | AT4G34710   | Arginine decarboxylase 2 (ADC2)                                      |                          |                                                                      |
| AT1G28360   | ERF domain protein 12 (ERF12)                                                       | AT3G28930   | Avrrpt2-induced gene 2 (AIG2)                                        |                          |                                                                      |
| AT3G23240   | Ethylene response factor 1 (ERF1)                                                   | AT5G13220   | Jasmonate-zim-domain protein 10 (JAZ10)                              |                          |                                                                      |
| AT4G17490   | Ethylene responsive element binding factor 6 (ERF6)                                 | AT1G19640   | Jasmonic acid carboxyl methyltransferase (JMT)                       |                          |                                                                      |
| AT2G44840   | Ethylene-responsive element binding factor 13 (ERF13)                               | AT1G72520   | Lipoxygenase 4 (LOX4)                                                |                          |                                                                      |
| AT4G37260   | Myb domain protein 73 (MYB73)                                                       | AT3G24500   | Multiprotein bridging factor 1c (MBF1C)                              |                          |                                                                      |
| AT3G50060   | Myb domain protein 77 (MYB77)                                                       | AT1G52890   | NAC domain containing protein 19                                     |                          |                                                                      |

|           |                                                           |           |                                                 |  |  |
|-----------|-----------------------------------------------------------|-----------|-------------------------------------------------|--|--|
|           |                                                           |           | (NAC019)                                        |  |  |
| AT5G39610 | NAC-domain transcription factor (NAC2)                    | AT2G06050 | Oxophytodienoate-reductase 3 (OPR3)             |  |  |
| AT3G15500 | NAC domain containing protein 3 (NAC3)                    | AT5G27520 | Peroxisomal adenine nucleotide carrier 2 (PNC2) |  |  |
| AT5G04950 | Nicotianamine synthase 1 (NAS1)                           | AT1G78080 | Related to ap2 4 (RAP2.4)                       |  |  |
| AT3G48850 | Phosphate transporter 3;2 (PHT3;2)                        | AT4G17230 | Scarecrow-like 13 (SCL13)                       |  |  |
| AT3G26830 | Cytochrome P450 71B15 (PAD3)                              | AT2G24850 | Tyrosine aminotransferase 3 (TAT3)              |  |  |
| AT5G44420 | Plant defensin 1.2 (PDF1.2)                               | AT2G15490 | UDP-glycosyltransferase 73b4 (UGT73B4)          |  |  |
| AT5G54190 | Protochlorophyllide oxidoreductase a (PORA)               | AT1G80840 | WRKY dna-binding protein 40 (WRKY40)            |  |  |
| AT4G27440 | Protochlorophyllide oxidoreductase b (PORB)               |           |                                                 |  |  |
| AT4G27410 | NAC domain-containing protein 72 (RD26)                   |           |                                                 |  |  |
| AT1G27730 | Cys2/His2-type zinc-finger protein                        |           |                                                 |  |  |
| AT2G30360 | CBL-interacting serine/threonine-protein kinase 11 (SIP4) |           |                                                 |  |  |
| AT2G24850 | Tyrosine aminotransferase 3 (TAT3)                        |           |                                                 |  |  |

**Table S8.** Comparative analysis of the up-regulated genes enriched in specific GO terms between the transcriptomes of leaves of *igr2-9* and *cat2* plants grown under long-day (LD) conditions. The specific GO terms were those cited in Fig. S5B. The obtained data sets of *cat2* transcriptome were referred to the report by Mhamdi et al. (2010).

| <b>Defense response</b> |                                                                         |             |                                                             |                          |                                      |
|-------------------------|-------------------------------------------------------------------------|-------------|-------------------------------------------------------------|--------------------------|--------------------------------------|
| <i>igr2</i>             |                                                                         | <i>cat2</i> |                                                             | <i>Overlapping genes</i> |                                      |
| AT2G43620               | Chitinase family protein                                                | AT3G15356   | Legume lectin family protein                                | AT1G73260                | Kunitz trypsin inhibitor 1 (KTIL1)   |
| AT3G28510               | AAA-type ATPase family protein                                          | AT5G10760   | Eukaryotic aspartyl protease family protein                 | AT3G11340                | UDP-glycosyltransferase-like protein |
| AT1G78410               | VQ motif-containing protein                                             | AT1G72680   | Cinnamyl-alcohol dehydrogenase(CAD1)                        |                          |                                      |
| AT5G39580               | Peroxidase 62                                                           | AT4G02520   | Glutathione S-transferase PHI 2 (GSTF2)                     |                          |                                      |
| AT2G27660               | Cysteine/Histidine-rich C1 domain family protein                        | AT2G05520   | Glycine-rich protein 3 (GRP-3)                              |                          |                                      |
| AT1G13470               | Unknown protein                                                         | AT5G52640   | Heat shock protein 90.1(HSP90.1)                            |                          |                                      |
| AT4G10500               | 2-oxoglutarate (2OG) and Fe(II)-dependent oxygenase superfamily protein | AT3G28730   | High mobility group (HMG)                                   |                          |                                      |
| AT4G39830               | Putative L-ascorbate oxidase                                            | AT1G73260   | Kunitz trypsin inhibitor 1 (KTIL1)                          |                          |                                      |
| AT1G51790               | Leucine-rich repeat protein kinase family protein                       | AT1G75830   | Low-molecular-weight cysteine-rich 67 (LCR67)               |                          |                                      |
| AT5G64120               | Peroxidase 71                                                           | AT2G23150   | Natural resistance-associated macrophage protein 3 (NRAMP3) |                          |                                      |

|           |                                                                                         |           |                                      |  |  |
|-----------|-----------------------------------------------------------------------------------------|-----------|--------------------------------------|--|--|
| AT5G51190 | Ethylene response factor 105 (ERF105)                                                   | AT3G04720 | Pathogenesis-related 4 (PR4)         |  |  |
| AT3G48640 | Unknown protein                                                                         | AT1G75040 | Pathogenesis-related gene 5 (PR5)    |  |  |
| AT4G23810 | WRKY transcription factor (WRKY53)                                                      | AT2G37710 | Receptor lectin kinase (RLK)         |  |  |
| AT3G57240 | Beta-1,3-glucanase 3 (BG3)                                                              | AT2G43510 | Trypsin inhibitor protein 1(TI1)     |  |  |
| AT4G11890 | Protein kinase family protein                                                           | AT3G11340 | UDP-glycosyltransferase-like protein |  |  |
| AT2G13810 | AGD2-like defense response protein 1 (ALD1)                                             | AT2G25000 | WRKY DNA-binding protein 60 (WRKY60) |  |  |
| AT3G62770 | Protein required for autophagosome formation during nutrient deprivation and senescence |           |                                      |  |  |
| AT4G12470 | Azelaic acid induced 1 (AZI1)                                                           |           |                                      |  |  |
| AT2G46240 | Bcl-2-associated athanogene 6 (BAG6)                                                    |           |                                      |  |  |
| AT5G20230 | Blue-copper-binding protein (SAG14)                                                     |           |                                      |  |  |
| AT5G64930 | Regulator of pathogenesis-related (PR) genes (HYS1)                                     |           |                                      |  |  |
| AT4G23150 | Cysteine-rich rlk (receptor-like protein kinase) 7 (CRK7)                               |           |                                      |  |  |
| AT5G64905 | Elicitor peptide 3 precursor (PROPEP3)                                                  |           |                                      |  |  |
| AT3G23240 | Ethylene response factor 1 (ERF1)                                                       |           |                                      |  |  |

|           |                                                                         |  |  |  |  |
|-----------|-------------------------------------------------------------------------|--|--|--|--|
| AT4G17490 | Ethylene responsive element binding factor 6 (ERF6)                     |  |  |  |  |
| AT2G44840 | Ethylene-responsive element binding factor 13 (ERF13)                   |  |  |  |  |
| AT1G19250 | Flavin-dependent monooxygenase 1 (FMOL)                                 |  |  |  |  |
| AT2G19190 | Senescence-induced receptor-like serine/threonine-protein kinase (FRK1) |  |  |  |  |
| AT1G03850 | Glutaredoxin 13 (GRXS13)                                                |  |  |  |  |
| AT1G02930 | Glutathione s-transferase 6 (GSTF6)                                     |  |  |  |  |
| AT1G73260 | Kunitz trypsin inhibitor 1 (IKTIL)                                      |  |  |  |  |
| AT2G39200 | MLO-like protein 12 (MLO12)                                             |  |  |  |  |
| AT5G14180 | Triacylglycerol lipase 2 (MPL1)                                         |  |  |  |  |
| AT3G15500 | NAC domain containing protein 3 (NAC3)                                  |  |  |  |  |
| AT2G14610 | Pathogenesis-related gene 1 (PR1)                                       |  |  |  |  |
| AT1G04980 | Disulfide isomerase-like protein (PDI10)                                |  |  |  |  |
| AT5G46050 | Peptide transporter PTR3-A (PTR3)                                       |  |  |  |  |
| AT5G44420 | Plant defensin 1.2 (PDF1.2)                                             |  |  |  |  |
| AT3G23010 | Receptor like protein 36 (RLP36)                                        |  |  |  |  |
| AT4G34410 | Redox responsive transcription factor 1 (RRTF1)                         |  |  |  |  |

|                                            |                                                                     |             |                                    |                          |                                   |
|--------------------------------------------|---------------------------------------------------------------------|-------------|------------------------------------|--------------------------|-----------------------------------|
| AT1G27730                                  | Cys2/His2-type zinc-finger protein                                  |             |                                    |                          |                                   |
| AT4G02380                                  | Late embryogenesis abundant like protein (SAG21)                    |             |                                    |                          |                                   |
| AT2G03760                                  | Flavonol sulfotransferase-like protein (SOT12)                      |             |                                    |                          |                                   |
| AT2G24850                                  | Tyrosine aminotransferase 3 (TAT3)                                  |             |                                    |                          |                                   |
| AT3G11340                                  | UDP-glycosyltransferase-like protein                                |             |                                    |                          |                                   |
| AT5G50200                                  | nitrate transmembrane transporter (WR3)                             |             |                                    |                          |                                   |
| AT5G22570                                  | WRKY dna-binding protein 38 (WRKY38)                                |             |                                    |                          |                                   |
| AT5G26170                                  | WRKY dna-binding protein 50 (WRKY50)                                |             |                                    |                          |                                   |
| AT5G01900                                  | WRKY dna-binding protein 62 (WRKY62)                                |             |                                    |                          |                                   |
| AT2G35980                                  | Late embryogenesis abundant hydroxyproline-rich glycoprotein (YLS9) |             |                                    |                          |                                   |
| <b>Response to salicylic acid stimulus</b> |                                                                     |             |                                    |                          |                                   |
| <i>igr2</i>                                |                                                                     | <i>cat2</i> |                                    | <i>Overlapping genes</i> |                                   |
| AT3G28510                                  | AAA-type ATPase family protein                                      | AT3G28210   | Putative zinc finger protein (PMZ) | AT1G73260                | Kunitz trypsin inhibitor 1 (KTI1) |
| AT5G64120                                  | Peroxidase 71                                                       | AT2G05520   | Glycine-rich protein 3 (GRP-3)     |                          |                                   |
| AT1G78410                                  | VQ motif-containing protein                                         | AT1G73260   | Kunitz trypsin inhibitor 1 (KTI1)  |                          |                                   |

|           |                                                                         |           |                                      |  |  |
|-----------|-------------------------------------------------------------------------|-----------|--------------------------------------|--|--|
| AT3G48640 | Unknown protein                                                         | AT1G71030 | MYB-like 2 (MYBL2)                   |  |  |
| AT1G13470 | Unknown protein                                                         | AT1G75040 | Pathogenesis-related gene 5 (PR5)    |  |  |
| AT3G28210 | Zinc finger AN1 domain-containing stress-associated protein 12 (PMZ)    | AT2G37710 | Receptor lectin kinase (RLK)         |  |  |
| AT4G23810 | WRKY transcription factor (WRKY53)                                      | AT1G21270 | Wall-associated kinase 2 (WAK2)      |  |  |
| AT3G57240 | Beta-1,3-glucanase 3 (BG3)                                              | AT2G25000 | WRKY DNA-binding protein 60 (WRKY60) |  |  |
| AT4G11890 | Protein kinase family protein                                           |           |                                      |  |  |
| AT2G13810 | AGD2-like defense response protein 1 (ALD1)                             |           |                                      |  |  |
| AT4G12470 | Azelaic acid induced 1 (AZI1)                                           |           |                                      |  |  |
| AT5G63160 | Btb and taz domain protein 1 (BT1)                                      |           |                                      |  |  |
| AT3G48360 | Btb and taz domain protein 2 (BT2)                                      |           |                                      |  |  |
| AT2G44840 | Ethylene-responsive element binding factor 13 (ERF13)                   |           |                                      |  |  |
| AT2G19190 | Senescence-induced receptor-like serine/threonine-protein kinase (FRK1) |           |                                      |  |  |
| AT1G73260 | Kunitz trypsin inhibitor 1 (KTI1)                                       |           |                                      |  |  |
| AT4G37260 | Myb domain protein 73 (MYB73)                                           |           |                                      |  |  |
| AT3G50060 | Myb domain protein 77 (MYB77)                                           |           |                                      |  |  |

|           |                                                                     |  |  |  |  |
|-----------|---------------------------------------------------------------------|--|--|--|--|
| AT3G15500 | NAC domain containing protein 3 (NAC3)                              |  |  |  |  |
| AT2G14610 | Pathogenesis-related gene 1 (PR1)                                   |  |  |  |  |
| AT5G46050 | Peptide transporter PTR3-A (PTR3)                                   |  |  |  |  |
| AT3G26830 | Cytochrome P450 71B15 (PAD3)                                        |  |  |  |  |
| AT4G02380 | Late embryogenesis abundant like protein (SAG21)                    |  |  |  |  |
| AT2G03760 | flavonol sulfotransferase-like protein (SOT12)                      |  |  |  |  |
| AT5G24110 | WRKY dna-binding protein 30 (WRKY30)                                |  |  |  |  |
| AT5G22570 | WRKY dna-binding protein 38 (WRKY38)                                |  |  |  |  |
| AT5G01900 | WRKY dna-binding protein 62 (WRKY62)                                |  |  |  |  |
| AT2G35980 | Late embryogenesis abundant hydroxyproline-rich glycoprotein (YLS9) |  |  |  |  |



**Table S9.** Comparative analysis of the up-regulated genes enriched in specific GO terms between the transcriptomes of leaves of *igr2-9* and *rml1* plants. The specific GO terms were those cited in Fig. S6. The obtained data sets of *rml1* transcriptome were referred to the report by Schnaubelt et al. (2014).

| <b>Response to oxidative stress</b> |                                                                                     |             |                                                         |                          |                                                  |
|-------------------------------------|-------------------------------------------------------------------------------------|-------------|---------------------------------------------------------|--------------------------|--------------------------------------------------|
| <i>igr2</i>                         |                                                                                     | <i>rml1</i> |                                                         | <i>Overlapping genes</i> |                                                  |
| AT1G72660                           | P-loop containing nucleoside triphosphate hydrolases superfamily protein            | AT4G16190   | Papain family cysteine protease                         | AT1G02930                | Glutathione s-transferase 6 (GSTF6)              |
| AT2G21640                           | Hypothetical protein                                                                | AT1G78410   | VQ motif-containing protein                             | AT1G05680                | UDP-glucosyltransferase (UGT74E2)                |
| AT1G44414                           | Unknown protein                                                                     | AT1G19020   | Unknown protein                                         | AT5G51440                | HSP20-like chaperones superfamily protein        |
| AT1G17860                           | Kunitz family trypsin and protease inhibitor protein                                | AT1G73120   | Unknown protein                                         | AT2G47000                | ABC transporter B family member 4 (ABCB4)        |
| AT5G07330                           | Unknown protein                                                                     | AT5G51440   | HSP20-like chaperones superfamily protein               | AT3G16050                | Pyridoxine biosynthesis 1.2 (PDX1.2)             |
| AT1G54840                           | HSP20-like chaperones superfamily protein                                           | AT2G21640   | Hypothetical protein                                    | AT1G78410                | VQ motif-containing protein                      |
| AT4G18450                           | Ethylene response factor subfamily B-3 of ERF/AP2 transcription factor family (ERF) | AT5G16980   | Zinc-binding dehydrogenase family protein               | AT5G39610                | NAC-domain transcription factor (NAC2)           |
| AT1G72060                           | Serine-type endopeptidase inhibitors                                                | AT1G21520   | Unknown protein                                         | AT2G21640                | Hypothetical protein                             |
| AT1G78410                           | VQ motif-containing protein                                                         | AT1G80130   | Tetratricopeptide repeat (TPR)-like superfamily protein | AT4G02380                | Late embryogenesis abundant like protein (SAG21) |

|           |                                                  |           |                                                                         |           |                                    |
|-----------|--------------------------------------------------|-----------|-------------------------------------------------------------------------|-----------|------------------------------------|
| AT5G51440 | HSP20-like chaperones superfamily protein        | AT5G39730 | AIG2-like (avirulence induced gene) family protein                      | AT1G27730 | Cys2/His2-type zinc-finger protein |
| AT3G25190 | Vacuolar iron transporter-like protein           | AT2G46600 | Calcium-binding EF-hand family protein                                  |           |                                    |
| AT1G14200 | RING/U-box superfamily protein                   | AT1G09970 | Leucine-rich repeat class of receptor-like kinase (LRR-RLKs)(LRR XI-23) |           |                                    |
| AT1G52200 | PLAC8 family protein                             | AT4G12720 | Protein with ADP-ribose hydrolase activity(NUDT7)                       |           |                                    |
| AT2G20940 | Unknown protein(DUF1279)                         | AT4G26080 | ABA insensitive 1 (ABI1)                                                |           |                                    |
| AT5G37670 | HSP20-like chaperones superfamily protein        | AT2G05710 | Aconitase 3 (ACO3)                                                      |           |                                    |
| AT5G35320 | Unknown protein                                  | AT1G54100 | Aldehyde dehydrogenase 7b4 (ALDH7b4)                                    |           |                                    |
| AT2G30480 | Unknown protein                                  | AT5G16970 | Alkenal reductase (AER)                                                 |           |                                    |
| AT4G23493 | Unknown protein                                  | AT2G47000 | ABC transporter B family member 4 (ABCB4)                               |           |                                    |
| AT1G30070 | SGS domain-containing protein                    | AT5G67480 | BTB and TAZ domain protein 4 (BT4)                                      |           |                                    |
| AT3G25250 | Serine/threonine-protein kinase OXI1 (AGC2-1)    | AT1G20620 | Catalase 3 (CAT3)                                                       |           |                                    |
| AT4G23810 | WRKY Transcription Factor (WRKY53)               | AT3G12490 | Cystatin b (CYSB)                                                       |           |                                    |
| AT2G19590 | 1-aminocyclopropane-1-carboxylate oxidase (ACO1) | AT1G19570 | Dehydroascorbate reductase (DHAR1)                                      |           |                                    |

|           |                                                                                         |           |                                                                    |  |  |
|-----------|-----------------------------------------------------------------------------------------|-----------|--------------------------------------------------------------------|--|--|
| AT2G47000 | ABC transporter B family member 4 (ABCB4)                                               | AT2G46270 | G-box binding factor 3 (GBF3)                                      |  |  |
| AT3G62770 | Protein required for autophagosome formation during nutrient deprivation and senescence | AT1G02930 | Glutathione s-transferase 6 (GSTF6)                                |  |  |
| AT2G46240 | Bcl-2-associated athanogene (BAG6)                                                      | AT2G22430 | Homeobox protein 6 (HB6)                                           |  |  |
| AT5G20230 | Blue copper binding protein (SAG14)                                                     | AT3G05970 | Long-chain acyl-coa Synthetase 6 (LACS6)                           |  |  |
| AT5G63160 | BTB and TAZ domain protein (BT1)                                                        | AT5G27600 | Long-chain acyl-coa synthetase 7 (LACS7)                           |  |  |
| AT3G48360 | BTB and TAZ domain protein 2 (BT2)                                                      | AT5G09590 | Mitochondrial hso70 2 (MTHSC70-2)                                  |  |  |
| AT1G76080 | Thioredoxin (CDSP32)                                                                    | AT5G39610 | NAC-domain transcription factor (NAC2)                             |  |  |
| AT5G64930 | Regulator of pathogenesis-related (PR) genes (HYS1)                                     | AT2G19810 | Oxidation-related zinc finger 1 (OZF1)                             |  |  |
| AT5G05410 | Dehydration-responsive element-binding protein 2A (DREB2A)                              | AT3G02800 | Plant and fungi atypical dual-specificity phosphatase 3 (PFA-DSP3) |  |  |
| AT3G63060 | F-box protein (EDL3)                                                                    | AT3G22200 | Pollen-pistil incompatibility 2 (POP2)                             |  |  |
| AT4G17490 | Ethylene responsive element binding factor 6 (ERF6)                                     | AT1G56650 | Production of anthocyanin pigment 1 (PAP1)                         |  |  |
| AT2G47180 | Galactinol synthase 1(GOLS1)                                                            | AT3G16050 | Pyridoxine biosynthesis 1.2 (PDX1.2)                               |  |  |

|           |                                                     |           |                                                  |  |  |
|-----------|-----------------------------------------------------|-----------|--------------------------------------------------|--|--|
| AT1G03850 | Glutaredoxin 13 (GRXS13)                            | AT5G59820 | Responsive to high light 41 (RHL41)              |  |  |
| AT1G02930 | Glutathione S-transferase 6(GSTF6)                  | AT1G49820 | S-methyl-5-thioribose kinase (MTK)               |  |  |
| AT3G04120 | Cytosolic GADPH C subunit (GAPC1)                   | AT1G27730 | Cys2/His2-type zinc-finger protein               |  |  |
| AT3G51910 | Heat stress transcription factor                    | AT4G02380 | Late embryogenesis abundant like protein (SAG21) |  |  |
| AT1G65040 | Homolog of yeast HRD1 (HRD1B)                       | AT5G13930 | Transparent testa 4 (TT4)                        |  |  |
| AT4G12400 | Carboxylate clamp-tetratricopeptide repeat proteins | AT1G05680 | UDP-glucosyltransferase (UGT74E2)                |  |  |
| AT1G73260 | Kunitz trypsin inhibitor 1 (KTI1)                   |           |                                                  |  |  |
| AT3G05790 | Lon protease 4 (LON4)                               |           |                                                  |  |  |
| AT1G16420 | Cysteine-type endopeptidase 8(MC8)                  |           |                                                  |  |  |
| AT5G39610 | NAC-domain transcription factor (NAC2)              |           |                                                  |  |  |
| AT5G04950 | Nicotianamine synthase 1 (NAS1)                     |           |                                                  |  |  |
| AT1G04980 | Disulfide isomerase-like protein (PDI10)            |           |                                                  |  |  |
| AT1G14870 | Plant cadmium resistance 2 (PCR2)                   |           |                                                  |  |  |
| AT3G17790 | Purple acid phosphatase 17 (PAP17)                  |           |                                                  |  |  |
| AT3G16050 | Pyridoxine biosynthesis 1.2 (PDX1.2)                |           |                                                  |  |  |
| AT3G25230 | FK506 binding protein (FKBP62)                      |           |                                                  |  |  |
| AT1G27730 | Cys2/His2-type zinc-finger protein                  |           |                                                  |  |  |

|                                            |                                                                                     |             |                                                    |                          |                                           |
|--------------------------------------------|-------------------------------------------------------------------------------------|-------------|----------------------------------------------------|--------------------------|-------------------------------------------|
| AT4G35770                                  | Senescence 1 (SEN1)                                                                 |             |                                                    |                          |                                           |
| AT4G02380                                  | Late embryogenesis abundant like protein (SAG21)                                    |             |                                                    |                          |                                           |
| AT4G25380                                  | Stress-associated protein 10(SAP10)                                                 |             |                                                    |                          |                                           |
| AT1G05680                                  | UDP-glucosyltransferase (UGT74E2)                                                   |             |                                                    |                          |                                           |
| AT5G24110                                  | WRKY DNA-binding protein 30 (WRKY30)                                                |             |                                                    |                          |                                           |
| AT4G24240                                  | WRKY Transcription Factor 7(WRKY7)                                                  |             |                                                    |                          |                                           |
| <b>Response to reactive oxygen species</b> |                                                                                     |             |                                                    |                          |                                           |
| <i>igr2</i>                                |                                                                                     | <i>rml1</i> |                                                    | <b>Overlapping genes</b> |                                           |
| AT1G72660                                  | P-loop containing nucleoside triphosphate hydrolases superfamily protein            | AT4G16190   | Papain family cysteine protease                    | AT1G05680                | UDP-glucosyltransferase (UGT74E2)         |
| AT4G18450                                  | Ethylene response factor subfamily B-3 of ERF/AP2 transcription factor family (ERF) | AT5G51440   | HSP20-like chaperones superfamily protein          | AT5G51440                | HSP20-like chaperones superfamily protein |
| AT1G14200                                  | RING/U-box superfamily protein                                                      | AT5G39730   | AIG2-like (avirulence induced gene) family protein | AT2G47000                | ABC transporter B family member 4 (ABCB4) |
| AT3G25190                                  | Vacuolar iron transporter-like protein                                              | AT2G46600   | Calcium-binding EF-hand family protein             | AT3G16050                | Pyridoxine biosynthesis 1.2 (PDX1.2)      |
| AT5G51440                                  | HSP20-like chaperones superfamily protein                                           | AT4G12720   | Protein with ADP-ribose hydrolase activity (NUDT7) | AT5G39610                | NAC-domain transcription factor (NAC2)    |

|           |                                                      |           |                                                                    |           |                                                  |
|-----------|------------------------------------------------------|-----------|--------------------------------------------------------------------|-----------|--------------------------------------------------|
| AT2G20940 | Unknown protein                                      | AT4G26080 | ABA INSENSITIVE 1 (ABI1)                                           | AT4G02380 | Late embryogenesis abundant like protein (SAG21) |
| AT1G44414 | Unknown protein                                      | AT2G05710 | Aconitase 3 (ACO3)                                                 |           |                                                  |
| AT1G17860 | Kunitz family trypsin and protease inhibitor protein | AT1G54100 | Aldehyde dehydrogenase 7b4 (ALDH7b4)                               |           |                                                  |
| AT5G07330 | Unknown protein                                      | AT2G47000 | ABC transporter B family member 4 (ABCB4)                          |           |                                                  |
| AT1G54840 | HSP20-like chaperones superfamily protein            | AT5G67480 | BTB and TAZ domain protein 4 (BT4)                                 |           |                                                  |
| AT5G37670 | HSP20-like chaperones superfamily protein            | AT1G20620 | Catalase 3 (CAT3)                                                  |           |                                                  |
| AT5G35320 | Unknown protein                                      | AT1G19570 | Dehydroascorbate reductase (DHAR1)                                 |           |                                                  |
| AT2G30480 | Unknown protein                                      | AT2G46270 | G-box binding factor 3 (GBF3)                                      |           |                                                  |
| AT1G30070 | SGS domain-containing protein                        | AT2G22430 | Homeobox protein 6 (HB6)                                           |           |                                                  |
| AT4G23493 | Unknown protein                                      | AT3G05970 | Long-chain acyl-coa synthetase 6 (LACS6)                           |           |                                                  |
| AT4G23810 | WRKY Transcription Factor(WRKY53)                    | AT5G27600 | Long-chain acyl-coa synthetase 7 (LACS7)                           |           |                                                  |
| AT2G19590 | Acc oxidase 1 (ACOL)                                 | AT5G09590 | Mitochondrial hso70 2 (MTHSC70-2)                                  |           |                                                  |
| AT2G47000 | ABC transporter B family member 4 (ABCB4)            | AT5G39610 | NAC-domain transcription factor (NAC2)                             |           |                                                  |
| AT2G46240 | Bcl-2-associated athanogene 6 (BAG6)                 | AT3G02800 | Plant and fungi atypical dual-specificity phosphatase 3 (PFD-DSP3) |           |                                                  |

|           |                                                            |           |                                                  |  |  |
|-----------|------------------------------------------------------------|-----------|--------------------------------------------------|--|--|
| AT5G63160 | BTB and TAZ domain protein 1 (BT1)                         | AT1G56650 | Production of anthocyanin pigment 1 (PAP1)       |  |  |
| AT3G48360 | BTB and TAZ domain protein 2 (BT2)                         | AT3G16050 | Pyridoxine biosynthesis 1.2 (PDX1.2)             |  |  |
| AT5G64930 | Regulator of pathogenesis-related (PR) genes (HYS1)        | AT1G49820 | S-methyl-5-thioribose kinase (MTK)               |  |  |
| AT5G05410 | Dehydration-responsive element-binding protein 2A (DREB2A) | AT4G02380 | Late embryogenesis abundant like protein (SAG21) |  |  |
| AT3G63060 | F-box protein (EDL3)                                       | AT1G05680 | UDP-glucosyltransferase (UGT74E2)                |  |  |
| AT4G17490 | Ethylene responsive element binding factor 6 (ERF6)        |           |                                                  |  |  |
| AT2G47180 | Galactinol synthase 1 (GOLS1)                              |           |                                                  |  |  |
| AT3G04120 | Cytosolic GADPH C subunit (GAPC1)                          |           |                                                  |  |  |
| AT3G51910 | Heat stress transcription factor                           |           |                                                  |  |  |
| AT1G65040 | Homolog of yeast hrd1 (HRD1B)                              |           |                                                  |  |  |
| AT4G12400 | Carboxylate clamp-tetratricopeptide repeat proteins        |           |                                                  |  |  |
| AT1G73260 | Kunitz trypsin inhibitor 1 (KTI1)                          |           |                                                  |  |  |
| AT1G16420 | Cysteine-type endopeptidase 8(MC8)                         |           |                                                  |  |  |
| AT5G39610 | NAC-domain transcription factor (NAC2)                     |           |                                                  |  |  |
| AT5G04950 | Nicotianamine synthase 1 (NAS1)                            |           |                                                  |  |  |

|                                      |                                                                                     |             |                                      |                          |                                      |
|--------------------------------------|-------------------------------------------------------------------------------------|-------------|--------------------------------------|--------------------------|--------------------------------------|
| AT1G04980                            | Disulfide isomerase-like protein (PDI10)                                            |             |                                      |                          |                                      |
| AT3G17790                            | Purple acid phosphatase 17 (PAP17)                                                  |             |                                      |                          |                                      |
| AT3G16050                            | Pyridoxine biosynthesis 1.2 (PDX1.2)                                                |             |                                      |                          |                                      |
| AT3G25230                            | FK506 binding protein (FKBP62)                                                      |             |                                      |                          |                                      |
| AT4G02380                            | Late embryogenesis abundant like protein (SAG21)                                    |             |                                      |                          |                                      |
| AT4G25380                            | Stress-associated protein 10 (SAP10)                                                |             |                                      |                          |                                      |
| AT1G05680                            | UDP-glucosyltransferase (UGT74E2)                                                   |             |                                      |                          |                                      |
| AT5G24110                            | WRKY DNA-binding protein 30 (WRKY30)                                                |             |                                      |                          |                                      |
| AT4G24240                            | WRKY dna-binding protein 7 (WRKY7)                                                  |             |                                      |                          |                                      |
| <b>Response to hydrogen peroxide</b> |                                                                                     |             |                                      |                          |                                      |
| <i>igr2</i>                          |                                                                                     | <i>rml1</i> |                                      | <i>Overlapping genes</i> |                                      |
| AT1G72660                            | P-loop containing nucleoside triphosphate hydrolases superfamily protein            | AT1G05680   | UDP-glucosyltransferase (UGT74E2)    | AT1G05680                | UDP-glucosyltransferase (UGT74E2)    |
| AT4G18450                            | Ethylene response factor subfamily B-3 of ERF/AP2 transcription factor family (ERF) | AT3G16050   | Pyridoxine biosynthesis 1.2 (PDX1.2) | AT3G16050                | Pyridoxine biosynthesis 1.2 (PDX1.2) |



|           |                                                      |           |                                           |           |                                           |
|-----------|------------------------------------------------------|-----------|-------------------------------------------|-----------|-------------------------------------------|
| AT1G14200 | RING/U-box superfamily protein                       | AT5G51440 | HSP20-like chaperones superfamily protein | AT5G51440 | HSP20-like chaperones superfamily protein |
| AT5G51440 | HSP20-like chaperones superfamily protein            |           |                                           |           |                                           |
| AT2G20940 | Unknown protein                                      |           |                                           |           |                                           |
| AT1G44414 | Unknown protein                                      |           |                                           |           |                                           |
| AT1G17860 | Kunitz family trypsin and protease inhibitor protein |           |                                           |           |                                           |
| AT5G07330 | Unknown protein                                      |           |                                           |           |                                           |
| AT1G54840 | HSP20-like chaperones superfamily protein            |           |                                           |           |                                           |
| AT5G37670 | HSP20-like chaperones superfamily protein            |           |                                           |           |                                           |
| AT5G35320 | Unknown protein                                      |           |                                           |           |                                           |
| AT2G30480 | Unknown protein                                      |           |                                           |           |                                           |
| AT1G30070 | SGS domain-containing protein                        |           |                                           |           |                                           |
| AT4G23493 | Unknown protein                                      |           |                                           |           |                                           |
| AT4G23810 | WRKY transcription Factor(WRKY53)                    |           |                                           |           |                                           |
| AT2G46240 | Bcl-2-associated athanogene 6 (BAG6)                 |           |                                           |           |                                           |
| AT5G63160 | BTB and TAZ domain protein 1 (BT1)                   |           |                                           |           |                                           |
| AT3G48360 | BTB and TAZ domain protein 2 (BT2)                   |           |                                           |           |                                           |

|           |                                                            |  |  |  |  |
|-----------|------------------------------------------------------------|--|--|--|--|
| AT5G64930 | Regulator of pathogenesis-related (PR) genes (HYS1)        |  |  |  |  |
| AT5G05410 | Dehydration-responsive element-binding protein 2A (DREB2A) |  |  |  |  |
| AT3G63060 | F-box protein (EDL3)                                       |  |  |  |  |
| AT2G47180 | Galactinol synthase 1 (GOLS1)                              |  |  |  |  |
| AT3G04120 | Cytosolic GADPH C subunit (GAPC1)                          |  |  |  |  |
| AT3G51910 | Heat stress transcription factor                           |  |  |  |  |
| AT1G65040 | Homolog of yeast hrd1 (HRD1B)                              |  |  |  |  |
| AT4G12400 | Carboxylate clamp-tetratricopeptide repeat proteins        |  |  |  |  |
| AT1G73260 | Kunitz trypsin inhibitor 1 (KTI1)                          |  |  |  |  |
| AT1G16420 | Cysteine-type endopeptidase 8(MC8)                         |  |  |  |  |
| AT1G04980 | Disulfide isomerase-like protein (PDI10)                   |  |  |  |  |
| AT3G17790 | Purple acid phosphatase 17 (PAP17)                         |  |  |  |  |
| AT3G16050 | Pyridoxine biosynthesis 1.2 (PDX1.2)                       |  |  |  |  |
| AT3G25230 | FK506 binding protein (FKBP62)                             |  |  |  |  |
| AT4G25380 | Stress-associated protein 10 (SAP10)                       |  |  |  |  |

|                        |                                                                                         |             |                                           |                          |                                           |
|------------------------|-----------------------------------------------------------------------------------------|-------------|-------------------------------------------|--------------------------|-------------------------------------------|
| AT1G05680              | UDP-glucosyltransferase (UGT74E2)                                                       |             |                                           |                          |                                           |
| AT5G24110              | WRKY DNA-binding protein 30 (WRKY30)                                                    |             |                                           |                          |                                           |
| AT4G24240              | WRKY dna-binding protein 7 (WRKY7)                                                      |             |                                           |                          |                                           |
| <b>Leaf senescence</b> |                                                                                         |             |                                           |                          |                                           |
| <i>igr2</i>            |                                                                                         | <i>rml1</i> |                                           | <i>Overlapping genes</i> |                                           |
| AT4G23810              | WRKY transcription factor(WRKY53)                                                       | AT5G39610   | NAC-domain transcription factor (NAC2)    | AT5G39610                | NAC-domain transcription factor (NAC2)    |
| AT2G13810              | AGD2-like defense response protein 1 (ALD1)                                             | AT3G10500   | NAC domain containing protein 53 (NAC053) | AT3G10500                | NAC domain containing protein 53 (NAC053) |
| AT3G62770              | Protein required for autophagosome formation during nutrient deprivation and senescence |             |                                           |                          |                                           |
| AT5G64930              | Regulator of pathogenesis-related (PR) genes (HYS1)                                     |             |                                           |                          |                                           |
| AT2G39200              | MLO-like protein 12 (MLO12)                                                             |             |                                           |                          |                                           |
| AT5G39610              | NAC-domain transcription factor (NAC2)                                                  |             |                                           |                          |                                           |
| AT3G10500              | NAC domain containing protein 53 (NAC053)                                               |             |                                           |                          |                                           |
| AT3G11340              | UDP-glycosyltransferase-like protein                                                    |             |                                           |                          |                                           |

|                         |                                                                         |             |                                                                                                     |                          |                                                  |
|-------------------------|-------------------------------------------------------------------------|-------------|-----------------------------------------------------------------------------------------------------|--------------------------|--------------------------------------------------|
| AT2G35980               | Late embryogenesis abundant hydroxyproline-rich glycoprotein (YLS9)     |             |                                                                                                     |                          |                                                  |
| <b>Defense response</b> |                                                                         |             |                                                                                                     |                          |                                                  |
| <i>igr2</i>             |                                                                         | <i>rml1</i> |                                                                                                     | <i>Overlapping genes</i> |                                                  |
| AT2G43620               | Chitinase family protein                                                | AT4G12490   | Bifunctional inhibitor/lipid-transfer protein/seed storage 2S albumin superfamily protein           | AT1G02930                | Glutathione s-transferase 6 (GSTF6)              |
| AT3G28510               | AAA-type ATPase family protein                                          | AT4G23670   | Polyketide cyclase/dehydrase and lipid transport superfamily protein                                | AT2G37130                | Peroxidase superfamily protein                   |
| AT1G78410               | VQ motif-containing protein                                             | AT1G77920   | bZIP transcription factor family protein                                                            | AT4G12470                | Azelaic acid induced 1 (AZI1)                    |
| AT5G39580               | Peroxidase 62                                                           | AT2G33710   | A member of the ERF (ethylene response factor) subfamily B-4 of ERF/AP2 transcription factor family | AT1G27730                | Cys2/His2-type zinc-finger protein               |
| AT2G27660               | Cysteine/Histidine-rich C1 domain family protein                        | AT1G55210   | Disease resistance-responsive (dirigent-like protein) family protein                                | AT1G78410                | VQ motif-containing protein                      |
| AT1G13470               | Hypothetical protein                                                    | AT3G60450   | Phosphoglycerate mutase family protein                                                              | AT2G03760                | Flavonol sulfotransferase-like protein (SOT12)   |
| AT4G10500               | 2-oxoglutarate (2OG) and Fe(II)-dependent oxygenase superfamily protein | AT1G72920   | Toll-Interleukin-Resistance (TIR) domain family protein                                             | AT4G02380                | Late embryogenesis abundant like protein (SAG21) |
| AT4G39830               | Putative L-ascorbate oxidase                                            | AT5G42050   | DCD (Development and Cell Death) domain protein                                                     | AT5G46050                | Peptide transporter PTR3-A (PTR3)                |

|           |                                                                                         |           |                                                                          |  |  |
|-----------|-----------------------------------------------------------------------------------------|-----------|--------------------------------------------------------------------------|--|--|
| AT1G51790 | Leucine-rich repeat protein kinase family protein                                       | AT3G16330 | Unknown protein                                                          |  |  |
| AT5G64120 | Peroxidase 71                                                                           | AT2G32030 | Acyl-CoA N-acyltransferases (NAT) superfamily protein                    |  |  |
| AT5G51190 | Ethylene response factor 105 (ERF105)                                                   | AT5G52750 | Heavy metal transport/detoxification superfamily protein                 |  |  |
| AT3G48640 | Hypothetical protein                                                                    | AT1G72940 | Toll-Interleukin-Resistance (TIR) domain-containing protein              |  |  |
| AT4G23810 | WRKY transcription factor (WRKY53)                                                      | AT4G38540 | FAD/NAD(P)-binding oxidoreductase family protein                         |  |  |
| AT3G57240 | Beta-1,3-glucanase 3 (BG3)                                                              | AT1G25275 | Unknown protein                                                          |  |  |
| AT4G11890 | Protein kinase family protein                                                           | AT4G18360 | Aldolase-type TIM barrel family protein                                  |  |  |
| AT2G13810 | AGD2-like defense response protein 1 (ALD1)                                             | AT4G33070 | Thiamine pyrophosphate dependent pyruvate decarboxylase family protein   |  |  |
| AT3G62770 | Protein required for autophagosome formation during nutrient deprivation and senescence | AT1G78410 | VQ motif-containing protein                                              |  |  |
| AT4G12470 | Azelaic acid induced 1 (AZI1)                                                           | AT4G22530 | S-adenosyl-L-methionine-dependent methyltransferases superfamily protein |  |  |
| AT2G46240 | Bcl-2-associated athanogene 6 (BAG6)                                                    | AT1G19020 | Unknown protein                                                          |  |  |
| AT5G20230 | Blue-copper-binding protein (SAG14)                                                     | AT5G18130 | Unknown protein                                                          |  |  |

|           |                                                                         |           |                                                                                           |  |  |
|-----------|-------------------------------------------------------------------------|-----------|-------------------------------------------------------------------------------------------|--|--|
| AT5G64930 | Regulator of pathogenesis-related (PR) genes (HYS1)                     | AT5G17760 | P-loop containing nucleoside triphosphate hydrolases superfamily protein                  |  |  |
| AT4G23150 | Cysteine-rich rlk (receptor-like protein kinase) 7 (CRK7)               | AT3G07720 | Galactose oxidase/kelch repeat superfamily protein                                        |  |  |
| AT5G64905 | Elicitor peptide 3 (PROPEP3)                                            | AT2G37130 | Peroxidase superfamily protein                                                            |  |  |
| AT3G23240 | Ethylene response factor 1 (ERF1)                                       | AT1G72900 | Toll-Interleukin-Resistance (TIR) domain-containing protein                               |  |  |
| AT4G17490 | Ethylene responsive element binding factor 6 (ERF6)                     | AT5G52810 | NAD(P)-binding Rossmann-fold superfamily protein                                          |  |  |
| AT2G44840 | Ethylene-responsive element binding factor 13 (ERF13)                   | AT2G40140 | CZF1                                                                                      |  |  |
| AT1G19250 | Flavin-dependent monooxygenase 1 (FMOL)                                 | AT1G09970 | RLK7 belongs to a leucine-rich repeat class of receptor-like kinase (LRR-RLKs)(LRR XI-23) |  |  |
| AT2G19190 | Senescence-induced receptor-like serine/threonine-protein kinase (FRK1) | AT4G12720 | Protein with ADP-ribose hydrolase activity(NUDT7)                                         |  |  |
| AT1G03850 | Glutaredoxin 13 (GRXS13)                                                | AT1G17745 | 3-phosphoglycerate dehydrogenase (PGDH)                                                   |  |  |
| AT1G02930 | Glutathione s-transferase 6 (GSTF6)                                     | AT4G26080 | ABA insensitive 1 (ABIL)                                                                  |  |  |
| AT1G73260 | Kunitz trypsin inhibitor 1 (1KTIL)                                      | AT4G16760 | Acyl-coa oxidase 1 (ACX1)                                                                 |  |  |
| AT2G39200 | MLO-like protein 12 (MLO12)                                             | AT4G28390 | ADP/ATP carrier 3 (AAC3)                                                                  |  |  |
| AT5G14180 | triacylglycerol lipase 2 (MPL1)                                         | AT5G04720 | Adr1-like 2 (ADR1-l2)                                                                     |  |  |

|           |                                                  |           |                                                                    |  |  |
|-----------|--------------------------------------------------|-----------|--------------------------------------------------------------------|--|--|
| AT3G15500 | NAC domain containing protein 3 (NAC3)           | AT1G77120 | Alcohol dehydrogenase 1 (ADH1)                                     |  |  |
| AT2G14610 | Pathogenesis-related gene 1 (PR1)                | AT4G12470 | Azelaic acid induced 1 (AZI1)                                      |  |  |
| AT1G04980 | Disulfide isomerase-like protein (PDI10)         | AT4G17615 | Calcineurin b-like protein 1 (CBI1)                                |  |  |
| AT5G46050 | Peptide transporter PTR3-A (PTR3)                | AT1G20620 | Catalase 3 (CAT3)                                                  |  |  |
| AT5G44420 | Plant defensin 1.2 (PDF1.2)                      | AT3G44260 | Ccr4- associated factor 1a (CAF1A)                                 |  |  |
| AT3G23010 | Receptor like protein 36 (RLP36)                 | AT1G72680 | Cinnamyl-alcohol dehydrogenase (CAD1)                              |  |  |
| AT4G34410 | Redox responsive transcription factor 1 (RRTF1)  | AT5G12170 | Crt (chloroquine-resistance transporter)-like transporter 3 (CLT3) |  |  |
| AT1G27730 | Cys2/His2-type zinc-finger protein               | AT3G28740 | Cytochrome p450, family 81, subfamily d, polypeptide 11 (CYP81D11) |  |  |
| AT4G02380 | Late embryogenesis abundant like protein (SAG21) | AT1G06080 | Delta 9 desaturase 1 (ADS1)                                        |  |  |
| AT2G03760 | Flavonol sulfotransferase-like protein (SOT12)   | AT5G41070 | Dsrna-binding protein 5 (DRD5)                                     |  |  |
| AT2G24850 | Tyrosine aminotransferase 3 (TAT3)               | AT4G33050 | Embryo sac development arrest 39 (EDA39)                           |  |  |
| AT3G11340 | UDP-glycosyltransferase-like protein             | AT1G28370 | ERF domain protein 11 (ERF11)                                      |  |  |
| AT5G50200 | Nitrate transmembrane transporter (WR3)          | AT5G47220 | Ethylene responsive element binding factor 2 (ERF2)                |  |  |

|           |                                                                     |           |                                                      |  |  |
|-----------|---------------------------------------------------------------------|-----------|------------------------------------------------------|--|--|
| AT5G22570 | Putative WRKY transcription factor 38 (WRKY38)                      | AT5G09440 | Exordium like 4 (EXI4)                               |  |  |
| AT5G26170 | WRKY dna-binding protein 50 (WRKY50)                                | AT5G46330 | Flagellin-sensitive 2 (FLS2)                         |  |  |
| AT5G01900 | WRKY dna-binding protein 62 (WRKY62)                                | AT1G12200 | Flavin monooxygenase (FMO)                           |  |  |
| AT2G35980 | Late embryogenesis abundant hydroxyproline-rich glycoprotein (YLS9) | AT1G02930 | Glutathione s-transferase 6 (GSTF6)                  |  |  |
|           |                                                                     | AT1G03430 | Histidine-containing phosphotransfer factor 5 (AHP5) |  |  |
|           |                                                                     | AT1G19180 | Jasmonate-zim-domain protein 1 (JAZ1)                |  |  |
|           |                                                                     | AT1G55020 | Lipoxygenase 1 (LOX1)                                |  |  |
|           |                                                                     | AT3G05970 | Long-chain acyl-coa synthetase 6 (LACS6)             |  |  |
|           |                                                                     | AT1G18570 | Myb domain protein 51 (MYB51)                        |  |  |
|           |                                                                     | AT2G43000 | NAC domain containing protein 42 (NAC042)            |  |  |
|           |                                                                     | AT5G46180 | Ornithine-delta-aminotransferase (DELTA-OAT)         |  |  |
|           |                                                                     | AT2G28900 | Outer plastid envelope protein 16-1 (OEP16-1)        |  |  |
|           |                                                                     | AT5G46050 | Peptide transporter PTR3-A (PTR3)                    |  |  |
|           |                                                                     | AT4G08770 | Peroxidase 37 (PRX37)                                |  |  |



|                                                  |  |             |                                                  |                          |  |
|--------------------------------------------------|--|-------------|--------------------------------------------------|--------------------------|--|
|                                                  |  | AT4G37870   | Phosphoenolpyruvate carboxykinase 1 (PCK1)       |                          |  |
|                                                  |  | AT4G35630   | Phosphoserine aminotransferase (PSAT)            |                          |  |
|                                                  |  | AT5G06860   | Polygalacturonase inhibiting protein 1 (PGIP1)   |                          |  |
|                                                  |  | AT1G56650   | Production of anthocyanin pigment 1 (PAP1)       |                          |  |
|                                                  |  | AT1G27730   | Cys2/His2-type zinc-finger protein               |                          |  |
|                                                  |  | AT4G02380   | Late embryogenesis abundant like protein (SAG21) |                          |  |
|                                                  |  | AT2G03760   | Flavonol sulfotransferase-like protein (SOT12)   |                          |  |
|                                                  |  | AT2G43510   | Trypsin inhibitor protein 1 (TIL)                |                          |  |
|                                                  |  | AT2G30140   | UDP-glucosyl transferase 87a2 (UGT87a2)          |                          |  |
|                                                  |  | AT4G31800   | WRKY dna-binding protein 18 (WRKY18)             |                          |  |
|                                                  |  | AT1G80840   | WRKY dna-binding protein 40 (WRKY40)             |                          |  |
|                                                  |  | AT2G25000   | WRKY dna-binding protein 60 (WRKY60)             |                          |  |
| <b>Salicylic acid mediated signaling pathway</b> |  |             |                                                  |                          |  |
| <i>igr2</i>                                      |  | <i>rml1</i> |                                                  | <b>Overlapping genes</b> |  |

|           |                                                                         |           |                                                                        |           |                                                  |
|-----------|-------------------------------------------------------------------------|-----------|------------------------------------------------------------------------|-----------|--------------------------------------------------|
| AT3G28510 | AAA-type ATPase family protein                                          | AT4G33070 | Thiamine pyrophosphate dependent pyruvate decarboxylase family protein | AT4G12470 | Azelaic acid induced 1 (AZI1)                    |
| AT5G64120 | Peroxidase 71                                                           | AT1G78410 | VQ motif-containing protein                                            | AT1G78410 | VQ motif-containing protein                      |
| AT1G78410 | VQ motif-containing protein                                             | AT1G19020 | Unknown protein                                                        | AT2G03760 | Flavonol sulfotransferase-like protein (SOT12)   |
| AT3G48640 | Hypothetical protein                                                    | AT1G72900 | Toll-Interleukin-Resistance (TIR) domain-containing protein            | AT4G02380 | Late embryogenesis abundant like protein (SAG21) |
| AT1G13470 | Hypothetical protein                                                    | AT5G42050 | DCD (Development and Cell Death) domain protein                        |           |                                                  |
| AT3G28210 | Zinc finger AN1 domain-containing stress-associated protein 12 (PMZ)    | AT2G40140 | CZF1                                                                   |           |                                                  |
| AT4G23810 | WRKY transcription factor(WRKY53)                                       | AT4G12720 | Protein with ADP-ribose hydrolase activity(NUDT7)                      |           |                                                  |
| AT3G57240 | Beta-1,3-glucanase 3 (BG3)                                              | AT4G26080 | Aba insensitive 1 (ABI1)                                               |           |                                                  |
| AT4G11890 | Protein kinase family protein                                           | AT4G16760 | Acyl-coa oxidase 1 (ACX1)                                              |           |                                                  |
| AT2G13810 | AGD2-like defense response protein 1 (ALD1)                             | AT1G77120 | Alcohol dehydrogenase 1 (ADH1)                                         |           |                                                  |
| AT4G12470 | Azelaic acid induced 1 (ZAI1)                                           | AT4G12470 | Azelaic acid induced 1 (AZI1)                                          |           |                                                  |
| AT2G44840 | Ethylene-responsive element binding factor 13 (ERF13)                   | AT4G17615 | Calcineurin b-like protein 1 (CBL1)                                    |           |                                                  |
| AT2G19190 | Senescence-induced receptor-like serine/threonine-protein kinase (FRK1) | AT4G33050 | Embryo sac development arrest 39 (EDA39)                               |           |                                                  |

|                                                 |                                                                     |             |                                                      |                          |  |
|-------------------------------------------------|---------------------------------------------------------------------|-------------|------------------------------------------------------|--------------------------|--|
| AT3G15500                                       | NAC domain containing protein 3 (NAC3)                              | AT1G28370   | ERF domain protein 11 (ERF11)                        |                          |  |
| AT2G14610                                       | Pathogenesis-related gene 1 (PR1)                                   | AT1G03430   | Histidine-containing phosphotransfer factor 5 (AHP5) |                          |  |
| AT3G26830                                       | Cytochrome P450 71B15 (PAD3)                                        | AT1G19180   | Jasmonate-zim-domain protein 1 (JAZ1)                |                          |  |
| AT4G02380                                       | Late embryogenesis abundant like protein (SAG21)                    | AT1G18570   | Myb domain protein 51 (MYB51)                        |                          |  |
| AT2G03760                                       | Flavonol sulfotransferase-like protein (SOT12)                      | AT5G27520   | Peroxisomal adenine nucleotide carrier 2 (PBC2)      |                          |  |
| AT5G22570                                       | Putative WRKY transcription factor 38 (WRKY38)                      | AT5G06860   | Polygalacturonase inhibiting protein 1 (PGIP1)       |                          |  |
| AT5G01900                                       | WRKY dna-binding protein 62 (WRKY62)                                | AT4G02380   | Late embryogenesis abundant like protein (SAG21)     |                          |  |
| AT2G35980                                       | Late embryogenesis abundant hydroxyproline-rich glycoprotein (YLS9) | AT3G08720   | Serine/threonine protein kinase 2 (S6K2)             |                          |  |
|                                                 |                                                                     | AT2G03760   | Flavonol sulfotransferase-like protein (SOT12)       |                          |  |
|                                                 |                                                                     | AT1G80840   | WRKY dna-binding protein 40 (WRKY40)                 |                          |  |
|                                                 |                                                                     | AT2G25000   | WRKY dna-binding protein 60 (WRKY60)                 |                          |  |
| <b>Jasmonic acid mediated signaling pathway</b> |                                                                     |             |                                                      |                          |  |
| <i>igr2</i>                                     |                                                                     | <i>rml1</i> |                                                      | <i>Overlapping genes</i> |  |

|           |                                                                         |           |                                                      |           |                                                  |
|-----------|-------------------------------------------------------------------------|-----------|------------------------------------------------------|-----------|--------------------------------------------------|
| AT1G78410 | VQ motif-containing protein                                             | AT1G78410 | VQ motif-containing protein                          | AT1G78410 | VQ motif-containing protein                      |
| AT3G28210 | Zinc finger AN1 domain-containing stress-associated protein 12 (PMZ)    | AT5G42050 | DCD (Development and Cell Death) domain protein      | AT2G03760 | Flavonol sulfotransferase-like protein (SOT12)   |
| AT4G23810 | WRKY transcription factor (WRKY53)                                      | AT4G12720 | A protein with ADP-ribose hydrolase activity(NUDT7)  | AT4G02380 | Late embryogenesis abundant like protein (SAG21) |
| AT3G57240 | Beta-1,3-glucanase 3 (B3)                                               | AT4G26080 | ABA insensitive 1 (ABI1)                             |           |                                                  |
| AT5G64930 | Regulator of pathogenesis-related (PR) genes (HYS1)                     | AT4G17615 | Calcineurin b-like protein 1 (CBL1)                  |           |                                                  |
| AT3G23240 | Ethylene response factor 1 (ERF1)                                       | AT4G33050 | Embryo sac development arrest 39 (EDA39)             |           |                                                  |
| AT2G44840 | Ethylene-responsive element binding factor 13 (ERF13)                   | AT1G28370 | ERF domain protein 11 (ERF11)                        |           |                                                  |
| AT2G19190 | Senescence-induced receptor-like serine/threonine-protein kinase (FRK1) | AT5G47220 | Ethylene responsive element binding factor 2 (ERF2)  |           |                                                  |
| AT3G15500 | NAC domain containing protein 3 (NAC3)                                  | AT1G03430 | Histidine-containing phosphotransfer factor 5 (AHP5) |           |                                                  |
| AT2G14610 | Pathogenesis-related gene 1 (PR1)                                       | AT1G19180 | Jasmonate-zim-domain protein 1 (JAZ1)                |           |                                                  |
| AT3G26830 | Cytochrome P450 71B15 (PAD3)                                            | AT1G18570 | Myb domain protein 51 (MYB51)                        |           |                                                  |
| AT4G02380 | Late embryogenesis abundant like protein (SAG21)                        | AT5G27520 | Peroxisomal adenine nucleotide carrier 2 (PNC2)      |           |                                                  |
| AT2G03760 | Flavonol sulfotransferase-like protein (SOT12)                          | AT5G06860 | Polygalacturonase inhibiting protein 1 (PGIP1)       |           |                                                  |

|                                            |                                                                     |             |                                                                        |                          |                                                  |
|--------------------------------------------|---------------------------------------------------------------------|-------------|------------------------------------------------------------------------|--------------------------|--------------------------------------------------|
| AT2G24850                                  | Tyrosine aminotransferase 3 (TAT3)                                  | AT4G02380   | Late embryogenesis abundant like protein (SAG21)                       |                          |                                                  |
| AT5G22570                                  | Putative WRKY transcription factor 38 (WRKY38)                      | AT3G08720   | Serine/threonine protein kinase 2 (S6K2)                               |                          |                                                  |
| AT5G26170                                  | WRKY dna-binding protein 50 (WRKY50)                                | AT5G07010   | Sulfotransferase 2a (ST2A)                                             |                          |                                                  |
| AT2G35980                                  | Late embryogenesis abundant hydroxyproline-rich glycoprotein (YLS9) | AT2G03760   | Flavonol sulfotransferase-like protein (SOT12)                         |                          |                                                  |
|                                            |                                                                     | AT1G80840   | WRKY dna-binding protein 40 (WRKY40)                                   |                          |                                                  |
|                                            |                                                                     | AT2G25000   | WRKY dna-binding protein 60 (WRKY60)                                   |                          |                                                  |
| <b>Response to salicylic acid stimulus</b> |                                                                     |             |                                                                        |                          |                                                  |
| <i>igr2</i>                                |                                                                     | <i>rml1</i> |                                                                        | <b>Overlapping genes</b> |                                                  |
| AT3G28510                                  | AAA-type ATPase family protein                                      | AT4G33070   | Thiamine pyrophosphate dependent pyruvate decarboxylase family protein | AT4G12470                | Azelaic acid induced 1 (AZI1)                    |
| AT5G64120                                  | Peroxidase 71                                                       | AT1G19020   | Unknown protein                                                        | AT1G78410                | VQ motif-containing protein                      |
| AT1G78410                                  | VQ motif-containing protein                                         | AT1G78410   | VQ motif-containing protein                                            | AT2G03760                | Flavonol sulfotransferase-like protein (SOT12)   |
| AT3G48640                                  | Hypothetical protein                                                | AT1G72900   | Toll-Interleukin-Resistance (TIR) domain-containing protein            | AT4G02380                | Late embryogenesis abundant like protein (SAG21) |
| AT1G13470                                  | Hypothetical protein                                                | AT5G42050   | DCD (Development and Cell Death) domain protein                        | AT5G46050                | Peptide transporter PTR3-A (PTR3)                |

|           |                                                                         |           |                                                                               |  |  |
|-----------|-------------------------------------------------------------------------|-----------|-------------------------------------------------------------------------------|--|--|
| AT3G28210 | Zinc finger AN1 domain-containing stress-associated protein 12 (PMZ)    | AT5G08790 | A large family of putative transcriptional activators with NAC domain (ATAF2) |  |  |
| AT4G23810 | WRKY transcription factor (WRKY53)                                      | AT2G40140 | (CZF1)                                                                        |  |  |
| AT3G57240 | Beta-1,3-glucanase 3 (BG3)                                              | AT4G12720 | Protein with ADP-ribose hydrolase activity(NUDT7)                             |  |  |
| AT4G11890 | Protein kinase family protein                                           | AT4G26080 | ABA insensitive 1 (ABI1)                                                      |  |  |
| AT2G13810 | AGD2-like defense response protein 1 (ALD1)                             | AT4G16760 | Acyl-coa oxidase 1 (ACX1)                                                     |  |  |
| AT4G12470 | Azelaic acid induced 1 (AZI1)                                           | AT1G77120 | Alcohol dehydrogenase 1 (ADH1)                                                |  |  |
| AT5G63160 | BTB and TAZ domain protein 1 (BT1)                                      | AT4G12470 | Azelaic acid induced 1 (AZI1)                                                 |  |  |
| AT3G48360 | BTB and TAZ domain protein 2 (BT2)                                      | AT5G67480 | BTB and TAZ domain protein 4 (BT4)                                            |  |  |
| AT2G44840 | Ethylene-responsive element binding factor 13 (ERF13)                   | AT4G17615 | Calcineurin b-like protein 1 (CBL1)                                           |  |  |
| AT2G19190 | Senescence-induced receptor-like serine/threonine-protein kinase (FRK1) | AT4G33050 | Embryo sac development arrest 39 (EDA39)                                      |  |  |
| AT1G73260 | Kunitz trypsin inhibitor 1 (KTI1)                                       | AT1G28370 | ERF domain protein 11 (ERF11)                                                 |  |  |
| AT4G37260 | Myb domain protein 73 (MYB73)                                           | AT2G29420 | Glutathione s-transferase tau 7 (GETU7)                                       |  |  |
| AT3G50060 | Myb domain protein 77 (MYB77)                                           | AT1G03430 | Histidine-containing phosphotransfer factor 5 (AHP5)                          |  |  |

|           |                                                                     |           |                                                  |  |  |
|-----------|---------------------------------------------------------------------|-----------|--------------------------------------------------|--|--|
| AT3G15500 | NAC domain containing protein 3 (NAC3)                              | AT1G19180 | Jasmonate-zim-domain protein 1 (JAZ1)            |  |  |
| AT2G14610 | Pathogenesis-related gene 1 (PR1)                                   | AT3G48920 | Myb domain protein 45 (MYB45)                    |  |  |
| AT5G46050 | Peptide transporter PTR3-A (PTR3)                                   | AT1G18570 | Myb domain protein 51 (MYB51)                    |  |  |
| AT3G26830 | Cytochrome P450 71B15 (PAD3)                                        | AT5G46050 | Peptide transporter PTR3-A (PTR3)                |  |  |
| AT4G02380 | Late embryogenesis abundant like protein (SAG21)                    | AT5G27520 | Peroxisomal adenine nucleotide carrier 2 (PNC2)  |  |  |
| AT2G03760 | Flavonol sulfotransferase-like protein (SOT12)                      | AT5G06860 | Polygalacturonase inhibiting protein 1 (PGIP1)   |  |  |
| AT5G24110 | WRKY DNA-binding protein 30 (WRKY30)                                | AT5G13330 | Related to ap2 6l (RAP2.6l)                      |  |  |
| AT5G22570 | Putative WRKY transcription factor 38 (WRKY38)                      | AT2G33380 | Responsive to dessication 20 (RD20)              |  |  |
| AT5G01900 | WRKY dna-binding protein 62 (WRKY62)                                | AT4G02380 | Late embryogenesis abundant like protein (SAG21) |  |  |
| AT2G35980 | Late embryogenesis abundant hydroxyproline-rich glycoprotein (YLS9) | AT3G08720 | Serine/threonine protein kinase 2 (S6K2)         |  |  |
|           |                                                                     | AT2G03760 | Flavonol sulfotransferase-like protein (SOT12)   |  |  |
|           |                                                                     | AT1G05560 | UDP-glucosyltransferase 75b1 (UGT75b1)           |  |  |
|           |                                                                     | AT4G31800 | WRKY dna-binding protein 18 (WRKY18)             |  |  |

|                                           |                                                                      |             |                                                             |                          |                                                     |
|-------------------------------------------|----------------------------------------------------------------------|-------------|-------------------------------------------------------------|--------------------------|-----------------------------------------------------|
|                                           |                                                                      | AT1G80840   | WRKY dna-binding protein 40 (WRKY40)                        |                          |                                                     |
|                                           |                                                                      | AT2G25000   | WRKY dna-binding protein 60 (WRKY60)                        |                          |                                                     |
| <b>Response to jasmonic acid stimulus</b> |                                                                      |             |                                                             |                          |                                                     |
| <i>igr2</i>                               |                                                                      | <i>rml1</i> |                                                             | <b>Overlapping genes</b> |                                                     |
| AT1G78410                                 | VQ motif-containing protein                                          | AT1G61890   | MATE efflux family protein                                  | AT2G47000                | ABC transporter B family member 4 (ABCB4)           |
| AT3G28210                                 | Zinc finger AN1 domain-containing stress-associated protein 12 (PMZ) | AT1G78410   | VQ motif-containing protein                                 | AT1G78410                | VQ motif-containing protein                         |
| AT4G23810                                 | WRKY Transcription Factor (WRKY53)                                   | AT5G53750   | CBS domain-containing protein                               | AT5G39610                | NAC-domain transcription factor (NAC2)              |
| AT3G57240                                 | Beta-1,3-glucanase 3 (BG3)                                           | AT5G42050   | DCD (Development and Cell Death) domain protein             | AT2G03760                | Flavonol sulfotransferase-like protein (SOT12)      |
| AT2G47000                                 | ABC transporter B family member 4 (ABCB4)                            | AT1G63840   | RING/U-box superfamily protein                              | AT4G02380                | Late embryogenesis abundant like protein (SAG21)    |
| AT5G20230                                 | Blue-copper-binding protein (SAG14)                                  | AT1G01720   | Putative transcriptional activators with NAC domain (ATAF1) | AT1G27730                | Cys2/His2-type zinc-finger protein                  |
| AT3G48360                                 | BTB and TAZ domain protein 2 (BT2)                                   | AT5G08790   | Putative transcriptional activators with NAC domain(ATAF2)  | AT5G46050                | Peptide transporter PTR3-A (PTR3)                   |
| AT5G64930                                 | Regulator of pathogenesis-related (PR) genes (HYS1)                  | AT4G12720   | Protein with ADP-ribose hydrolase activity (NUDT7)          | AT5G47220                | Ethylene responsive element binding factor 2 (ERF2) |
| AT3G23240                                 | Ethylene response factor 1 (ERF1)                                    | AT4G26080   | ABA insensitive 1 (ABI1)                                    |                          |                                                     |



|           |                                                                         |           |                                                     |  |  |
|-----------|-------------------------------------------------------------------------|-----------|-----------------------------------------------------|--|--|
| AT2G44840 | Ethylene-responsive element binding factor 13 (ERF13)                   | AT4G16760 | Acyl-coa oxidase 1 (ACX1)                           |  |  |
| AT2G19190 | Senescence-induced receptor-like serine/threonine-protein kinase (FRK1) | AT2G47000 | ABC transporter B family member 4 (ABCB4)           |  |  |
| AT4G37260 | Myb domain protein 73 (MYB73)                                           | AT1G59640 | Big petal p (BPEP)                                  |  |  |
| AT5G39610 | NAC-domain transcription factor (NAC2)                                  | AT5G67480 | BTB and TAZ domain protein 4 (BT4)                  |  |  |
| AT3G15500 | NAC domain containing protein 3 (NAC3)                                  | AT4G17615 | Calcineurin b-like protein 1 (CBL1)                 |  |  |
| AT2G14610 | Pathogenesis-related gene 1 (PR1)                                       | AT1G76650 | Calmodulin-like 38 (CML38)                          |  |  |
| AT5G46050 | Peptide transporter PTR3-A (PTR3)                                       | AT4G23600 | Coronatine induced 1 (CORI3)                        |  |  |
| AT3G26830 | Cytochrome P450 71B15 (PAD3)                                            | AT1G19570 | Dehydroascorbate reductase (DHAR1)                  |  |  |
| AT5G44420 | Plant defensin 1.2 (PDF1.2)                                             | AT5G09980 | Elicitor peptide 4 precursor (PROPEP4)              |  |  |
| AT4G27410 | NAC domain-containing protein 72 (RD26)                                 | AT4G33050 | Embryo sac development arrest 39 (EDA39)            |  |  |
| AT1G27730 | Cys2/His2-type zinc-finger protein                                      | AT1G28370 | ERF domain protein 11 (ERF11)                       |  |  |
| AT4G35770 | Senescence 1 (SEN1)                                                     | AT5G47220 | Ethylene responsive element binding factor 2 (ERF2) |  |  |
| AT4G02380 | Late embryogenesis abundant like protein (SAG21)                        | AT2G46270 | G-box binding factor 3 (GBF3)                       |  |  |

|           |                                                                     |           |                                                      |  |  |
|-----------|---------------------------------------------------------------------|-----------|------------------------------------------------------|--|--|
| AT2G30360 | CBL-interacting serine/threonine-protein kinase 11 (SIP4)           | AT1G03430 | Histidine-containing phosphotransfer factor 5 (AHP5) |  |  |
| AT2G03760 | Flavonol sulfotransferase-like protein (SOT12)                      | AT1G19180 | Jasmonate-zim-domain protein 1 (JAZ1)                |  |  |
| AT2G24850 | Tyrosine aminotransferase 3 (TAT3)                                  | AT4G22880 | Leucoanthocyanidin dioxygenase (LDOX)                |  |  |
| AT5G22570 | Putative WRKY transcription factor 38 (WRKY38)                      | AT1G55020 | Lipoxygenase 1 (LOX1)                                |  |  |
| AT5G26170 | WRKY dna-binding protein 50 (WRKY50)                                | AT1G18710 | Myb domain protein 47 (MYB47)                        |  |  |
| AT2G35980 | Late embryogenesis abundant hydroxyproline-rich glycoprotein (YLS9) | AT1G18570 | Myb domain protein 51 (MYB51)                        |  |  |
|           |                                                                     | AT5G39610 | NAC-domain transcription factor (NAC2)               |  |  |
|           |                                                                     | AT2G28900 | Outer plastid envelope protein 16-1 (OEP16-1)        |  |  |
|           |                                                                     | AT5G46050 | Peptide transporter PTR3-A (PTR3)                    |  |  |
|           |                                                                     | AT5G27520 | Peroxisomal adenine nucleotide carrier 2 (PNC2)      |  |  |
|           |                                                                     | AT5G54490 | Pinoid-binding protein 1 (PBP1)                      |  |  |
|           |                                                                     | AT5G06860 | Polygalacturonase inhibiting protein 1 (PGIP1)       |  |  |
|           |                                                                     | AT1G56650 | Production of anthocyanin pigment 1 (PAP1)           |  |  |

|                                      |                                                                                     |             |                                                  |                          |                                           |
|--------------------------------------|-------------------------------------------------------------------------------------|-------------|--------------------------------------------------|--------------------------|-------------------------------------------|
|                                      |                                                                                     | AT5G13330   | Related to ap2 6l (RAP2.6l)                      |                          |                                           |
|                                      |                                                                                     | AT5G59820   | Responsive to high light 41 (RHL41)              |                          |                                           |
|                                      |                                                                                     | AT1G27730   | Cys2/His2-type zinc-finger protein               |                          |                                           |
|                                      |                                                                                     | AT4G02380   | Late embryogenesis abundant like protein (SAG21) |                          |                                           |
|                                      |                                                                                     | AT3G08720   | Serine/threonine protein kinase 2 (S6K2)         |                          |                                           |
|                                      |                                                                                     | AT5G07010   | Sulfotransferase 2a (ST2A)                       |                          |                                           |
|                                      |                                                                                     | AT2G03760   | Flavonol sulfotransferase-like protein (SOT12)   |                          |                                           |
|                                      |                                                                                     | AT5G13930   | Transparent testa 4 (TT4)                        |                          |                                           |
|                                      |                                                                                     | AT1G80840   | WRKY dna-binding protein 40 (WRKY40)             |                          |                                           |
|                                      |                                                                                     | AT2G25000   | WRKY dna-binding protein 60 (WRKY60)             |                          |                                           |
| <b>Response to ethylene stimulus</b> |                                                                                     |             |                                                  |                          |                                           |
| <i>igr2</i>                          |                                                                                     | <i>rml1</i> |                                                  | <b>Overlapping genes</b> |                                           |
| AT3G28580                            | AAA-type ATPase family protein                                                      | AT2G36970   | UDP-Glycosyltransferase superfamily protein      | AT2G47000                | ABC transporter B family member 4 (ABCB4) |
| AT4G18450                            | Ethylene response factor subfamily B-3 of ERF/AP2 transcription factor family (ERF) | AT3G28580   | AAA-type ATPase family protein                   | AT1G78410                | VQ motif-containing protein               |
| AT1G78410                            | VQ motif-containing protein                                                         | AT4G01870   | TolB protein-related                             | AT5G39610                | NAC-domain transcription factor (NAC2)    |

|           |                                                                      |           |                                                                                                     |           |                                             |
|-----------|----------------------------------------------------------------------|-----------|-----------------------------------------------------------------------------------------------------|-----------|---------------------------------------------|
| AT3G25190 | Vacuolar iron transporter-like protein                               | AT1G78410 | VQ motif-containing protein                                                                         | AT1G27730 | Cys2/His2-type zinc-finger protein          |
| AT3G28210 | Zinc finger AN1 domain-containing stress-associated protein 12 (PMZ) | AT2G33710 | A member of the ERF (ethylene response factor) subfamily B-4 of ERF/AP2 transcription factor family | AT5G54190 | Protochlorophyllide oxidoreductase a (PORA) |
| AT2G47000 | ABC transporter B family member 4 (ABCB4)                            | AT2G32030 | Acyl-CoA N-acyltransferases (NAT) superfamily protein                                               |           |                                             |
| AT3G55950 | Putative serine/threonine-protein kinase-like protein CCR3 (CCR3)    | AT1G64710 | GroES-like zinc-binding dehydrogenase family protein                                                |           |                                             |
| AT1G28360 | ERF domain protein 12 (ERF12)                                        | AT5G65300 | Unknown protein                                                                                     |           |                                             |
| AT3G23240 | Ethylene response factor 1 (ERF1)                                    | AT5G27760 | Hypoxia-responsive family protein                                                                   |           |                                             |
| AT4G17490 | Ethylene responsive element binding factor 6 (ERF6)                  | AT1G63840 | RING/U-box superfamily protein                                                                      |           |                                             |
| AT2G44840 | Ethylene-responsive element binding factor 13 (ERF13)                | AT4G37370 | Cytochrome p450, family 81, subfamily d, polypeptide 8 (CYP81D8)                                    |           |                                             |
| AT4G37260 | Myb domain protein 73 (MYB73)                                        | AT4G26080 | ABA insensitive 1 (ABI1)                                                                            |           |                                             |
| AT3G50060 | Myb domain protein 77 (MYB77)                                        | AT2G05710 | Aconitase 3 (ACO3)                                                                                  |           |                                             |
| AT5G39610 | NAC-domain transcription factor (NAC2)                               | AT1G54100 | Aldehyde dehydrogenase 7b4 (ALDH7B4)                                                                |           |                                             |
| AT3G15500 | NAC domain containing protein 3 (NAC3)                               | AT2G47000 | ABC transporter B family member 4 (ABCB4)                                                           |           |                                             |
| AT5G04950 | Nicotianamine synthase 1 (NAS1)                                      | AT4G17615 | Calcineurin b-like protein 1 (CBL1)                                                                 |           |                                             |
| AT3G48850 | Phosphate transporter 3;2 (PHT3;2)                                   | AT1G76650 | Calmodulin-like 38 (CML38)                                                                          |           |                                             |
| AT3G26830 | Cytochrome P450 71B15 (PAD3)                                         | AT3G44260 | CCR4- associated factor 1a (CAF1A)                                                                  |           |                                             |
| AT5G44420 | Plant defensin 1.2 (PDF1.2)                                          | AT5G25350 | Ein3-binding f box protein 2 (EBF2)                                                                 |           |                                             |

|           |                                                           |           |                                                                    |  |  |
|-----------|-----------------------------------------------------------|-----------|--------------------------------------------------------------------|--|--|
| AT5G54190 | Protochlorophyllide oxidoreductase a (PORA)               | AT1G28370 | ERF domain protein 11 (ERF11)                                      |  |  |
| AT4G27440 | Protochlorophyllide oxidoreductase b (PORB)               | AT5G25190 | Ethylene and salt inducible 3 (ESE3)                               |  |  |
| AT4G27410 | NAC domain-containing protein 72 (RD26)                   | AT5G47220 | Ethylene responsive element binding factor 2 (ERF2)                |  |  |
| AT1G27730 | Cys2/His2-type zinc-finger protein                        | AT2G46270 | G-box binding factor 3 (GBF3)                                      |  |  |
| AT2G30360 | CBL-interacting serine/threonine-protein kinase 11 (SIP4) | AT4G37580 | Hookless 1 (HLS1)                                                  |  |  |
| AT2G24850 | Tyrosine aminotransferase 3 (TAT3)                        | AT1G19180 | Jasmonate-zim-domain protein 1 (JAZ1)                              |  |  |
|           |                                                           | AT1G73500 | MAP kinase kinase 9 (MKK9)                                         |  |  |
|           |                                                           | AT1G18570 | Myb domain protein 51 (MYB51)                                      |  |  |
|           |                                                           | AT5G39610 | NAC-domain transcription factor (NAC2)                             |  |  |
|           |                                                           | AT2G43000 | NAC domain containing protein 42 (NAC042)                          |  |  |
|           |                                                           | AT5G27520 | Peroxisomal adenine nucleotide carrier 2 (PNC2)                    |  |  |
|           |                                                           | AT5G54490 | Pinoid-binding protein 1 (PBP1)                                    |  |  |
|           |                                                           | AT3G02800 | Plant and fungi atypical dual-specificity phosphatase 3 (PFA-DSP3) |  |  |
|           |                                                           | AT1G56650 | Production of anthocyanin pigment 1 (PAP1)                         |  |  |

|  |  |           |                                             |  |  |
|--|--|-----------|---------------------------------------------|--|--|
|  |  | AT5G54190 | Protochlorophyllide oxidoreductase a (PORA) |  |  |
|  |  | AT5G13330 | Related to ap2 6l (RAP2.6l)                 |  |  |
|  |  | AT1G49820 | s-Methyl-5-thioribose kinase (MTK)          |  |  |
|  |  | AT1G27730 | Cys2/His2-type zinc-finger protein          |  |  |
|  |  | AT3G08720 | Serine/threonine protein kinase 2 (S6K2)    |  |  |
|  |  | AT1G25560 | Tempranillo 1 (TEM1)                        |  |  |
|  |  | AT2G15480 | UDP-glucosyl transferase 73b5 (UGT73B5)     |  |  |
|  |  | AT2G15490 | UDP-glycosyltransferase 73b4 (UGT73B4)      |  |  |
|  |  | AT1G80840 | WRKY dna-binding protein 40 (WRKY40)        |  |  |
